# Supplementary material for: Fe-Catalyzed decarbonylative alkylation–peroxidation of alkenes with aliphatic aldehydes and hydroperoxide under mild conditions
Source: Royal Society of Chemistry journal article supplement (doi:10.1039/c8gc02834f), 2018-11-29

## Fe-catalyzed decarbonylative alkylation-peroxidation of alkenes with aliphatic aldehydes and hydroperoxide under mild conditions

Chuan-Shuo Wu, Rong Li, Qi-Qiang Wang and Luo Yang \*

\*E-mail: [yangluo@xtu.edu.cn](mailto:yangluo@xtu.edu.cn)

### Table of Contents

|                                                                                                                                                              |     |
|--------------------------------------------------------------------------------------------------------------------------------------------------------------|-----|
| I. General information.....                                                                                                                                  | S1  |
| II. General experimental procedures.....                                                                                                                     | S1  |
| III. Radical inhibition experiment.....                                                                                                                      | S2  |
| IV. Spectra data of products <b>3a-3q</b> , <b>4b-4k</b> , <b>5a-5k</b> , <b>6</b> , <b>7a</b> , <b>8a</b> .....                                             | S2  |
| V. References.....                                                                                                                                           | S14 |
| VI. Copies of <sup>1</sup> H and <sup>13</sup> C NMR spectra of products <b>3a-3q</b> , <b>4b-4k</b> , <b>5a-5k</b> , <b>6</b> , <b>7a</b> , <b>8a</b> ..... | S15 |

### I. General information

Unless otherwise noted, all reactions were run in thick-wall pressure-proof glass tube (Chemglass brand microwave tube, CG-4920-01, claimed to withstand pressures up to 300 PSI (20 bars)) to avoiding the possible crack of the reactor, though it never happened in our lab. All commercially available compounds (Energy-Chemical Company in Shanghai, China) were used as purchased without further purification.

Gas chromatograph (GC) was measured on Shimadzu GC-2014 instrument with a FID detector and *n*-dodecane as the internal standard; Gas Chromatograph-Mass Spectrometer (GC-MS) was measured on Agilent 7890-5975C instrument under the EI ionization model, instead. High-resolution mass spectra (HRMS) were obtained from a JEOL JMS-700 instrument (ESI). Thin-layer chromatography (TLC) was performed using E. Merck silica gel 60 F254 precoated plates (0.25 mm); the developed chromatography was analyzed by UV lamp (254 nm). Melting points are uncorrected.

Nuclear magnetic resonance (NMR) spectra were recorded on a Bruker Avance 400 spectrometer at ambient temperature. Chemical shifts for <sup>1</sup>H NMR spectra are reported in parts per million (ppm) from tetramethylsilane with the solvent resonance as the internal standard (chloroform: δ 7.26 ppm, dimethylsulfoxide: δ 2.50 ppm). Chemical shifts for <sup>13</sup>C NMR spectra are reported in parts per million (ppm) from tetramethylsilane with the solvent as the internal standard (chloroform: δ 77.16 ppm, dimethylsulfoxide: δ 39.51 ppm). Data are reported as follows: chemical shift, multiplicity (s = singlet, d = doublet, dd = doublet of doublets, t = triplet, q = quartet, m = multiplet), coupling constant (Hz), and integration.

### II. General experimental procedures

#### (1) Alkylation-peroxidation cascade reaction:

An oven-dried microwave reaction vessel was charged with FeCl<sub>2</sub> (2.5 mol%) in EA (1 mL, pre-prepared solution), styrene (**1a**, 0.2 mmol, 1.0 equiv), *tert*-Butyl hydroperoxide (TBHP, 5.5 M in decane, 0.6 mmol, 3.0 equiv) and isobutyraldehyde (**2a**, 0.5 mmol, 2.5 equiv) under argon atmosphere. The vessel was sealed and stirred at 80 °C (oil bath temperature) for 12 h. Afterwards

the resulting mixture was cooled to room temperature, and concentrated in vacuo and purified by column chromatography on silica gel with a mixture of dichloromethane/petroleum ether as eluent to give the product **3a**.

## (2) One-pot alkylation-peroxidation cascade reaction:

An oven-dried microwave reaction vessel was charged with FeCl<sub>2</sub> (2.5 mol%) in EA (1 mL, pre-prepared solution), styrene (**1a**, 0.2 mmol, 1.0 equiv), *tert*-Butyl hydroperoxide (TBHP, 5.5 M in decane, 0.6 mmol, 3.0 equiv) and isobutyraldehyde (**2a**, 0.5 mmol, 2.5 equiv) under argon atmosphere. The vessel was sealed and heated at 80 °C (oil bath temperature) for 12 h. Afterwards the resulting mixture was cooled to room temperature, and DBU (0.3 mmol, 1.5 equiv) was added and the mixture was heated for another 12 hours at 80 °C. The resulting mixture was cooled to room temperature, concentrated in vacuo and purified by column chromatography on silica gel with a mixture of ethyl acetate/petroleum ether as eluent to give the product **5a**.

## III. Radical inhibition experiment

The cascade reaction of **1a** and **2a** was completely inhibited in the presence of 2,2,6,6-tetramethyl-1-piperidinyloxy (TEMPO), instead, the decarbonylated alkyl radical was captured as 1-isopropoxy-2,2,6,6-tetramethylpiperidine (Scheme 3a). The 1-isopropoxy-2,2,6,6-tetramethylpiperidine was detected by GC-MS.

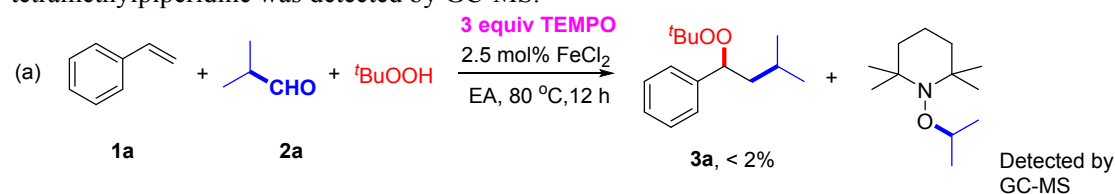

## GC-MS spectrum of the captured alkyl radical: (retention time 7.448 min)

丰度

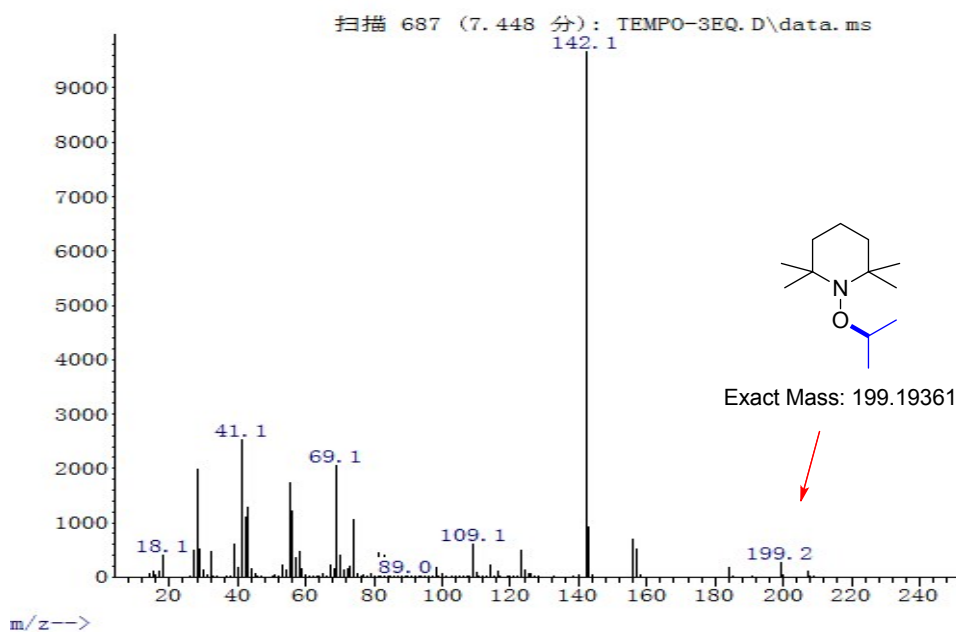

## IV. Spectra data of products 3a-3q, 4b-4k, 5a-5k, 6, 7a, 8a

(3a) (1-(*tert*-butylperoxy)-3-methylbutyl)benzene

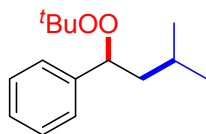

The title compound was prepared according to the general procedure described above by the reaction between styrene (**1a**) with TBHP and isobutyraldehyde (**2a**), and purified by flash column chromatography as colorless oil (32.6 mg, 69%).

$^1\text{H}$  NMR (400 MHz,  $\text{CDCl}_3$ )  $\delta$  7.37 – 7.24 (m, 5H), 4.90 (dd,  $J$  = 7.6, 6.4 Hz, 1H), 1.81 – 1.72 (m, 1H), 1.70 – 1.58 (m, 1H), 1.54 – 1.44 (m, 1H), 1.19 (s, 9H), 0.93 (dd,  $J$  = 6.4, 4.4 Hz, 6H).  $^{13}\text{C}$  NMR (100 MHz,  $\text{CDCl}_3$ )  $\delta$  142.40, 128.23, 127.55, 127.04, 84.35, 80.05, 44.54, 26.66, 25.01, 22.99, 22.97. IR ( $\text{cm}^{-1}$ ): 2957, 2929, 2870, 1454, 1362, 1198, 698. HRMS: calcd. for  $\text{C}_{11}\text{H}_{15}\text{O}^+$  [ $\text{M} - ^t\text{BuO}$ ] $^+$ : 163.1117; Found: 163.1120.

**(3b) 1-(1-(tert-butylperoxy)-3-methylbutyl)-4-methoxybenzene**

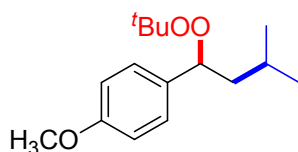

The title compound was prepared according to the general procedure described above by the reaction between 4-methoxystyrene (**1b**) with TBHP and isobutyraldehyde (**2a**), and purified by flash column chromatography as colorless oil (29.3mg, 55%).

$^1\text{H}$  NMR (400 MHz,  $\text{CDCl}_3$ )  $\delta$  7.25 (d,  $J$  = 8.4 Hz, 2H), 6.87 (d,  $J$  = 8.4 Hz, 2H), 4.84 (t,  $J$  = 7.2 Hz, 1H), 3.80 (s, 3H), 1.82 – 1.72 (m, 1H), 1.65 – 1.56 (m, 1H), 1.55 – 1.45 (m, 1H), 1.18 (s, 9H), 0.91 (dd,  $J$  = 6.4, 2.8 Hz, 6H).  $^{13}\text{C}$  NMR (100 MHz,  $\text{CDCl}_3$ )  $\delta$  159.14, 134.19, 128.42, 113.63, 84.02, 80.01, 55.34, 44.05, 26.66, 25.00, 23.14, 22.79. IR ( $\text{cm}^{-1}$ ): 2956, 2930, 2869, 1513, 1247, 1197, 829. HRMS: calcd. for  $\text{C}_{12}\text{H}_{17}\text{O}_2^+$  [ $\text{M} - ^t\text{BuO}$ ] $^+$ : 193.1223; Found: 193.1227.

**(3c) 1-(tert-butyl)-4-(1-(tert-butylperoxy)-3-methylbutyl)benzene**

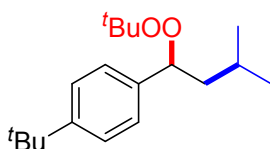

The title compound was prepared according to the general procedure described above by the reaction between 4-*tert*-butylstyrene (**1c**) with TBHP and isobutyraldehyde (**2a**), and purified by flash column chromatography as colorless oil (35.0mg, 60%).

$^1\text{H}$  NMR (400 MHz,  $\text{CDCl}_3$ )  $\delta$  7.36 – 7.32 (m, 2H), 7.26 – 7.22 (m, 2H), 4.87 (t,  $J$  = 6.8 Hz, 1H), 1.83 – 1.73 (m, 1H), 1.72 – 1.60 (m, 1H), 1.55 – 1.44 (m, 1H), 1.31 (s, 9H), 1.20 (s, 9H), 0.92 (t,  $J$  = 6.4 Hz, 6H).  $^{13}\text{C}$  NMR (100 MHz,  $\text{CDCl}_3$ )  $\delta$  150.30, 139.10, 126.68, 125.15, 84.24, 80.10, 44.50, 34.63, 31.54, 26.68, 24.99, 23.02, 22.97. IR ( $\text{cm}^{-1}$ ): 2959, 2931, 2869, 1467, 1362, 1198, 832. HRMS: calcd. for  $\text{C}_{15}\text{H}_{23}\text{O}^+$  [ $\text{M} - ^t\text{BuO}$ ] $^+$ : 219.1743; Found: 219.1747.

**(3d) 1-(1-(tert-butylperoxy)-3-methylbutyl)-4-methylbenzene**

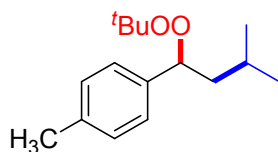

The title compound was prepared according to the general procedure described above by the reaction

between 4-methylstyrene (**1d**) with TBHP and isobutyraldehyde (**2a**), and purified by flash column chromatography as colorless oil (28.5mg, 57%).

$^1\text{H}$  NMR (400 MHz,  $\text{CDCl}_3$ )  $\delta$  7.21 (d,  $J$  = 8.4 Hz, 2H), 7.14 (d,  $J$  = 8.0 Hz, 2H), 4.87 (t,  $J$  = 7.2 Hz, 1H), 2.34 (s, 3H), 1.82 – 1.71 (m, 1H), 1.68 – 1.58 (m, 1H), 1.53 – 1.43 (m, 1H), 1.19 (s, 9H), 0.92 (dd,  $J$  = 6.4, 3.6 Hz, 6H).  $^{13}\text{C}$  NMR (100 MHz,  $\text{CDCl}_3$ )  $\delta$  139.24, 137.19, 128.96, 127.06, 84.26, 80.02, 44.39, 26.67, 25.01, 23.07, 22.89, 21.33. IR ( $\text{cm}^{-1}$ ): 2957, 2928, 2869, 1467, 1362, 1198, 812. HRMS: calcd. for  $\text{C}_{12}\text{H}_{17}\text{O}^+$  [ $\text{M}-t\text{BuO}$ ] $^+$ : 177.1274; Found: 177.1277.

**(3e) 1-(1-(*tert*-butylperoxy)-3-methylbutyl)-4-(chloromethyl)benzene**

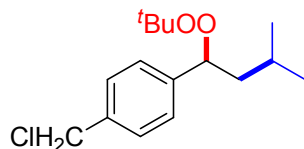

The title compound was prepared according to the general procedure described above by the reaction between 4-chloromethylstyrene (**1e**) with TBHP and isobutyraldehyde (**2a**), and purified by flash column chromatography as colorless oil (33.5mg, 59%).

$^1\text{H}$  NMR (400 MHz,  $\text{CDCl}_3$ )  $\delta$  7.39 – 7.29 (m, 4H), 4.90 (dd,  $J$  = 8.0, 6.4 Hz, 1H), 4.59 (s, 2H), 1.79 – 1.58 (m, 2H), 1.50 – 1.39 (m, 1H), 1.19 (s, 9H), 0.93 (t,  $J$  = 6.4 Hz, 6H).  $^{13}\text{C}$  NMR (100 MHz,  $\text{CDCl}_3$ )  $\delta$  142.96, 136.59, 128.57, 127.32, 83.93, 80.16, 46.34, 44.65, 26.65, 24.99, 23.00, 22.91. IR ( $\text{cm}^{-1}$ ): 2957, 2929, 2869, 1468, 1385, 1197, 680. HRMS: calcd. for  $\text{C}_{12}\text{H}_{16}\text{OCl}^+$  [ $\text{M}-t\text{BuO}$ ] $^+$ : 211.0884; Found: 211.0889.

**(3f) 1-(1-(*tert*-butylperoxy)-3-methylbutyl)-4-(trifluoromethyl)benzene**

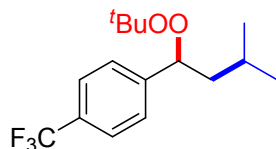

The title compound was prepared according to the general procedure described above by the reaction between 4-trifluoromethylstyrene (**1f**) with TBHP and isobutyraldehyde (**2a**), and purified by flash column chromatography as colorless oil (31.6mg, 52%).

$^1\text{H}$  NMR (400 MHz,  $\text{CDCl}_3$ )  $\delta$  7.59 (d,  $J$  = 8.4 Hz, 2H), 7.44 (d,  $J$  = 8.0 Hz, 2H), 4.96 (dd,  $J$  = 8.0, 5.6 Hz, 1H), 1.87 – 1.63 (m, 2H), 1.47 – 1.35 (m, 1H), 1.20 (s, 9H), 0.94 (dd,  $J$  = 9.6, 6.8 Hz, 6H).  $^{13}\text{C}$  NMR (100 MHz,  $\text{CDCl}_3$ )  $\delta$  146.94, 129.63 (q,  $J$  = 32.2 Hz), 127.06, 125.26 (q,  $J$  = 3.7 Hz), 124.43 (d,  $J$  = 270.3 Hz), 83.59, 80.33, 44.86, 26.61, 24.99, 23.08, 22.75. IR ( $\text{cm}^{-1}$ ): 2960, 2932, 2872, 1469, 1364, 1197, 607. HRMS: calcd. for  $\text{C}_{16}\text{H}_{23}\text{F}_3\text{O}_2\text{Na}^+$  [ $\text{M}+\text{Na}$ ] $^+$ : 327.1542; Found: 327.1541.

**(3g) 1-(1-(*tert*-butylperoxy)-3-methylbutyl)-4-chlorobenzene**

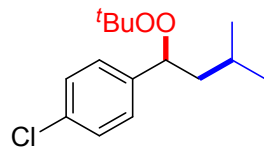

The title compound was prepared according to the general procedure described above by the reaction between 4-chlorostyrene (**1g**) with TBHP and isobutyraldehyde (**2a**), and purified by flash column chromatography as colorless oil (36.2mg, 67%).

$^1\text{H}$  NMR (400 MHz,  $\text{CDCl}_3$ )  $\delta$  7.33 – 7.23 (m, 4H), 4.87 (dd,  $J$  = 7.6, 6.4 Hz, 1H), 1.77 – 1.59 (m, 2H), 1.47 – 1.38 (m, 1H), 1.18 (s, 9H), 0.92 (t,  $J$  = 6.4 Hz, 6H).  $^{13}\text{C}$  NMR (100 MHz,  $\text{CDCl}_3$ )  $\delta$  141.11, 133.15, 128.43, 128.37, 83.58, 80.18, 44.50, 26.63, 24.98, 22.96, 22.90. IR ( $\text{cm}^{-1}$ ): 2958,

2929, 2870, 1490, 1362, 1197, 819. HRMS: calcd. for  $C_{11}H_{14}OCl^+$   $[M-^tBuO]^+$ : 197.0728; Found: 197.0730.

**(3h) 1-(1-(*tert*-butylperoxy)-3-methylbutyl)-3-chlorobenzene**

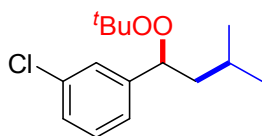

The title compound was prepared according to the general procedure described above by the reaction between 3-chlorostyrene (**1h**) with TBHP and isobutyraldehyde (**2a**), and purified by flash column chromatography as colorless oil (32.9mg, 61%).

$^1H$  NMR (400 MHz,  $CDCl_3$ )  $\delta$  7.31 – 7.19 (m, 4H), 4.86 (dd,  $J$  = 7.6, 6.0 Hz, 1H), 1.78 – 1.61 (m, 2H), 1.48 – 1.37 (m, 1H), 1.19 (s, 9H), 0.93 (dd,  $J$  = 7.2, 6.8 Hz, 6H).  $^{13}C$  NMR (100 MHz,  $CDCl_3$ )  $\delta$  144.90, 134.12, 129.55, 127.63, 127.07, 125.08, 83.62, 80.25, 44.67, 26.64, 24.99, 23.05, 22.82. IR ( $cm^{-1}$ ): 2958, 2930, 2870, 1470, 1362, 1196, 782. HRMS: calcd. for  $C_{11}H_{14}OCl^+$   $[M-^tBuO]^+$ : 197.0728; Found: 197.0731.

**(3i) 1-(1-(*tert*-butylperoxy)-3-methylbutyl)-2-chlorobenzene**

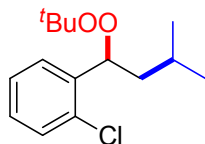

The title compound was prepared according to the general procedure described above by the reaction between 2-chlorostyrene (**1i**) with TBHP and isobutyraldehyde (**2a**), and purified by flash column chromatography as colorless oil (32.9mg, 64%).

$^1H$  NMR (400 MHz,  $CDCl_3$ )  $\delta$  7.53 (dd,  $J$  = 8.0, 2.0 Hz, 1H), 7.18 (td,  $J$  = 8.0, 1.2 Hz, 2H), 7.18 (td,  $J$  = 8.0, 2.0 Hz, 1H), 5.44 (dd,  $J$  = 9.2, 4.4 Hz, 1H), 1.92 – 1.76 (m, 1H), 1.65 – 1.55 (m, 1H), 1.53 – 1.42 (m, 1H), 1.23 (s, 9H), 1.02 (d,  $J$  = 6.8 Hz, 3H), 0.94 (d,  $J$  = 6.4 Hz, 3H).  $^{13}C$  NMR (100 MHz,  $CDCl_3$ )  $\delta$  140.56, 132.39, 129.33, 128.25, 127.83, 126.93, 80.41, 80.32, 44.16, 26.65, 25.25, 23.61, 22.24. IR ( $cm^{-1}$ ): 2958, 2931, 2870, 1469, 1362, 1197, 752. HRMS: calcd. for  $C_{11}H_{14}OCl^+$   $[M-^tBuO]^+$ : 197.0728; Found: 197.0729.

**(3j) 1-bromo-3-(1-(*tert*-butylperoxy)-3-methylbutyl)benzene**

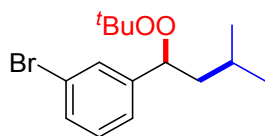

The title compound was prepared according to the general procedure described above by the reaction between 3-bromostyrene (**1j**) with TBHP and isobutyraldehyde (**2a**), and purified by flash column chromatography as colorless oil (43.3mg, 69%).

$^1H$  NMR (400 MHz,  $CDCl_3$ )  $\delta$  7.48 – 7.44 (m, 1H), 7.41 – 7.37 (m, 1H), 7.26 – 7.15 (m, 2H), 4.85 (dd,  $J$  = 8.0, 5.6 Hz, 1H), 1.76 – 1.61 (m, 2H), 1.45 – 1.37 (m, 1H), 1.19 (s, 9H), 0.93 (dd,  $J$  = 8.0, 6.8 Hz, 6H).  $^{13}C$  NMR (100 MHz,  $CDCl_3$ )  $\delta$  145.20, 130.56, 129.99, 129.88, 125.54, 122.39, 83.56, 80.27, 44.70, 26.64, 24.99, 23.06, 22.81. IR ( $cm^{-1}$ ): 2957, 2929, 2869, 1469, 1362, 1195, 780. HRMS: calcd. for  $C_{11}H_{14}OBr^+$   $[M-^tBuO]^+$ : 241.0223; Found: 241.0224.

**(3k) 1-(1-(*tert*-butylperoxy)-3-methylbutyl)-4-fluorobenzene**

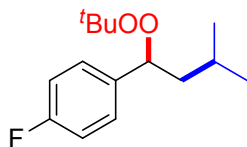

The title compound was prepared according to the general procedure described above by the reaction between 4-fluorostyrene (**1k**) with TBHP and isobutyraldehyde (**2a**), and purified by flash column chromatography as colorless oil (30.5mg, 60%).

$^1\text{H}$  NMR (400 MHz,  $\text{CDCl}_3$ )  $\delta$  7.34 – 7.26 (m, 2H), 7.06 – 6.98 (m, 2H), 4.87 (t,  $J$  = 7.2 Hz, 1H), 1.80 – 1.69 (m, 1H), 1.68 – 1.58 (m, 1H), 1.50 – 1.40 (m, 1H), 1.18 (s, 9H), 0.92 (dd,  $J$  = 6.4, 4.8 Hz, 6H).  $^{13}\text{C}$  NMR (100 MHz,  $\text{CDCl}_3$ )  $\delta$  162.34 (d,  $J$  = 243.3 Hz), 138.17 (d,  $J$  = 3.1 Hz), 128.64 (d,  $J$  = 7.9 Hz), 115.07 (d,  $J$  = 21.1 Hz), 83.63, 80.12, 44.43, 26.64, 24.99, 22.97, 22.91. IR ( $\text{cm}^{-1}$ ): 2958, 2930, 2871, 1510, 1363, 1223, 834. HRMS: calcd. for  $\text{C}_{11}\text{H}_{14}\text{OF}^+$  [ $\text{M}-\text{tBuO}$ ] $^+$ : 181.1023; Found: 181.1023.

**(3l) (1-(tert-butylperoxy)-3-methylbutane-1,2-diyl)dibenzene**

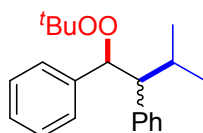

The title compound was prepared according to the general procedure described above by the reaction between (E)-1,2-diphenylethene (**1l**) with TBHP and isobutyraldehyde (**2a**), and purified by flash column chromatography as colorless oil (24.9mg, 40%, dr  $\approx$  1:1).

$^1\text{H}$  NMR (400 MHz,  $\text{CDCl}_3$ )  $\delta$  7.25 – 6.85 (m, 10H), 5.37 (d,  $J$  = 6.0 Hz, 0.5 $\times$ 1H), 5.26 (d,  $J$  = 8.8 Hz, 0.5 $\times$ 1H), 2.96 (dd,  $J$  = 8.8, 6.0 Hz, 0.5 $\times$ 1H), 2.50 (dd,  $J$  = 8.4, 6.4 Hz, 0.5 $\times$ 1H), 2.42 – 2.28 (m, 0.5 $\times$ 1H), 2.18 – 2.04 (m, 0.5 $\times$ 1H), 1.19 (s, 4.5 $\times$ 1H), 1.14 (s, 4.5 $\times$ 1H), 1.06 (d,  $J$  = 6.4 Hz, 1.5 $\times$ 1H), 0.96 (d,  $J$  = 6.8 Hz, 1.5 $\times$ 1H), 0.91 (d,  $J$  = 6.8 Hz, 1.5 $\times$ 1H), 0.72 (d,  $J$  = 6.8 Hz, 1.5 $\times$ 1H).  $^{13}\text{C}$  NMR (100 MHz,  $\text{CDCl}_3$ )  $\delta$  141.72, 140.77, 139.44, 138.68, 130.42, 130.16, 127.94, 127.65, 127.40, 127.37, 127.03, 126.96, 126.17, 126.13, 85.96, 84.95, 79.91, 79.86, 59.94, 57.05, 29.40, 28.32, 26.80, 26.74, 22.14, 21.85, 20.61, 19.12. IR ( $\text{cm}^{-1}$ ): 2976, 2928, 2872, 1452, 1362, 1197, 700. HRMS: calcd. for  $\text{C}_{21}\text{H}_{28}\text{O}_2\text{Na}^+$  [ $\text{M}+\text{Na}$ ] $^+$ : 335.1982; Found: 335.1976.

**(3m) (2-(tert-butylperoxy)-4-methylpentan-2-yl)benzene**

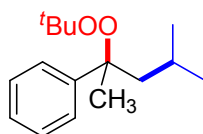

The title compound was prepared according to the general procedure described above by the reaction between  $\alpha$ -methylstyrene (**1m**) with TBHP and isobutyraldehyde (**2a**), and purified by flash column chromatography as colorless oil (30.0mg, 60%).

$^1\text{H}$  NMR (400 MHz,  $\text{CDCl}_3$ )  $\delta$  7.43 – 7.38 (m, 2H), 7.33 – 7.27 (m, 2H), 7.24 – 7.17 (m, 1H), 1.74 – 1.65 (m, 2H), 1.64 (s, 3H), 1.62 – 1.55 (m, 1H), 1.24 (s, 9H), 0.81 (dd,  $J$  = 10.4, 6.4 Hz, 6H).  $^{13}\text{C}$  NMR (100 MHz,  $\text{CDCl}_3$ )  $\delta$  146.23, 127.79, 126.42, 126.01, 84.31, 78.73, 50.75, 26.94, 24.75, 24.60, 24.44, 24.30. IR ( $\text{cm}^{-1}$ ): 2978, 2955, 1446, 1362, 1199, 698. HRMS: calcd. for  $\text{C}_{16}\text{H}_{26}\text{O}_2\text{Na}^+$  [ $\text{M}+\text{Na}$ ] $^+$ : 273.1825; Found: 273.1818.

**(3n) (1-(tert-butylperoxy)-3-methylbutane-1,1-diyl)dibenzene**

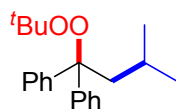

The title compound was prepared according to the general procedure described above by the reaction between 1,1-diphenylethene (**1n**) with TBHP and isobutyraldehyde (**2a**), and purified by flash column chromatography as colorless oil (39.9mg, 64%).

$^1\text{H}$  NMR (400 MHz,  $\text{CDCl}_3$ )  $\delta$  7.37 – 7.17 (m, 10H), 2.33 (d,  $J$  = 5.2 Hz, 2H), 1.66 – 1.56 (m, 1H), 1.08 (s, 9H), 0.77 (d,  $J$  = 6.8 Hz, 6H).  $^{13}\text{C}$  NMR (100 MHz,  $\text{CDCl}_3$ )  $\delta$  145.22, 127.68, 127.46, 126.66, 87.15, 79.05, 45.48, 26.72, 24.49, 23.69. IR ( $\text{cm}^{-1}$ ): 2954, 2928, 2868, 1446, 1362, 1197, 642. HRMS: calcd. for  $\text{C}_{21}\text{H}_{28}\text{O}_2\text{Na}^+$   $[\text{M}+\text{Na}]^+$ : 335.1982; Found: 335.1974.

**(3o) ethyl 2-(tert-butylperoxy)-4-methyl-2-phenylpentanoate**

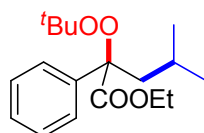

The title compound was prepared according to the general procedure described above by the reaction between ethyl 2-phenylacrylate (**1o**) with TBHP and isobutyraldehyde (**2a**), and purified by flash column chromatography as colorless oil (27.7mg, 45%).

$^1\text{H}$  NMR (400 MHz,  $\text{CDCl}_3$ )  $\delta$  7.40 – 7.23 (m, 5H), 4.23 – 4.07 (m, 2H), 2.34 (dd,  $J$  = 14.8, 6.8 Hz, 1H), 2.09 (dd,  $J$  = 14.8, 5.2 Hz, 1H), 1.58 – 1.44 (m, 1H), 1.30 (s, 9H), 1.20 (t,  $J$  = 7.2 Hz, 3H), 0.91 (d,  $J$  = 6.8 Hz, 3H), 0.64 (d,  $J$  = 6.8 Hz, 3H).  $^{13}\text{C}$  NMR (100 MHz,  $\text{CDCl}_3$ )  $\delta$  172.49, 139.25, 128.01, 127.43, 125.63, 87.61, 80.18, 61.08, 42.94, 26.79, 24.42, 23.76, 23.48, 14.12. IR ( $\text{cm}^{-1}$ ): 2956, 2932, 2870, 1736, 1449, 1364, 1243, 1197, 705. HRMS: calcd. for  $\text{C}_{18}\text{H}_{28}\text{O}_4\text{Na}^+$   $[\text{M}+\text{Na}]^+$ : 331.1880; Found: 331.1882.

**(3p) 2-(1-(tert-butylperoxy)-3-methylbutyl)pyridine**

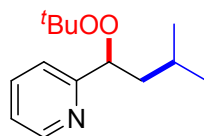

The title compound was prepared according to the general procedure described above but prolong time to 24 hours by the reaction between 2-vinylpyridine (**1p**) with TBHP and isobutyraldehyde (**2a**), and purified by flash column chromatography as colorless oil (17.5mg, 37%).

$^1\text{H}$  NMR (400 MHz,  $\text{CDCl}_3$ )  $\delta$  8.54 (d,  $J$  = 4.4 Hz, 1H), 7.68 (td,  $J$  = 8.0, 2.0 Hz, 1H), 7.47 (d,  $J$  = 8.0 Hz, 1H), 7.16 (ddd,  $J$  = 7.2, 4.8, 0.8 Hz, 1H), 5.06 (dd,  $J$  = 9.2, 5.2 Hz, 1H), 1.87 – 1.72 (m, 1H), 1.71 – 1.62 (m, 1H), 1.62 – 1.52 (m, 1H), 1.22 (s, 9H), 0.99 (d,  $J$  = 6.4 Hz, 3H), 0.95 (d,  $J$  = 6.4 Hz, 3H).  $^{13}\text{C}$  NMR (100 MHz,  $\text{CDCl}_3$ )  $\delta$  162.58, 148.80, 136.53, 122.30, 121.09, 85.27, 80.41, 43.97, 26.60, 25.02, 23.46, 22.48. IR ( $\text{cm}^{-1}$ ): 2957, 2932, 2870, 1591, 1470, 1385, 1362, 1197. HRMS: calcd. for  $\text{C}_{14}\text{H}_{23}\text{NO}_2\text{Na}^+$   $[\text{M}+\text{Na}]^+$ : 260.1621; Found: 260.1624.

**(3q) 2-(1-(tert-butylperoxy)-3-methylbutyl)thiophene**

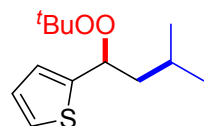

The title compound was prepared according to the general procedure described above but prolong time to 24 hours by the reaction between 2-vinylthiophene (**1q**) with TBHP and isobutyraldehyde (**2a**), and purified by flash column chromatography as colorless oil (15.5mg, 32%).

$^1\text{H}$  NMR (400 MHz,  $\text{CDCl}_3$ )  $\delta$  7.27 – 7.24 (m, 1H), 7.02 (dd,  $J$  = 3.2, 0.8 Hz, 1H), 6.96 (dd,  $J$  = 4.8, 3.2 Hz, 1H), 5.12 (t,  $J$  = 7.2 Hz, 1H), 1.94 – 1.84 (m, 1H), 1.74 – 1.59 (m, 2H), 1.18 (s, 9H), 0.94 (dd,  $J$  = 6.4, 4.0 Hz, 6H).  $^{13}\text{C}$  NMR (100 MHz,  $\text{CDCl}_3$ )  $\delta$  145.19, 126.37, 125.70, 124.95, 80.26,



79.51, 44.08, 26.56, 25.12, 23.01, 22.67. IR (cm<sup>-1</sup>): 2958, 2930, 2870, 1467, 1385, 1363, 1197, 697. HRMS: calcd. for C<sub>13</sub>H<sub>22</sub>SO<sub>2</sub>Na<sup>+</sup> [M+Na]<sup>+</sup>: 265.1233; Found: 265.1236.

**(4b) (1-(*tert*-butylperoxy)-3,3-dimethylbutyl)benzene** <sup>1</sup>

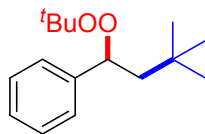

The title compound was prepared according to the general procedure described above by the reaction between styrene (**1a**) with TBHP and pivaldehyde (**2b**), and purified by flash column chromatography as colorless oil (39.5mg, 79%).

<sup>1</sup>H NMR (400 MHz, CDCl<sub>3</sub>) δ 7.36 – 7.22 (m, 5H), 4.94 (dd, *J* = 8.0, 4.4 Hz, 1H), 1.77 (dd, *J* = 14.8, 8.0 Hz, 1H), 1.52 (dd, *J* = 14.8, 4.4 Hz, 1H), 1.17 (s, 9H), 0.96 (s, 9H). <sup>13</sup>C NMR (100 MHz, CDCl<sub>3</sub>) δ 143.88, 128.15, 127.30, 126.99, 83.40, 79.50, 49.47, 30.49, 30.32, 26.83. IR (cm<sup>-1</sup>): 3030, 2955, 2868, 1455, 1362, 1198, 698.

**(4c) (1-(*tert*-butylperoxy)-3-methylpentyl)benzene**

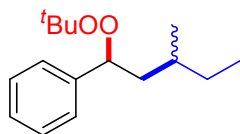

The title compound was prepared according to the general procedure described above by the reaction between styrene (**1a**) with TBHP and 2-methylbutanal (**2c**), and purified by flash column chromatography as colorless oil (36.5 mg, 73%, dr ≈ 1:1).

<sup>1</sup>H NMR (400 MHz, CDCl<sub>3</sub>) δ 7.37 – 7.24 (m, 5H), 4.95 – 4.90 (m, 1H), 1.90 – 1.81 (m, 0.55×1H), 1.75 – 1.59 (m, 1H), 1.54 – 1.47 (m, 0.49×1H), 1.45 – 1.28 (m, 2H), 1.25 – 1.20 (m, 0.45×1H), 1.19 (s, 4.76×1H), 1.18 (s, 4.30×H), 1.17 – 1.11 (m, 0.52×1H), 0.95 – 0.78 (m, 6H). <sup>13</sup>C NMR (100 MHz, CDCl<sub>3</sub>) δ 142.83, 142.07, 128.23, 128.22, 127.62, 127.45, 127.22, 126.88, 84.57, 83.99, 80.06, 80.05, 42.86, 41.83, 31.24, 31.23, 29.77, 26.67, 26.65, 19.54, 19.51, 11.22. IR (cm<sup>-1</sup>): 2964, 2930, 2875, 1455, 1362, 1197, 699. HRMS: calcd. for C<sub>12</sub>H<sub>17</sub>O<sup>+</sup> [M-<sup>t</sup>BuO]<sup>+</sup>: 177.1274; Found: 177.1275.

**(4d) (1-(*tert*-butylperoxy)-3-ethylpentyl)benzene**

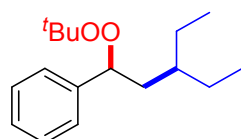

The title compound was prepared according to the general procedure described above by the reaction between styrene (**1a**) with TBHP and 2-ethylbutanal (**2d**), and purified by flash column chromatography as colorless oil (32.7 mg, 62%).

<sup>1</sup>H NMR (400 MHz, CDCl<sub>3</sub>) δ 7.38 – 7.22 (m, 5H), 4.90 (t, *J* = 7.2 Hz, 1H), 1.84 – 1.74 (m, 1H), 1.57 – 1.49 (m, 1H), 1.43 – 1.26 (m, 5H), 1.19 (s, 9H), 0.89 – 0.76 (m, 6H). <sup>13</sup>C NMR (100 MHz, CDCl<sub>3</sub>) δ 142.53, 128.22, 127.53, 127.05, 84.40, 80.05, 38.88, 37.06, 26.66, 25.64, 25.60, 10.70, 10.62. IR (cm<sup>-1</sup>): 2963, 2932, 2875, 1455, 1362, 1198, 698. HRMS: calcd. for C<sub>13</sub>H<sub>19</sub>O<sup>+</sup> [M-<sup>t</sup>BuO]<sup>+</sup>: 191.1430; Found: 191.1434.

**(4e) (1-(*tert*-butylperoxy)-3-methylhexyl)benzene**



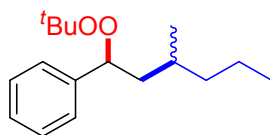

The title compound was prepared according to the general procedure described above by the reaction between styrene (**1a**) with TBHP and 2-methylpentanal (**2e**), and purified by flash column chromatography as colorless oil (36.9 mg, 70%, dr  $\approx$  1:1).

$^1\text{H}$  NMR (400 MHz,  $\text{CDCl}_3$ )  $\delta$  7.38 – 7.22 (m, 5H), 4.92 (m, 1H), 1.89 – 1.79 (m, 0.47 $\times$ 1H), 1.75 – 1.59 (m, 1.54 $\times$ 1H), 1.44 – 1.21 (m, 4H), 1.19 (s, 4.27 $\times$ 1H), 1.18 (s, 4.73 $\times$ 1H), 1.16 – 1.01 (m, 1H), 0.97 – 0.77 (m, 6H).  $^{13}\text{C}$  NMR (100 MHz,  $\text{CDCl}_3$ )  $\delta$  142.86, 142.07, 128.23, 128.22, 127.62, 127.43, 127.22, 126.86, 84.54, 83.97, 80.05, 80.03, 43.29, 42.20, 39.60, 29.47, 29.43, 26.67, 26.65, 20.07, 20.03, 19.99, 14.43, 14.41. IR ( $\text{cm}^{-1}$ ): 2958, 2929, 2872, 1454, 1362, 1198, 698. HRMS: calcd. for  $\text{C}_{13}\text{H}_{19}\text{O}^+$  [ $\text{M}-t\text{BuO}$ ] $^+$ : 191.1430; Found: 191.1433.

**(4f) (1-(tert-butylperoxy)-3-ethylheptyl)benzene**

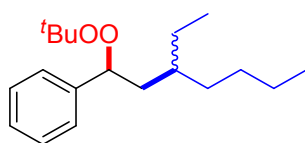

The title compound was prepared according to the general procedure described above by the reaction between styrene (**1a**) with TBHP and 2-ethylhexanal (**2f**), and purified by flash column chromatography as colorless oil (37.4 mg, 64%, dr  $\approx$  1:1).

$^1\text{H}$  NMR (400 MHz,  $\text{CDCl}_3$ )  $\delta$  7.38 – 7.22 (m, 5H), 4.90 (t,  $J$  = 7.2 Hz, 1H), 1.86 – 1.73 (m, 1H), 1.57 – 1.49 (m, 1H), 1.42 – 1.20 (m, 9H), 1.19 (s, 9H), 0.94 – 0.77 (m, 6H).  $^{13}\text{C}$  NMR (100 MHz,  $\text{CDCl}_3$ )  $\delta$  142.59, 142.49, 128.21, 127.52, 127.51, 127.07, 127.03, 84.44, 84.38, 80.02, 39.39, 39.25, 35.65, 33.06, 33.01, 28.75, 28.67, 26.66, 26.18, 26.12, 23.21, 23.17, 14.28, 10.67, 10.56. IR ( $\text{cm}^{-1}$ ): 2960, 2929, 2873, 1455, 1362, 1198, 698. HRMS: calcd. for  $\text{C}_{19}\text{H}_{32}\text{O}_2\text{Na}^+$  [ $\text{M}+\text{Na}$ ] $^+$ : 315.2295, Found: 315.2275.

**(4g) 1-(4-(tert-butylperoxy)-2-methyl-4-phenylbutyl)-4-isopropylbenzene**

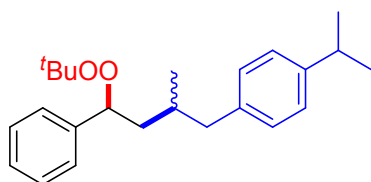

The title compound was prepared according to the general procedure described above by the reaction between styrene (**1a**) with TBHP and 3-(4-isopropylphenyl)-2-methylpropanal (**2g**), and purified by flash column chromatography as colorless oil (51.7mg, 73%, dr  $\approx$  1:1).

$^1\text{H}$  NMR (400 MHz,  $\text{CDCl}_3$ )  $\delta$  7.36 – 7.24 (m, 5H), 7.14 – 6.97 (m, 4H), 4.99 – 4.88 (m, 1H), 2.94 – 2.79 (m, 1H), 2.771 – 2.61 (m, 1H), 2.40 – 2.27 (m, 1H), 2.00 – 1.84 (m, 1H), 1.80 – 1.64 (m, 1.5 $\times$ 1H), 1.50 – 1.42 (m, 0.5 $\times$ 1H), 1.23 (d,  $J$  = 6.8 Hz, 6H), 1.19 (s, 9H), 0.90 (dd,  $J$  = 6.4, 4.8 Hz, 3H).  $^{13}\text{C}$  NMR (100 MHz,  $\text{CDCl}_3$ )  $\delta$  146.39, 146.37, 142.49, 141.64, 138.30, 138.25, 129.24, 128.26, 128.23, 127.70, 127.56, 127.35, 127.00, 126.29, 126.26, 84.56, 84.03, 80.07, 43.39, 43.35, 42.89, 41.61, 33.83, 31.81, 31.79, 26.69, 24.22, 19.99, 19.96. IR ( $\text{cm}^{-1}$ ): 2960, 2928, 2870, 1454, 1362, 1197, 698. HRMS: calcd. for  $\text{C}_{24}\text{H}_{34}\text{O}_2\text{Na}^+$  [ $\text{M}+\text{Na}$ ] $^+$ : 377.2451; Found: 377.2445.

**(4h) (1-(tert-butylperoxy)-2-cyclopentylethyl)benzene**

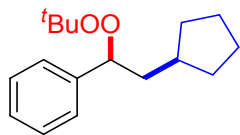

The title compound was prepared according to the general procedure described above by the reaction between styrene (**1a**) with TBHP and cyclopentanecarbaldehyde (**2h**), and purified by flash column chromatography as colorless oil (29.3 mg, 56%).

$^1\text{H}$  NMR (400 MHz,  $\text{CDCl}_3$ )  $\delta$  7.38 – 7.22 (m, 5H), 4.85 (t,  $J$  = 7.2 Hz, 1H), 1.94 – 1.84 (m, 1H), 1.84 – 1.70 (m, 3H), 1.70 – 1.40 (m, 5H), 1.19 (s, 9H), 1.16 – 1.08 (m, 2H).  $^{13}\text{C}$  NMR (100 MHz,  $\text{CDCl}_3$ )  $\delta$  142.27, 128.21, 127.56, 127.10, 85.63, 80.08, 41.71, 36.75, 33.19, 32.92, 26.65, 25.30, 25.17. IR ( $\text{cm}^{-1}$ ): 3030, 2950, 2868, 1454, 1362, 1197, 698. HRMS: calcd. for  $\text{C}_{13}\text{H}_{17}\text{O}^+$  [ $\text{M} - \text{tBuO}$ ] $^+$ : 189.1274; Found: 189.1278.

**(4i) (1-(tert-butylperoxy)-2-(cyclohex-3-en-1-yl)ethyl)benzene**

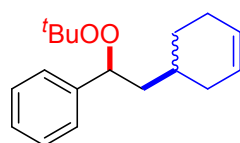

The title compound was prepared according to the general procedure described above by the reaction between styrene (**1a**) with TBHP and cyclohex-3-enecarbaldehyde (**2i**), and purified by flash column chromatography as colorless oil (24.7mg, 45%, dr  $\approx$  1:1).

$^1\text{H}$  NMR (400 MHz,  $\text{CDCl}_3$ )  $\delta$  7.38 – 7.22 (m, 5H), 5.63 (t,  $J$  = 12.8 Hz, 2H), 4.95 (dd,  $J$  = 7.6, 6.4 Hz, 1H), 2.14 (d,  $J$  = 15.2 Hz, 1H), 2.07 – 1.93 (m, 2H), 1.90 – 1.50 (m, 5H), 1.36 – 1.24 (m, 1H), 1.19 (s, 9H).  $^{13}\text{C}$  NMR (100 MHz,  $\text{CDCl}_3$ )  $\delta$  142.42, 142.22, 128.28, 128.26, 127.62, 127.58, 127.11, 127.07, 126.98, 126.44, 126.37, 83.91, 83.81, 80.12, 80.08, 42.29, 42.23, 32.19, 32.09, 30.38, 30.32, 29.17, 29.02, 26.67, 26.64, 25.09. IR ( $\text{cm}^{-1}$ ): 2977, 2924, 2837, 1453, 1362, 1197, 698. HRMS: calcd. for  $\text{C}_{14}\text{H}_{17}\text{O}^+$  [ $\text{M} - \text{tBuO}$ ] $^+$ : 201.1274; Found: 201.1277.

**(4j) (1-(tert-butylperoxy)propane-1,3-diyl)dibenzene**

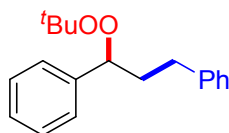

The title compound was prepared according to the general procedure described above by the reaction between styrene (**1a**) with TBHP and 2-phenylacetaldehyde (**2j**), and purified by flash column chromatography as colorless oil (19.3mg, 34%).

$^1\text{H}$  NMR (400 MHz,  $\text{CDCl}_3$ )  $\delta$  7.37 – 7.22 (m, 7H), 7.19 – 7.13 (m, 3H), 4.86 (t,  $J$  = 6.8 Hz, 1H), 2.77 – 2.57 (m, 2H), 2.30 – 2.19 (m, 1H), 2.06 – 1.94 (m, 1H), 1.20 (s, 9H).  $^{13}\text{C}$  NMR (100 MHz,  $\text{CDCl}_3$ )  $\delta$  141.89, 141.47, 128.48, 128.33, 127.79, 127.17, 125.98, 85.37, 80.28, 36.65, 32.18, 26.66. IR ( $\text{cm}^{-1}$ ): 3027, 2977, 2929, 1454, 1362, 1198, 698. HRMS: calcd. for  $\text{C}_{19}\text{H}_{24}\text{O}_2\text{Na}^+$  [ $\text{M} + \text{Na}$ ] $^+$ : 307.1669; Found: 307.1681.

**(4k) (1-(tert-butylperoxy)pentyl)benzene**

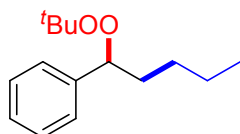

The title compound was prepared according to the general procedure described above by the reaction

between styrene (**1a**) with TBHP and *n*-butanal (**2k**), and purified by flash column chromatography as colorless oil (7.1mg, 15%).

<sup>1</sup>H NMR (400 MHz, CDCl<sub>3</sub>)  $\delta$  7.36 – 7.26 (m, 5H), 4.81 (t, *J* = 6.8 Hz, 1H), 1.95 – 1.82 (m, 1H), 1.72 – 1.57 (m, 1H), 1.37 – 1.22 (m, 4H), 1.20 (s, 9H), 0.87 (t, *J* = 6.8 Hz, 3H). <sup>13</sup>C NMR (100 MHz, CDCl<sub>3</sub>)  $\delta$  142.05, 128.23, 127.58, 127.08, 86.20, 80.21, 34.98, 28.21, 26.65, 22.85, 14.08. IR (cm<sup>-1</sup>): 2931, 1454, 1362, 1197, 698.

**(5a) 3-methyl-1-phenylbutan-1-one**

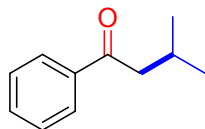

The title compound was prepared according to the general procedure described above by the reaction between styrene (**1a**) with TBHP and isobutyraldehyde (**2a**) and DBU, and purified by flash column chromatography as colorless oil (23.0mg, 71%).

<sup>1</sup>H NMR (400 MHz, CDCl<sub>3</sub>)  $\delta$  8.00 – 7.91 (m, 2H), 7.59 – 7.52 (m, 1H), 7.50 – 7.43 (m, 2H), 2.84 (d, *J* = 6.8 Hz, 2H), 2.38 – 2.22 (m, 1H), 1.00 (d, *J* = 6.4 Hz, 6H). <sup>13</sup>C NMR (100 MHz, CDCl<sub>3</sub>)  $\delta$  200.46, 137.55, 132.99, 128.68, 128.25, 47.66, 25.31, 22.91. IR (cm<sup>-1</sup>): 2957, 2929, 2871, 1687, 1213, 751, 691.

**(5b) 3,3-dimethyl-1-phenylbutan-1-one**

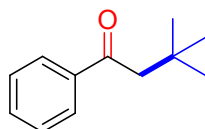

The title compound was prepared according to the general procedure described above by the reaction between styrene (**1a**) with TBHP and pivaldehyde (**2b**) and DBU, and purified by flash column chromatography as colorless oil (30.6mg, 87%).

<sup>1</sup>H NMR (400 MHz, CDCl<sub>3</sub>)  $\delta$  7.97 – 7.90 (m, 2H), 7.59 – 7.50 (m, 1H), 7.49 – 7.39 (m, 2H), 2.87 (s, 2H), 1.07 (s, 9H). <sup>13</sup>C NMR (100 MHz, CDCl<sub>3</sub>)  $\delta$  200.66, 138.75, 132.84, 128.62, 128.36, 50.22, 31.56, 30.23. IR (cm<sup>-1</sup>): 2955, 2868, 1675, 1448, 749, 690.

**(5c) 3-methyl-1-phenylpentan-1-one**

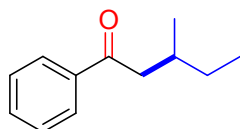

The title compound was prepared according to the general procedure described above by the reaction between styrene (**1a**) with TBHP and 2-methylbutanal (**2c**) and DBU, and purified by flash column chromatography as colorless oil (25.0mg, 71%).

<sup>1</sup>H NMR (400 MHz, CDCl<sub>3</sub>)  $\delta$  8.01 – 7.91 (m, 2H), 7.60 – 7.52 (m, 1H), 7.50 – 7.40 (m, 2H), 2.96 (dd, *J* = 15.6, 5.6 Hz, 1H), 2.75 (dd, *J* = 15.6, 8.0 Hz, 1H), 2.18 – 2.00 (m, 1H), 1.53 – 1.35 (m, 1H), 1.35 – 1.19 (m, 1H), 0.94 (dd, *J* = 14.4, 6.8 Hz, 6H). <sup>13</sup>C NMR (100 MHz, CDCl<sub>3</sub>)  $\delta$  200.70, 137.63, 132.97, 128.68, 128.25, 45.76, 31.56, 29.87, 19.68, 11.56. IR (cm<sup>-1</sup>): 2961, 2928, 2875, 1686, 1206, 750, 690.

**(5d) 3-ethyl-1-phenylpentan-1-one**

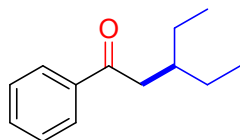

The title compound was prepared according to the general procedure described above by the reaction between styrene (**1a**) with TBHP and 2-ethylbutanal (**2d**) and DBU, and purified by flash column chromatography as colorless oil (30.8 mg, 81%).

$^1\text{H}$  NMR (400 MHz,  $\text{CDCl}_3$ )  $\delta$  8.00 – 7.90 (m, 2H), 7.60 – 7.52 (m, 1H), 7.50 – 7.42 (m, 2H), 2.87 (d,  $J = 6.8$  Hz, 2H), 2.09 – 1.88 (m, 1H), 1.45 – 1.31 (m, 4H), 0.89 (t,  $J = 7.2$  Hz, 6H).  $^{13}\text{C}$  NMR (100 MHz,  $\text{CDCl}_3$ )  $\delta$  200.98, 137.61, 132.93, 128.66, 128.21, 42.76, 37.30, 26.11, 11.06. IR ( $\text{cm}^{-1}$ ): 2961, 2931, 2876, 1686, 1459, 1272, 1202, 690.

**(5e) 3-methyl-1-phenylhexan-1-one**

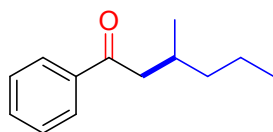

The title compound was prepared according to the general procedure described above by the reaction between styrene (**1a**) with TBHP and 2-methylpentanal (**2e**) and DBU, and purified by flash column chromatography as colorless oil (28.1 mg, 74%).

$^1\text{H}$  NMR (400 MHz,  $\text{CDCl}_3$ )  $\delta$  8.00 – 7.91 (m, 2H), 7.59 – 7.52 (m, 1H), 7.51 – 7.40 (m, 2H), 2.95 (dd,  $J = 16.0, 5.6$  Hz, 1H), 2.75 (dd,  $J = 16.0, 8.0$  Hz, 1H), 2.28 – 2.09 (m, 1H), 1.42 – 1.21 (m, 4H), 0.95 (d,  $J = 6.8$  Hz, 3H), 0.90 (t,  $J = 7.2$  Hz, 3H).  $^{13}\text{C}$  NMR (100 MHz,  $\text{CDCl}_3$ )  $\delta$  200.69, 137.60, 132.97, 128.68, 128.24, 46.15, 39.57, 29.71, 20.29, 20.13, 14.37. IR ( $\text{cm}^{-1}$ ): 2957, 2928, 2872, 1685, 1448, 751, 690.

**(5f) 3-ethyl-1-phenylheptan-1-one**

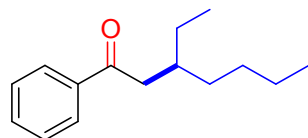

The title compound was prepared according to the general procedure described above by the reaction between styrene (**1a**) with TBHP and 2-ethylhexanal (**2f**) and DBU, and purified by flash column chromatography as colorless oil (31.4 mg, 72%).

$^1\text{H}$  NMR (400 MHz,  $\text{CDCl}_3$ )  $\delta$  7.98 – 7.93 (m, 2H), 7.60 – 7.51 (m, 1H), 7.51 – 7.43 (m, 2H), 2.92 – 2.81 (m, 2H), 2.15 – 1.97 (m, 1H), 1.51 – 1.19 (m, 8H), 0.92 – 0.85 (m, 6H).  $^{13}\text{C}$  NMR (100 MHz,  $\text{CDCl}_3$ )  $\delta$  201.00, 137.67, 132.94, 128.68, 128.23, 43.23, 35.84, 33.42, 29.04, 26.63, 23.11, 14.23, 11.05. IR ( $\text{cm}^{-1}$ ): 2958, 2928, 2872, 1684, 1448, 749, 690.

**(5h) 2-cyclopentyl-1-phenylethanone**

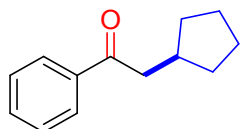

The title compound was prepared according to the general procedure described above by the reaction between styrene (**1a**) with TBHP and cyclopentanecarbaldehyde (**2h**) and DBU, and purified by flash column chromatography as colorless oil (29.7 mg, 79%).

$^1\text{H}$  NMR (400 MHz,  $\text{CDCl}_3$ )  $\delta$  8.00 – 7.92 (m, 2H), 7.59 – 7.51 (m, 1H), 7.50 – 7.41 (m, 2H), 2.99 (d,  $J = 7.2$  Hz, 2H), 2.48 – 2.30 (m, 1H), 1.98 – 1.79 (m, 2H), 1.72 – 1.49 (m, 4H), 1.32 – 1.08 (m,

2H).  $^{13}\text{C}$  NMR (100 MHz,  $\text{CDCl}_3$ )  $\delta$  200.60, 137.40, 132.97, 128.67, 128.25, 44.97, 36.22, 32.87, 25.13. IR ( $\text{cm}^{-1}$ ): 2950, 2867, 1685, 1448, 750, 690.

**(5i) 2-(cyclohex-3-en-1-yl)-1-phenylethanone**

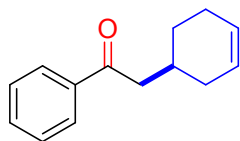

The title compound was prepared according to the general procedure described above by the reaction between styrene (**1a**) with TBHP and 1-cyclohexene-3-carboxaldehyde (**2i**) and DBU, and purified by flash column chromatography as colorless oil (22.8 mg, 57%).

$^1\text{H}$  NMR (400 MHz,  $\text{CDCl}_3$ )  $\delta$  8.01 – 7.92 (m, 2H), 7.61 – 7.53 (m, 1H), 7.50 – 7.43 (m, 2H), 5.75 – 5.59 (m, 2H), 2.93 (d,  $J$  = 7.2 Hz, 2H), 2.37 – 2.25 (m, 1H), 2.24 – 2.13 (m, 1H), 2.12 – 2.02 (m, 2H), 1.86 – 1.73 (m, 2H), 1.42 – 1.30 (m, 1H).  $^{13}\text{C}$  NMR (100 MHz,  $\text{CDCl}_3$ )  $\delta$  200.15, 137.51, 133.06, 128.70, 128.26, 127.06, 126.10, 45.20, 31.73, 30.29, 28.88, 24.90. IR ( $\text{cm}^{-1}$ ): 3022, 2914, 2836, 1686, 1448, 749, 689.

**(5k) 2-cyclohexyl-1-phenylethanone**

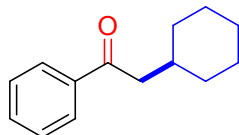

The title compound was prepared according to the general procedure described above by the reaction between styrene (**1a**) with TBHP and cyclohexanecarboxaldehyde (**2k**) and DBU, and purified by flash column chromatography as colorless oil (27.1mg, 67%).

$^1\text{H}$  NMR (400 MHz,  $\text{CDCl}_3$ )  $\delta$  8.01 – 7.88 (m, 2H), 7.59 – 7.52 (m, 1H), 7.51 – 7.43 (m, 2H), 2.83 (d,  $J$  = 6.8 Hz, 2H), 2.07 – 1.87 (m, 1H), 1.80 – 1.62 (m, 5H), 1.38 – 0.90 (m, 5H).  $^{13}\text{C}$  NMR (100 MHz,  $\text{CDCl}_3$ )  $\delta$  200.48, 137.60, 132.98, 128.67, 128.28, 46.37, 34.69, 33.58, 26.39, 26.29. IR ( $\text{cm}^{-1}$ ): 2922, 2851, 1685, 1448, 1286, 1193, 690.

**(6) 3-methyl-1-phenylbutan-1-ol**

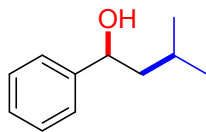

In a 2 necked-flask, Pd/C (10% dry on carbon, 20 mg) was introduced and the atmosphere was replaced with argon, **3a** (118 mg, 0.5 mmol) and acetonitrile (5 mL) was added. The atmosphere was then replaced with hydrogen and the reaction was reacted at room temperature under vigorous stirring for 1.5 hours. The mixture was filtered on Celite (washed by dichloromethane), and the resulting concentrated solution was purified by column chromatography using a mixture of hexanes and ethyl acetate to afford **6** (70 mg, 85% yield) as a clear oil.

$^1\text{H}$  NMR (400 MHz,  $\text{CDCl}_3$ )  $\delta$  7.38 – 7.24 (m, 5H), 4.74 (dd,  $J$  = 8.4, 6.0 Hz, 1H), 1.90 – 1.60 (m, 4H), 1.55 – 1.46 (m, 1H), 0.95 (dd,  $J$  = 6.4, 2.0 Hz, 6H).  $^{13}\text{C}$  NMR (100 MHz,  $\text{CDCl}_3$ )  $\delta$  145.34, 128.57, 127.59, 125.99, 72.87, 48.45, 24.90, 23.23, 22.38. IR ( $\text{cm}^{-1}$ ): 3373, 2955, 2925, 2868, 1467, 1056, 754, 699.

**(7a) 1-(tert-butyloxy)-4-methyl-1-phenylpentan-3-one**

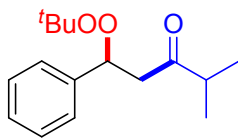

The title compound was prepared according to the general procedure described above by the reaction between styrene (**1a**) with TBHP and isobutyraldehyde (**2a**), and purified by flash column chromatography as colorless oil.

$^1\text{H}$  NMR (400 MHz,  $\text{CDCl}_3$ )  $\delta$  7.50 – 7.27 (m, 5H), 5.43 (dd,  $J$  = 7.6, 5.2 Hz, 1H), 3.16 (dd,  $J$  = 16.0, 7.6 Hz, 1H), 2.70 (dd,  $J$  = 16.0, 5.6 Hz, 1H), 2.66 – 2.53 (m, 1H), 1.20 (s, 9H), 1.08 (d,  $J$  = 6.8 Hz, 3H), 1.02 (d,  $J$  = 7.0 Hz, 3H).  $^{13}\text{C}$  NMR (100 MHz,  $\text{CDCl}_3$ )  $\delta$  211.66, 140.27, 128.50, 128.16, 127.09, 82.17, 80.87, 46.00, 41.78, 26.52, 17.88. IR ( $\text{cm}^{-1}$ ): 2974, 1714, 1466, 1363, 1196, 913, 747, 698. HRMS: calcd. for  $\text{C}_{16}\text{H}_{24}\text{O}_3\text{Na}^+$   $[\text{M}+\text{Na}]^+$ : 287.1618; Found: 287.1624.

#### (8a) (3-methylbut-1-en-1-yl)benzene <sup>2</sup>

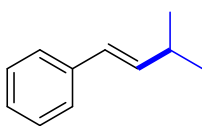

The title compound was prepared according to the general procedure described above by the reaction between styrene (**1a**) with TBHP and isobutyraldehyde (**2a**), and purified by flash column chromatography as colorless oil.

$^1\text{H}$  NMR (400 MHz,  $\text{CDCl}_3$ )  $\delta$  7.40 – 7.26 (m, 4H), 7.17 (t,  $J$  = 8.0 Hz, 1H), 6.34 (d,  $J$  = 16.0 Hz, 1H), 6.18 (dd,  $J$  = 16.0, 8.0 Hz, 1H), 2.48 – 2.43 (m, 1H), 1.10 (d,  $J$  = 8.0 Hz, 6H).  $^{13}\text{C}$  NMR (100 MHz,  $\text{CDCl}_3$ )  $\delta$  138.16, 138.09, 128.60, 126.95, 126.89, 126.10, 31.67, 22.59. IR ( $\text{cm}^{-1}$ ): 2959, 913, 744.

## V. References

<sup>1</sup> Weiping Liu, Yuanming Li, Kaisheng Liu, and Zhiping Li, *J. Am. Chem. Soc.* **2011**, *133*, 10756-10759.

<sup>2</sup> G. Cahiez, O. Gager, J. Buendia and C. Patinote, *Chem. Eur. J.* **2012**, *18*, 5860-5863.

## VI. Copies of $^1\text{H}$ and $^{13}\text{C}$ NMR spectra of products 3a-3q, 4b-4k, 5a-5k, 6, 7a, 8a

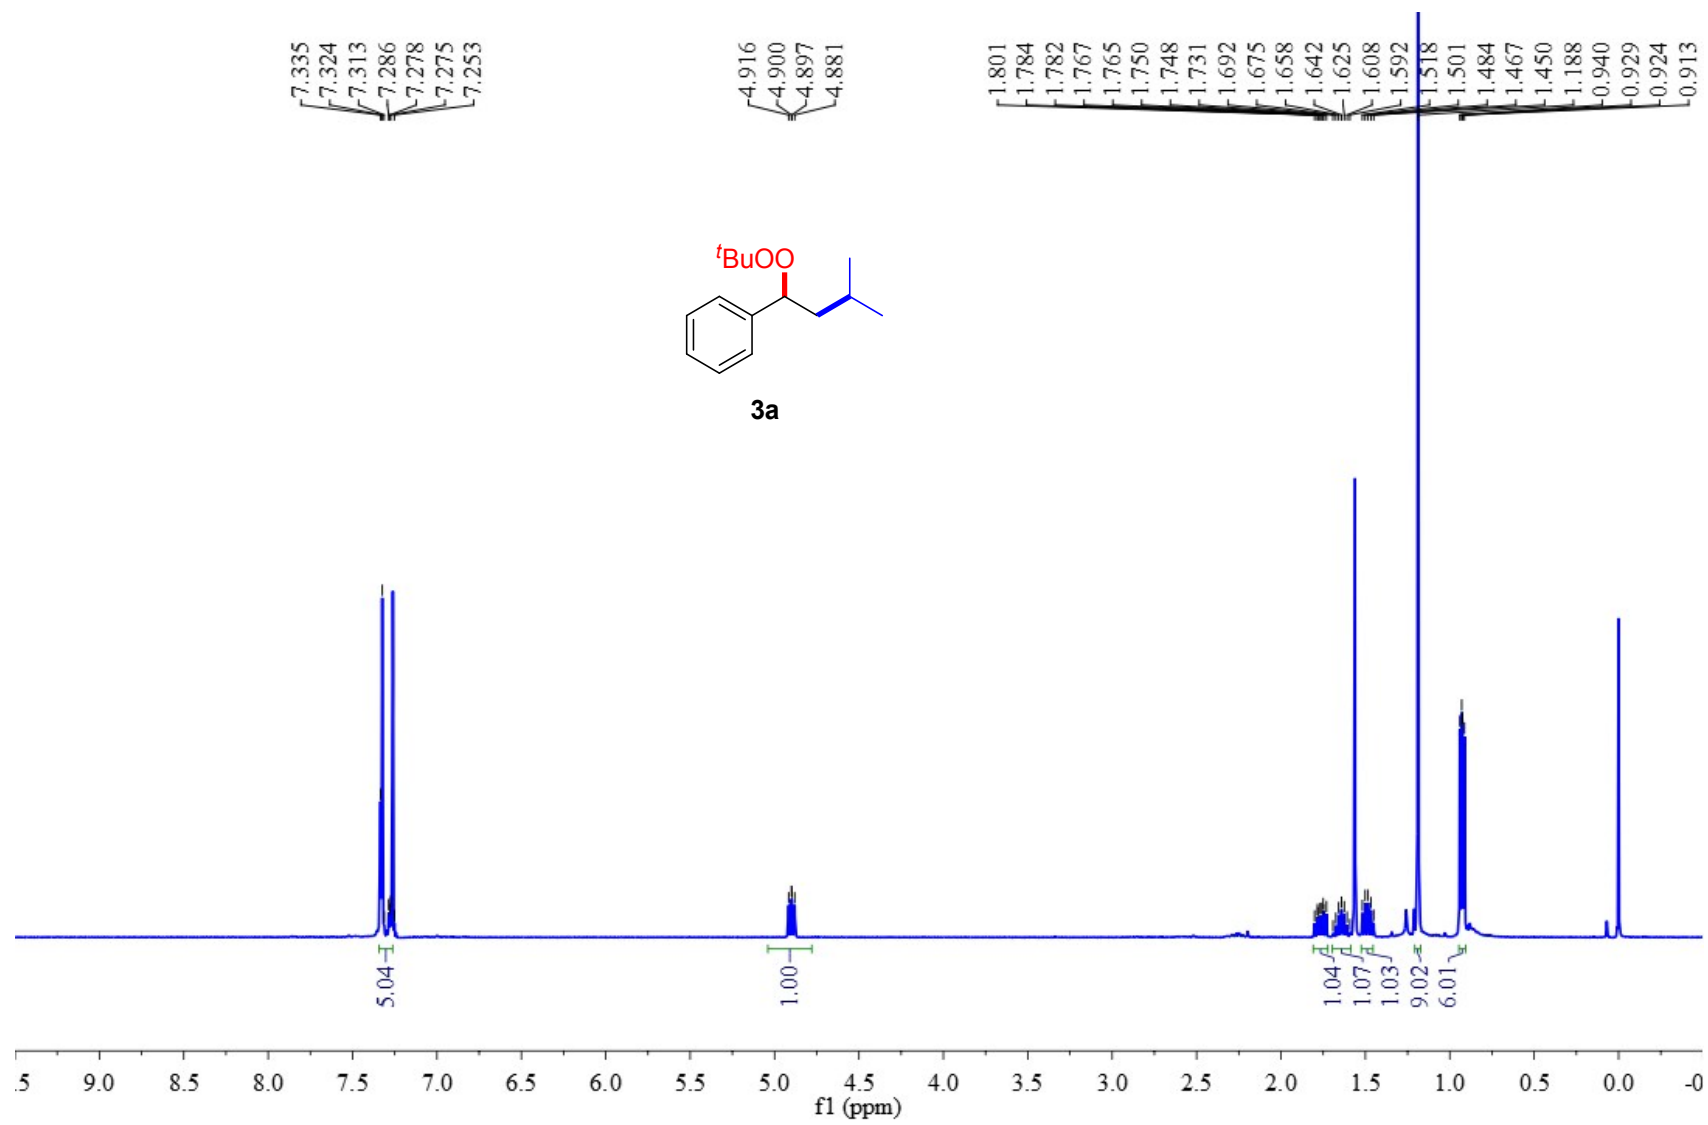



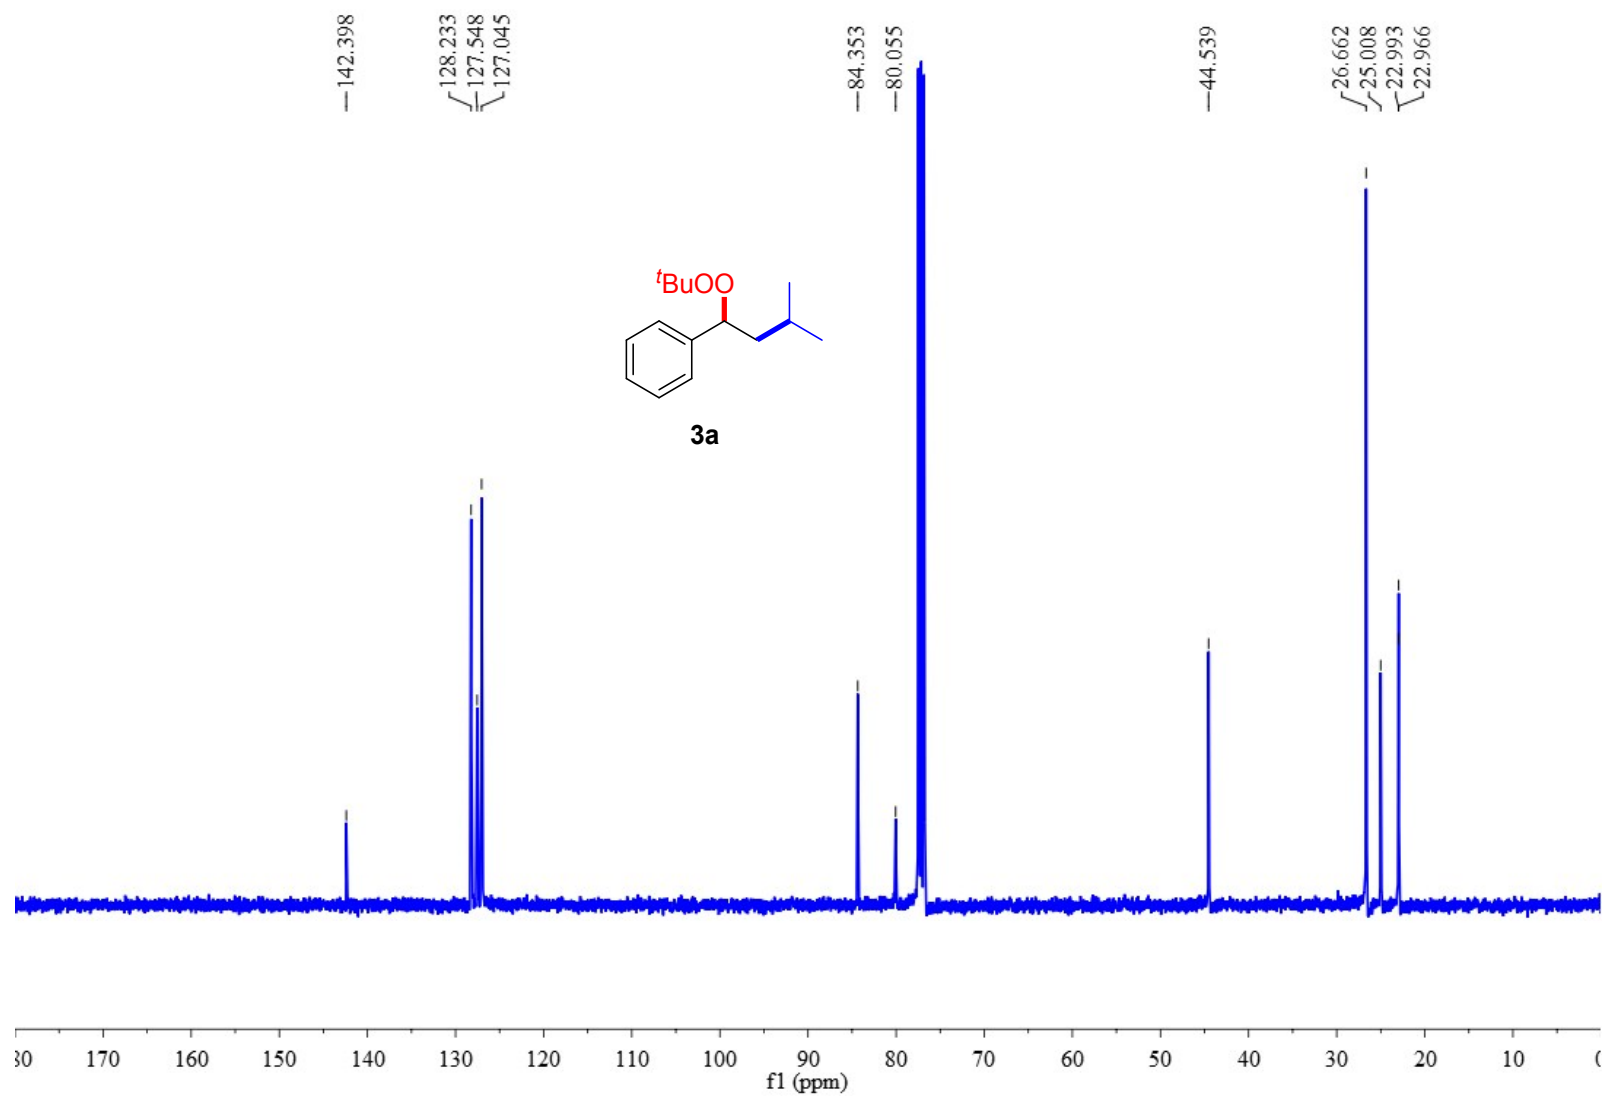

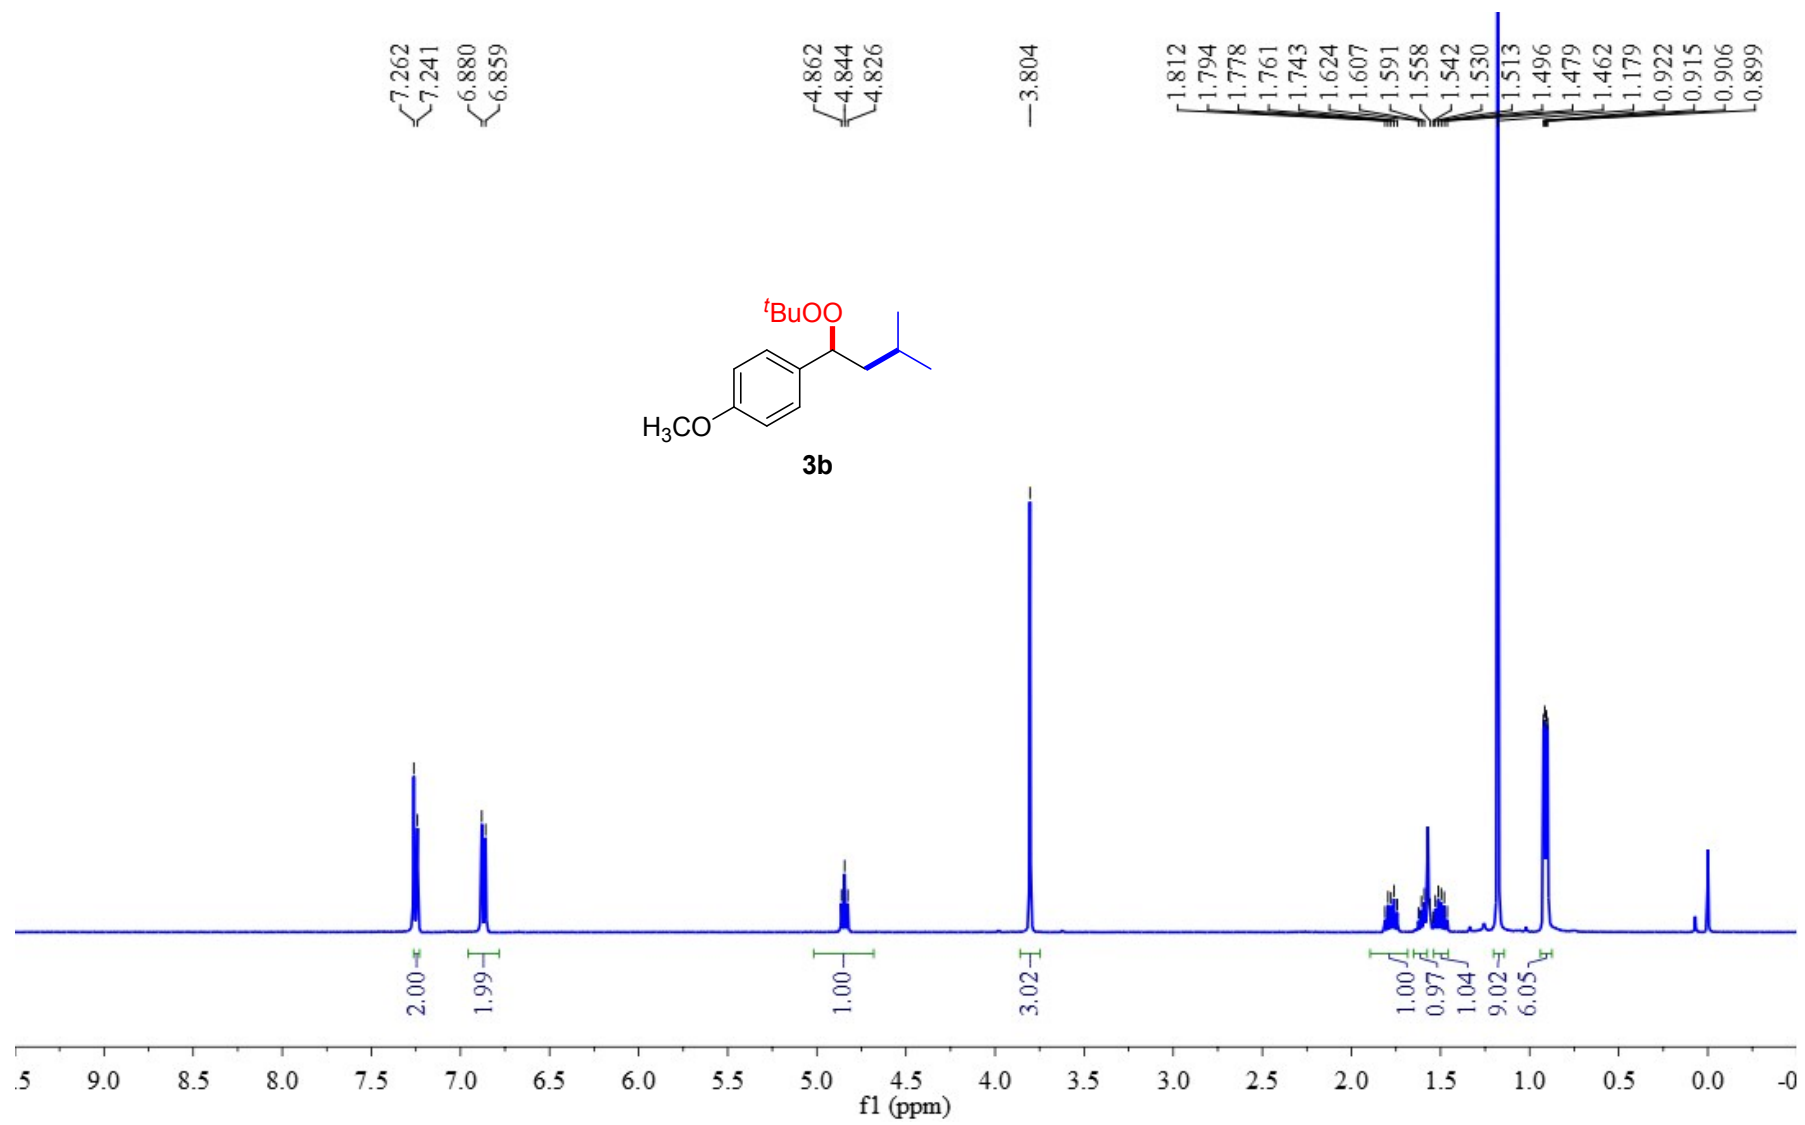

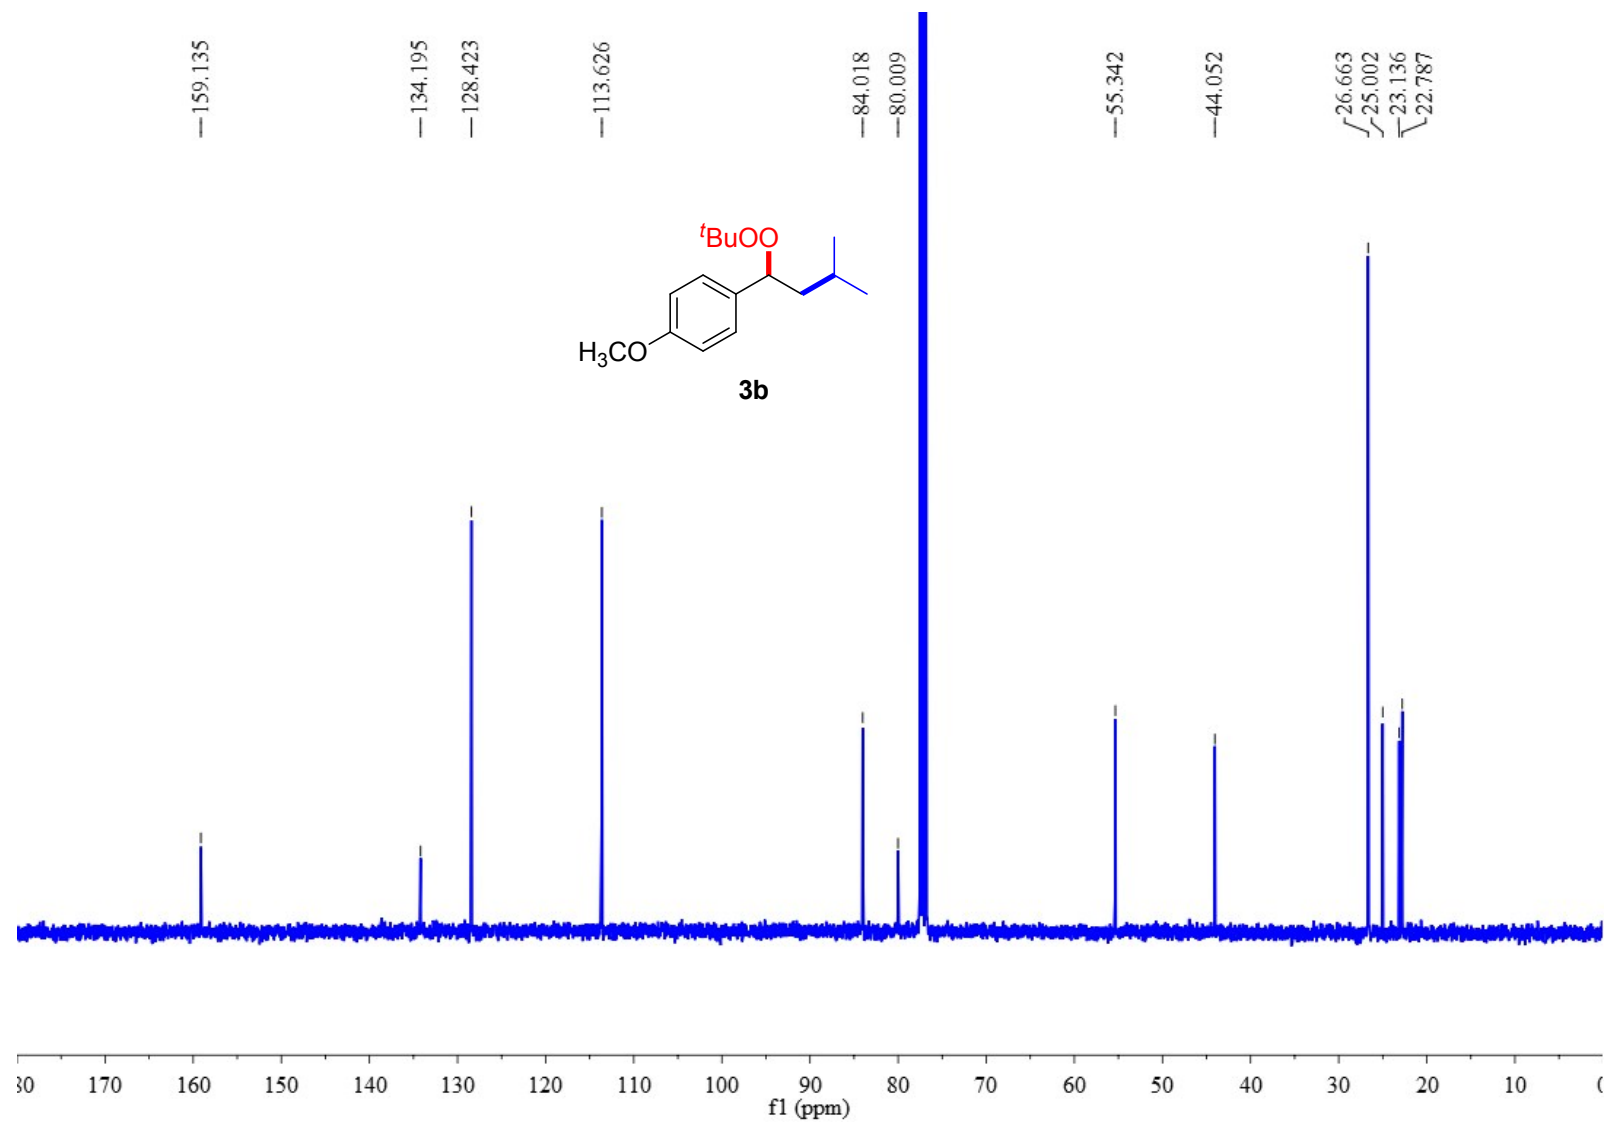

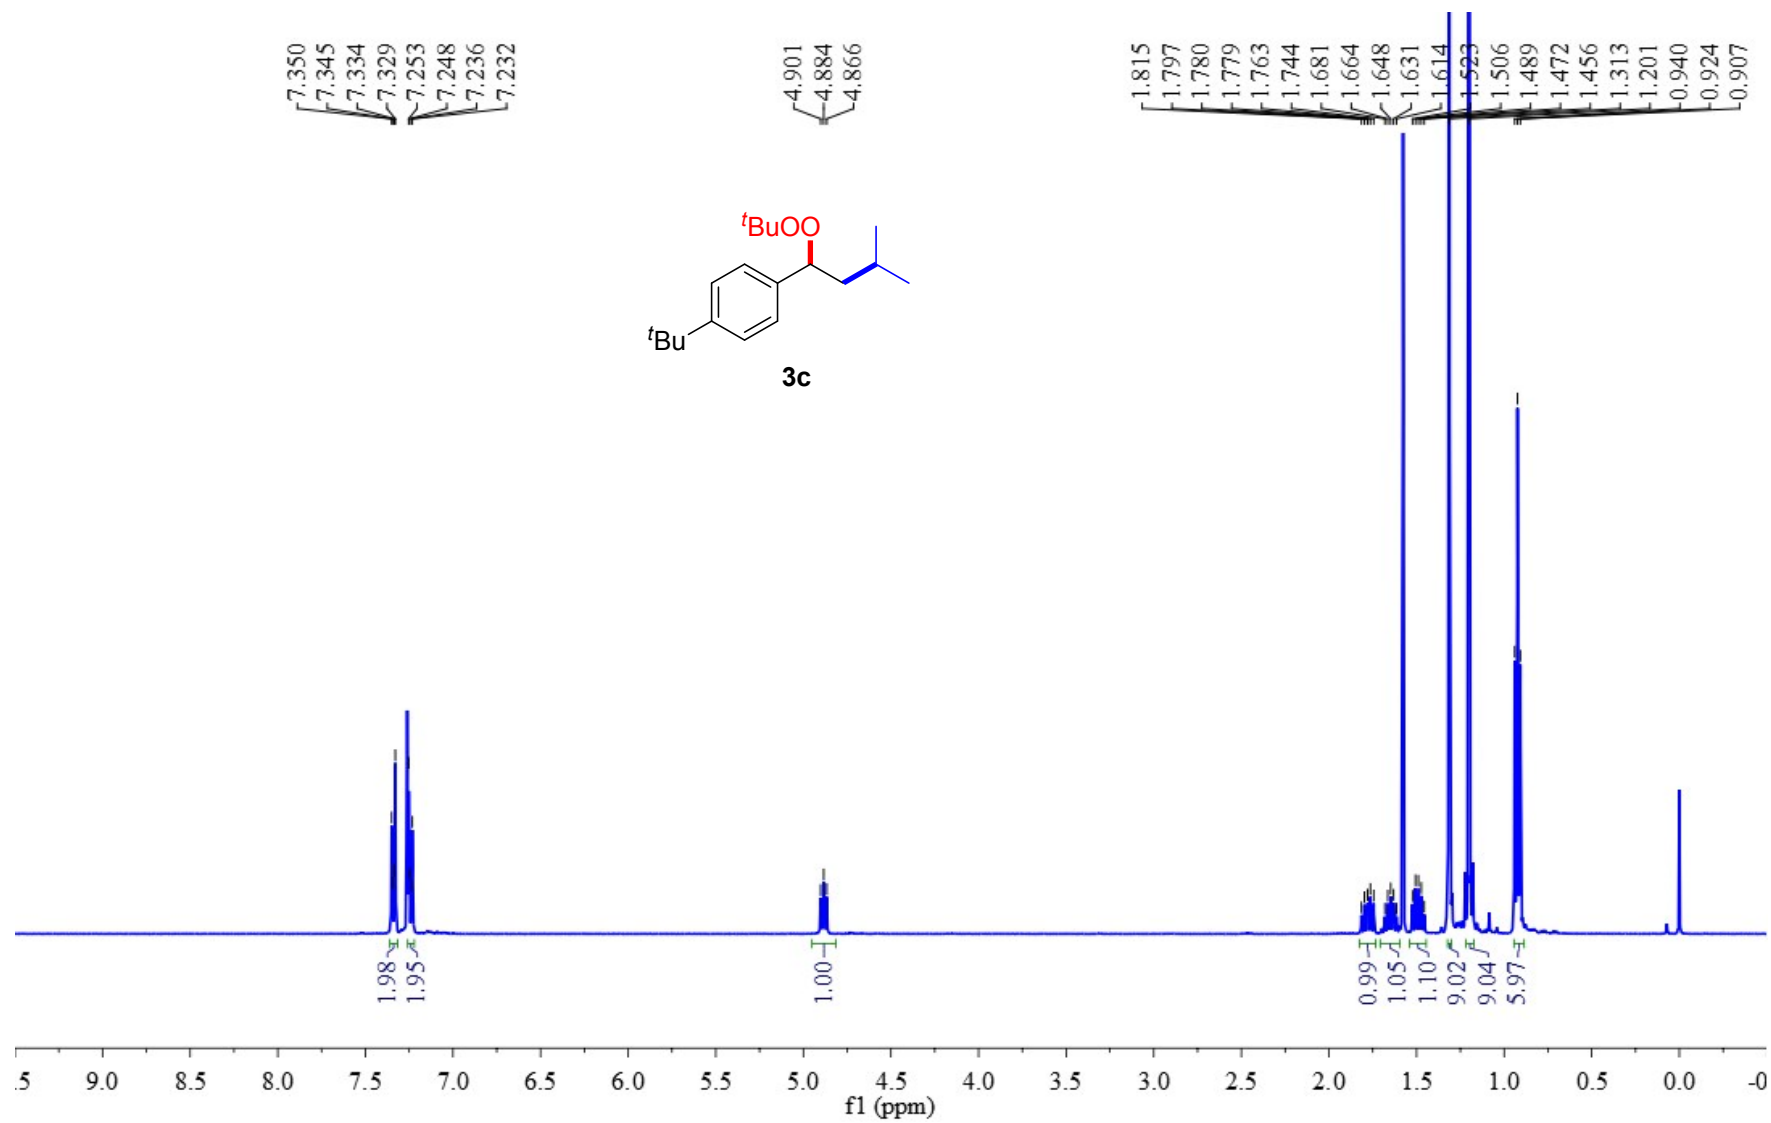

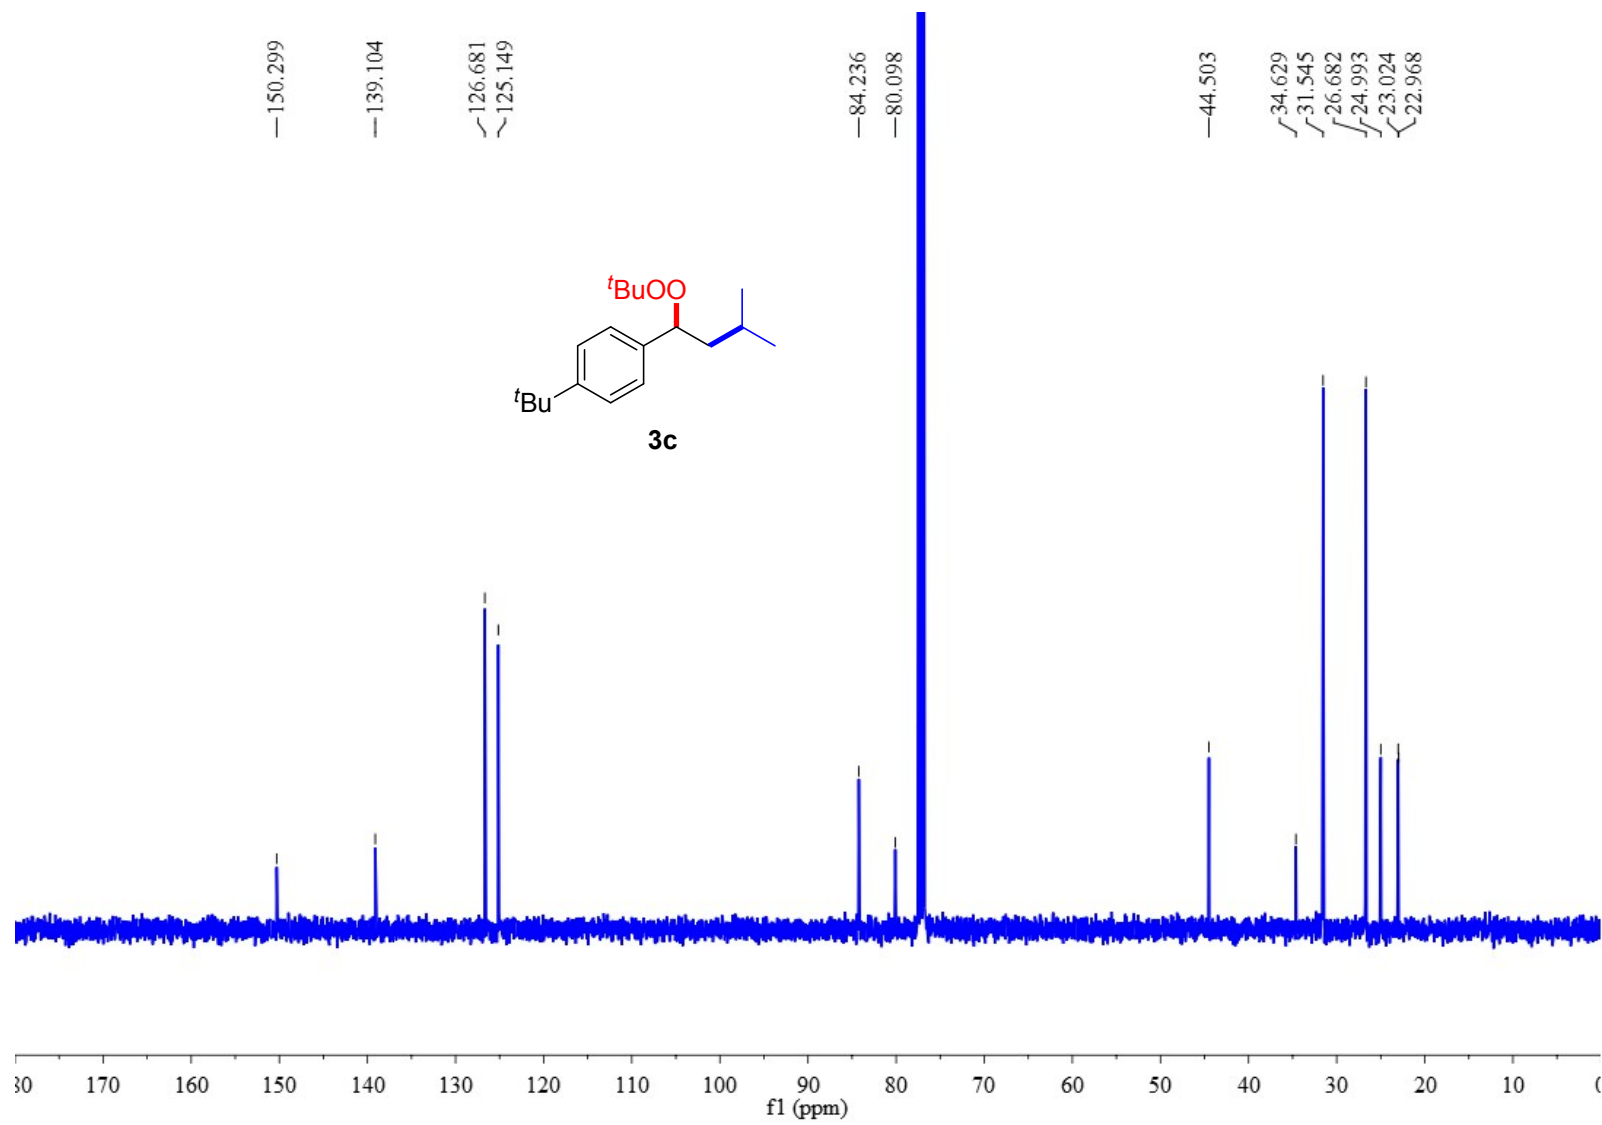

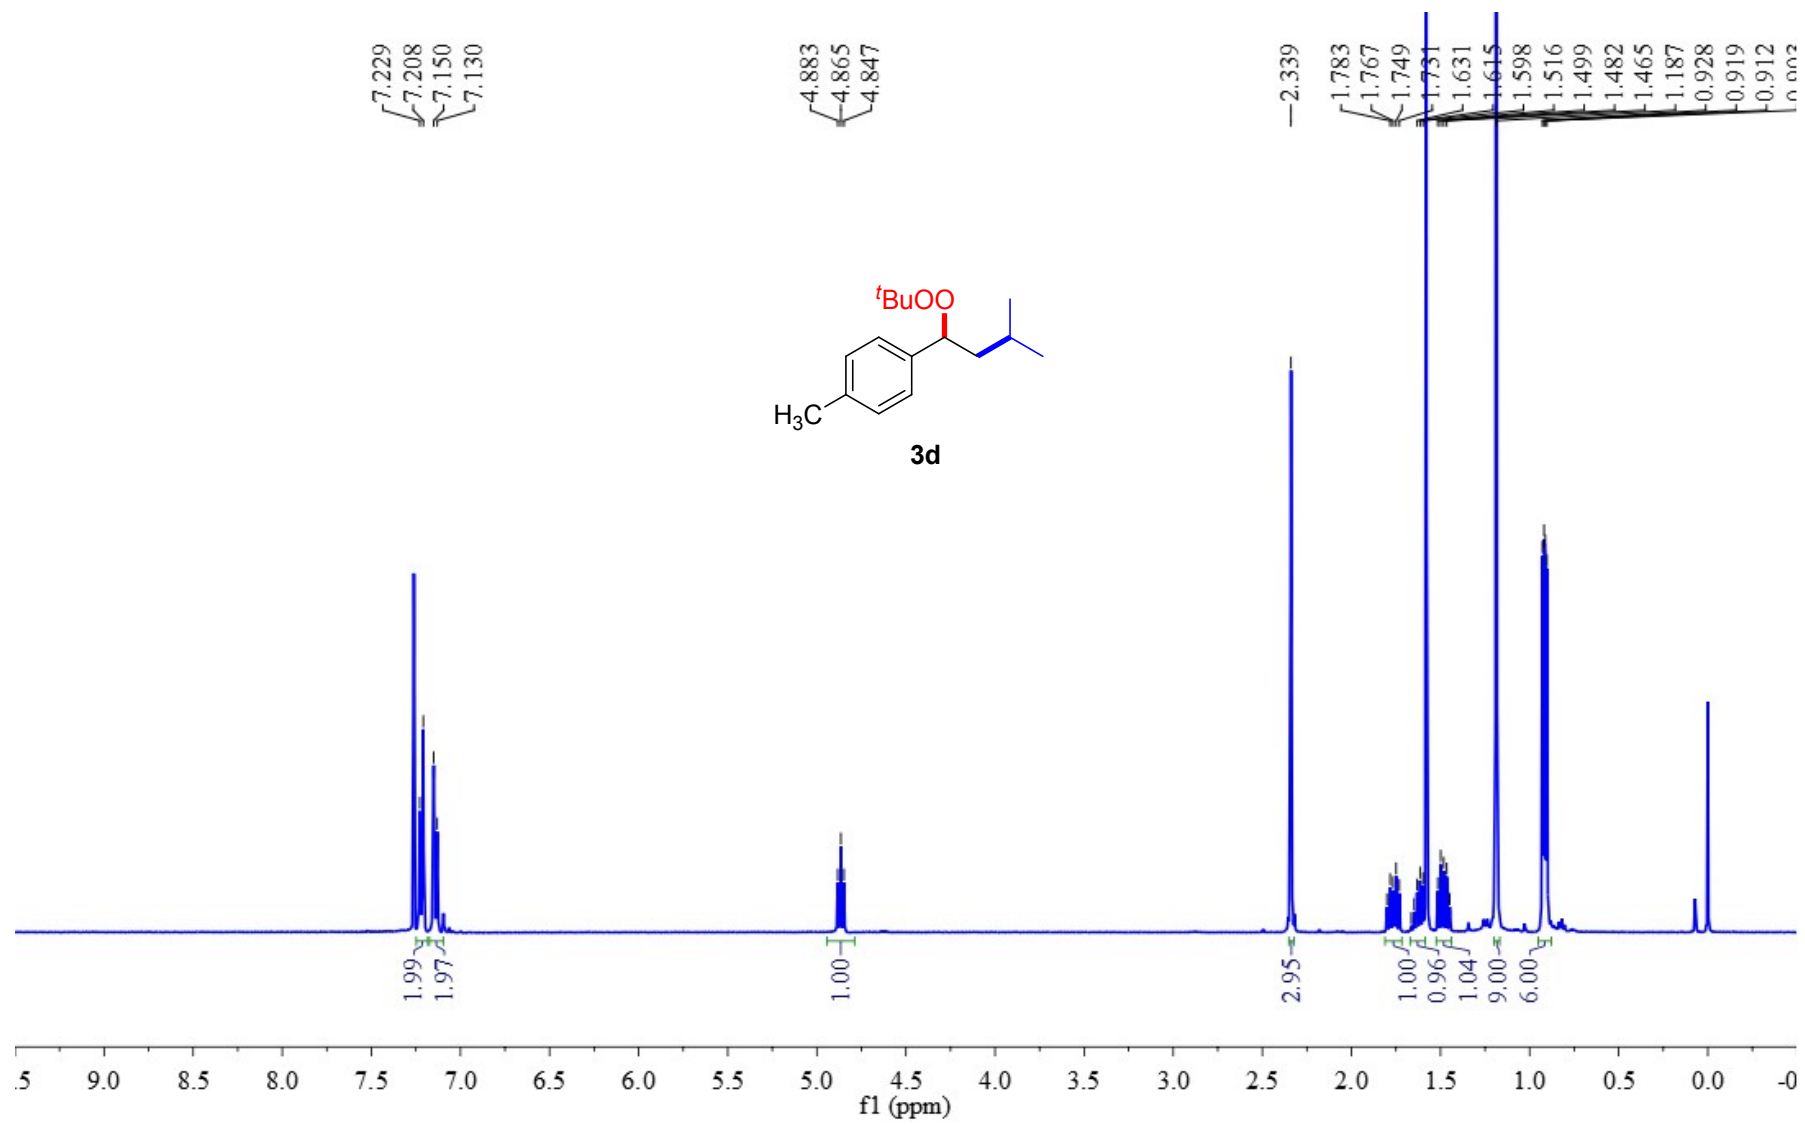

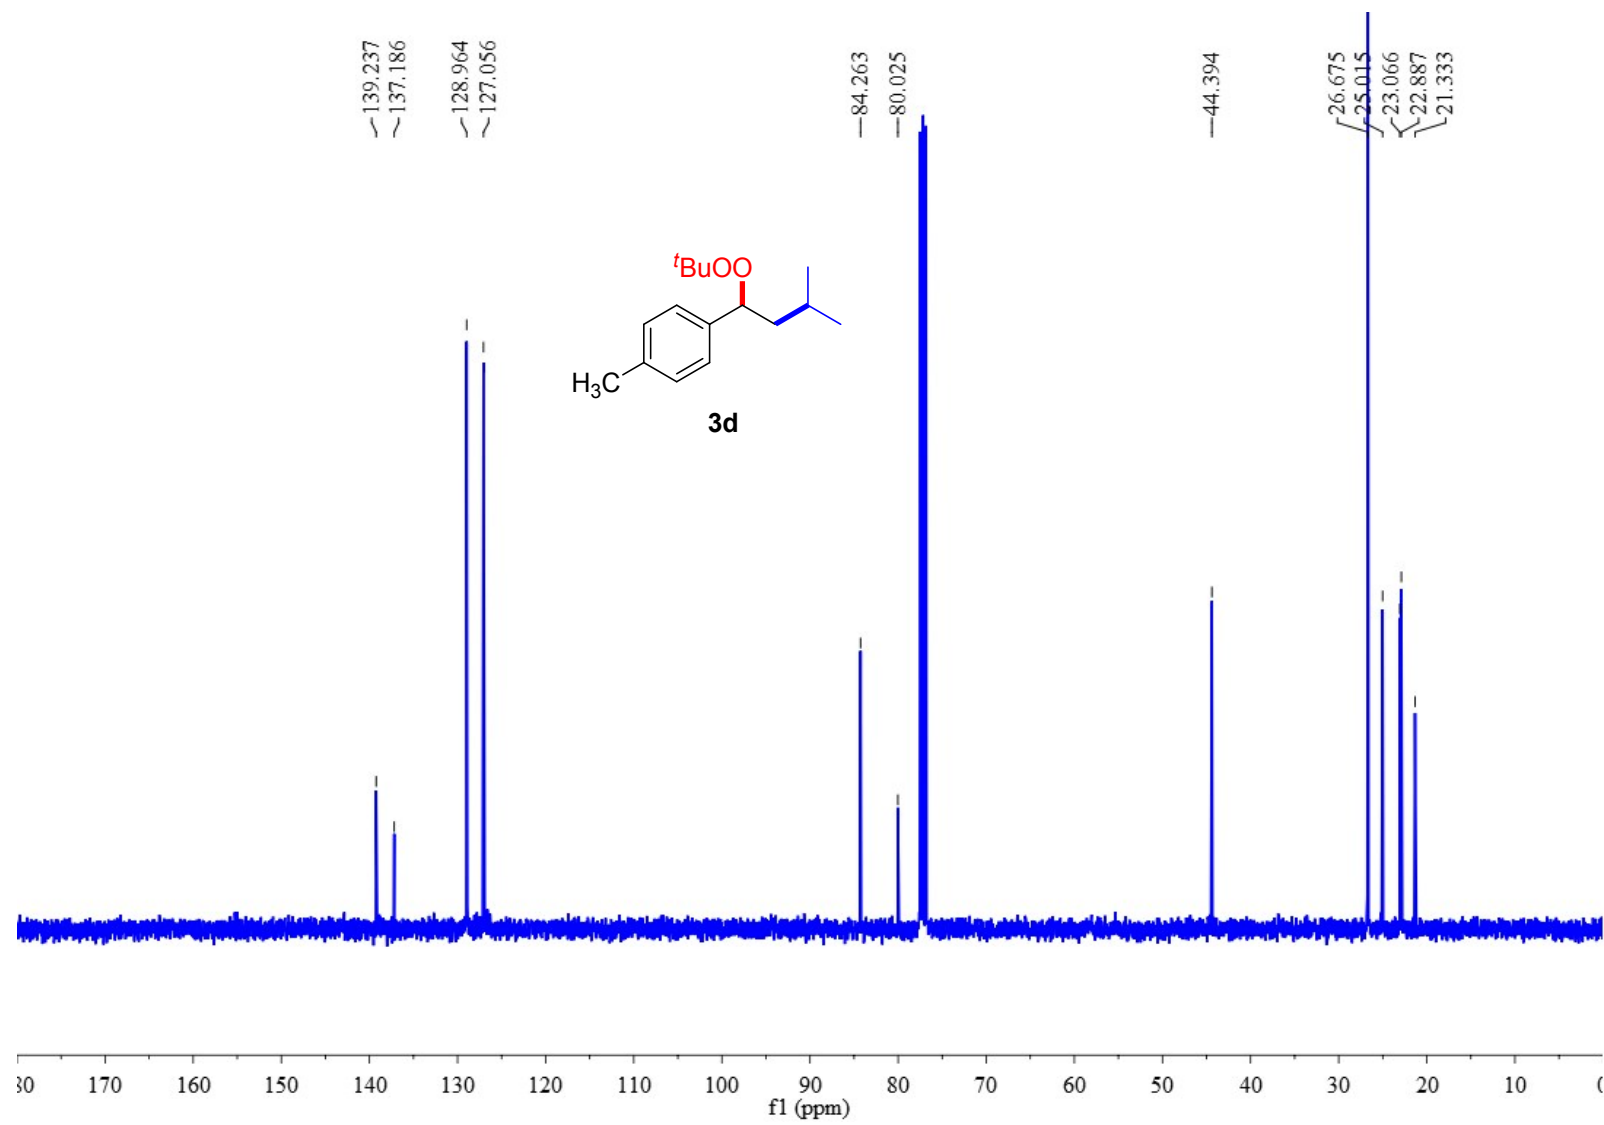



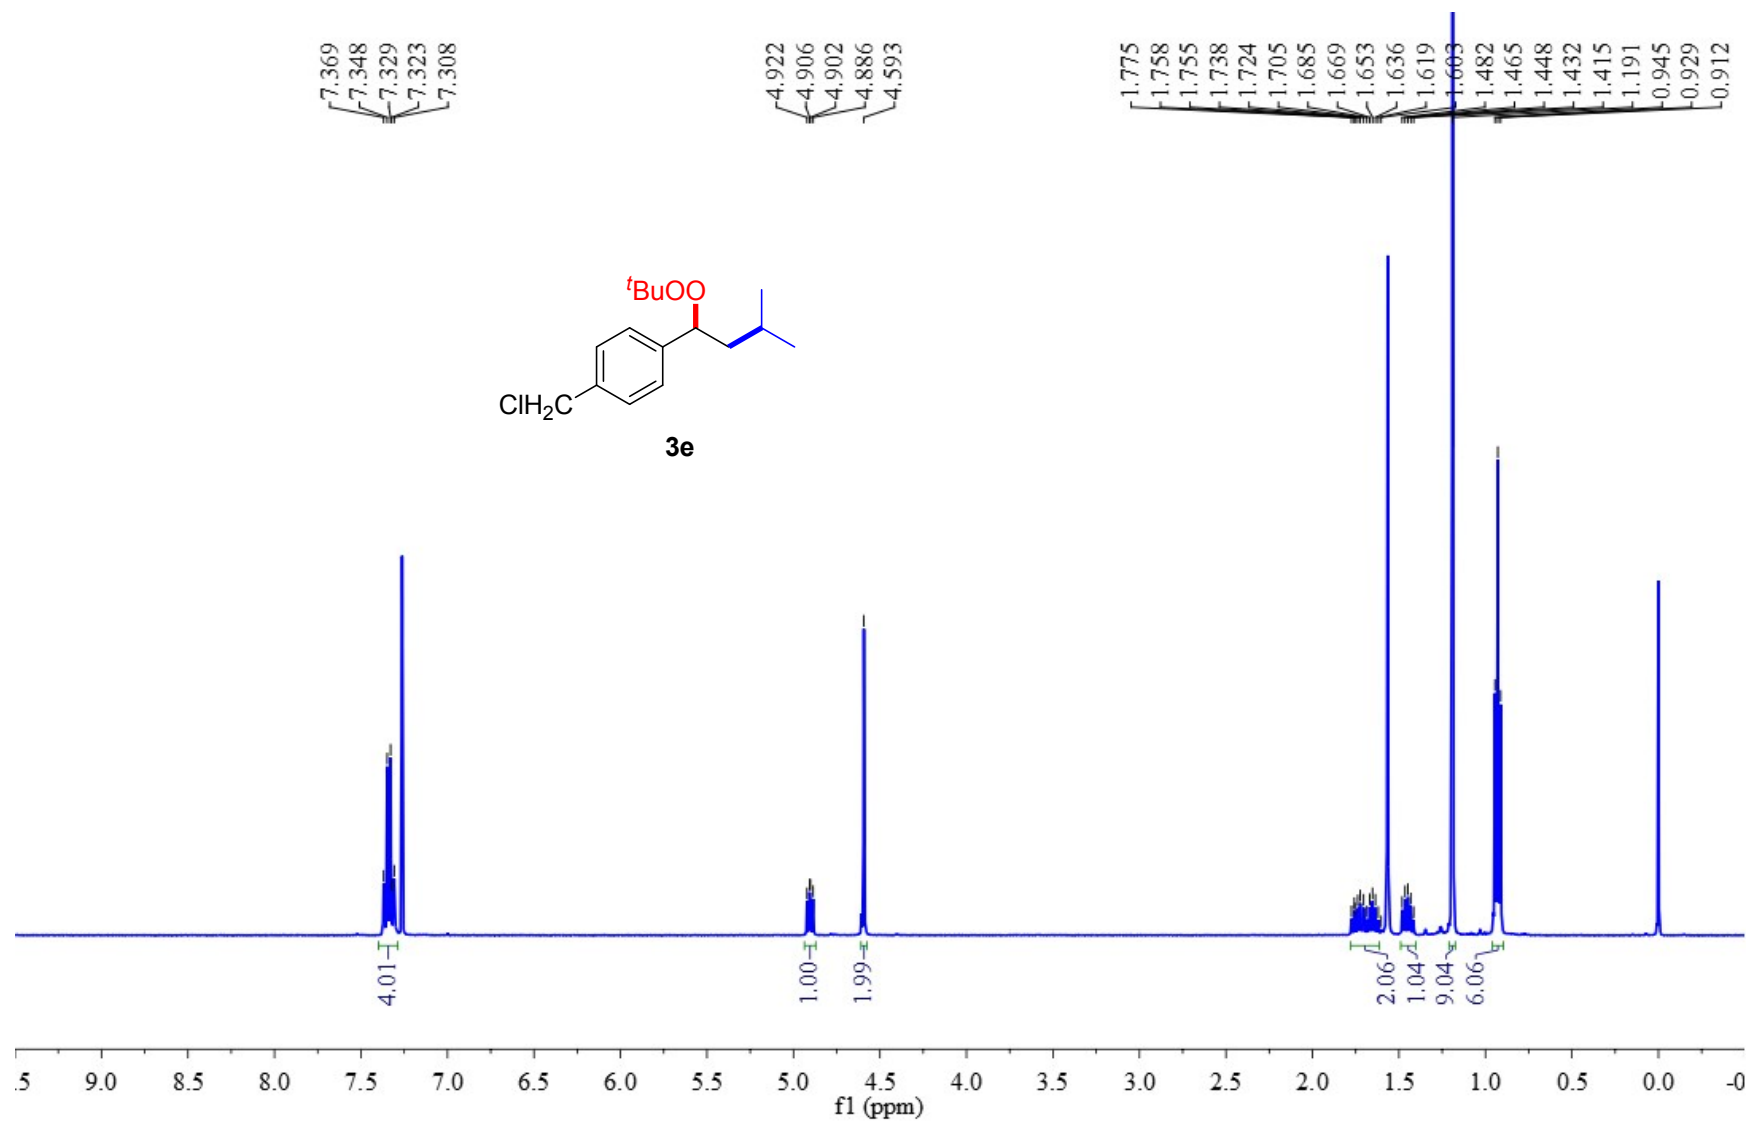

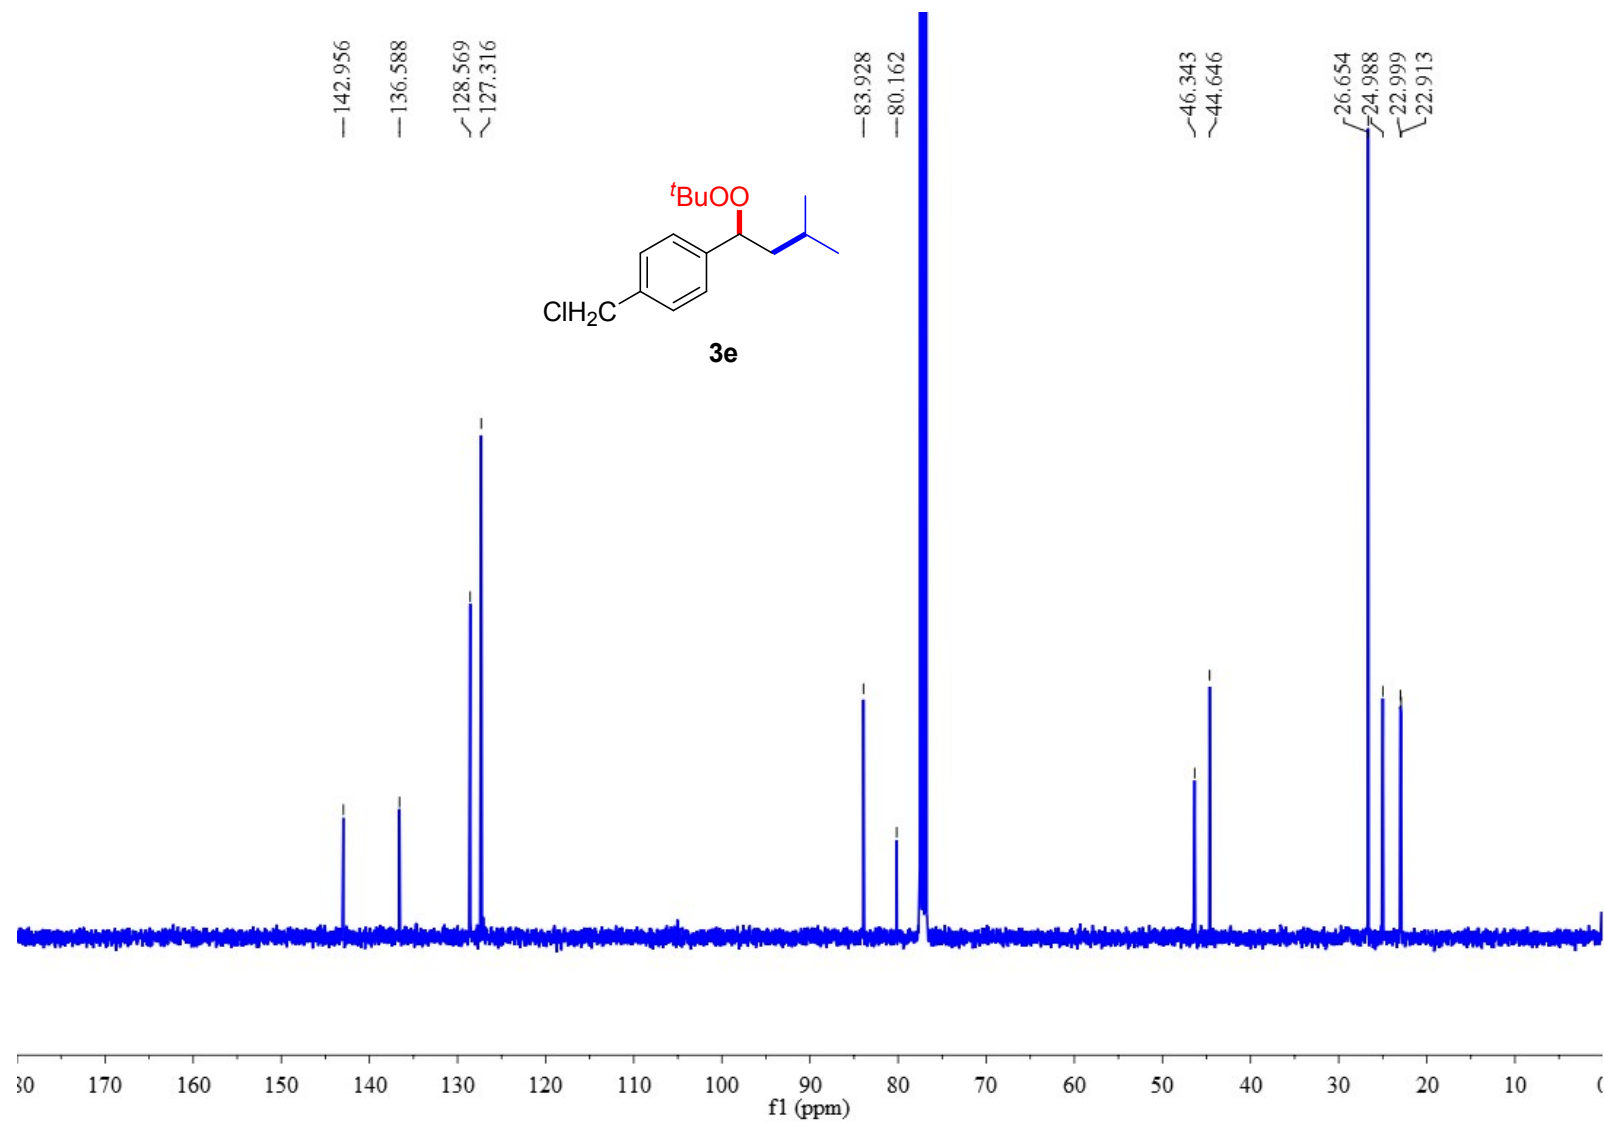

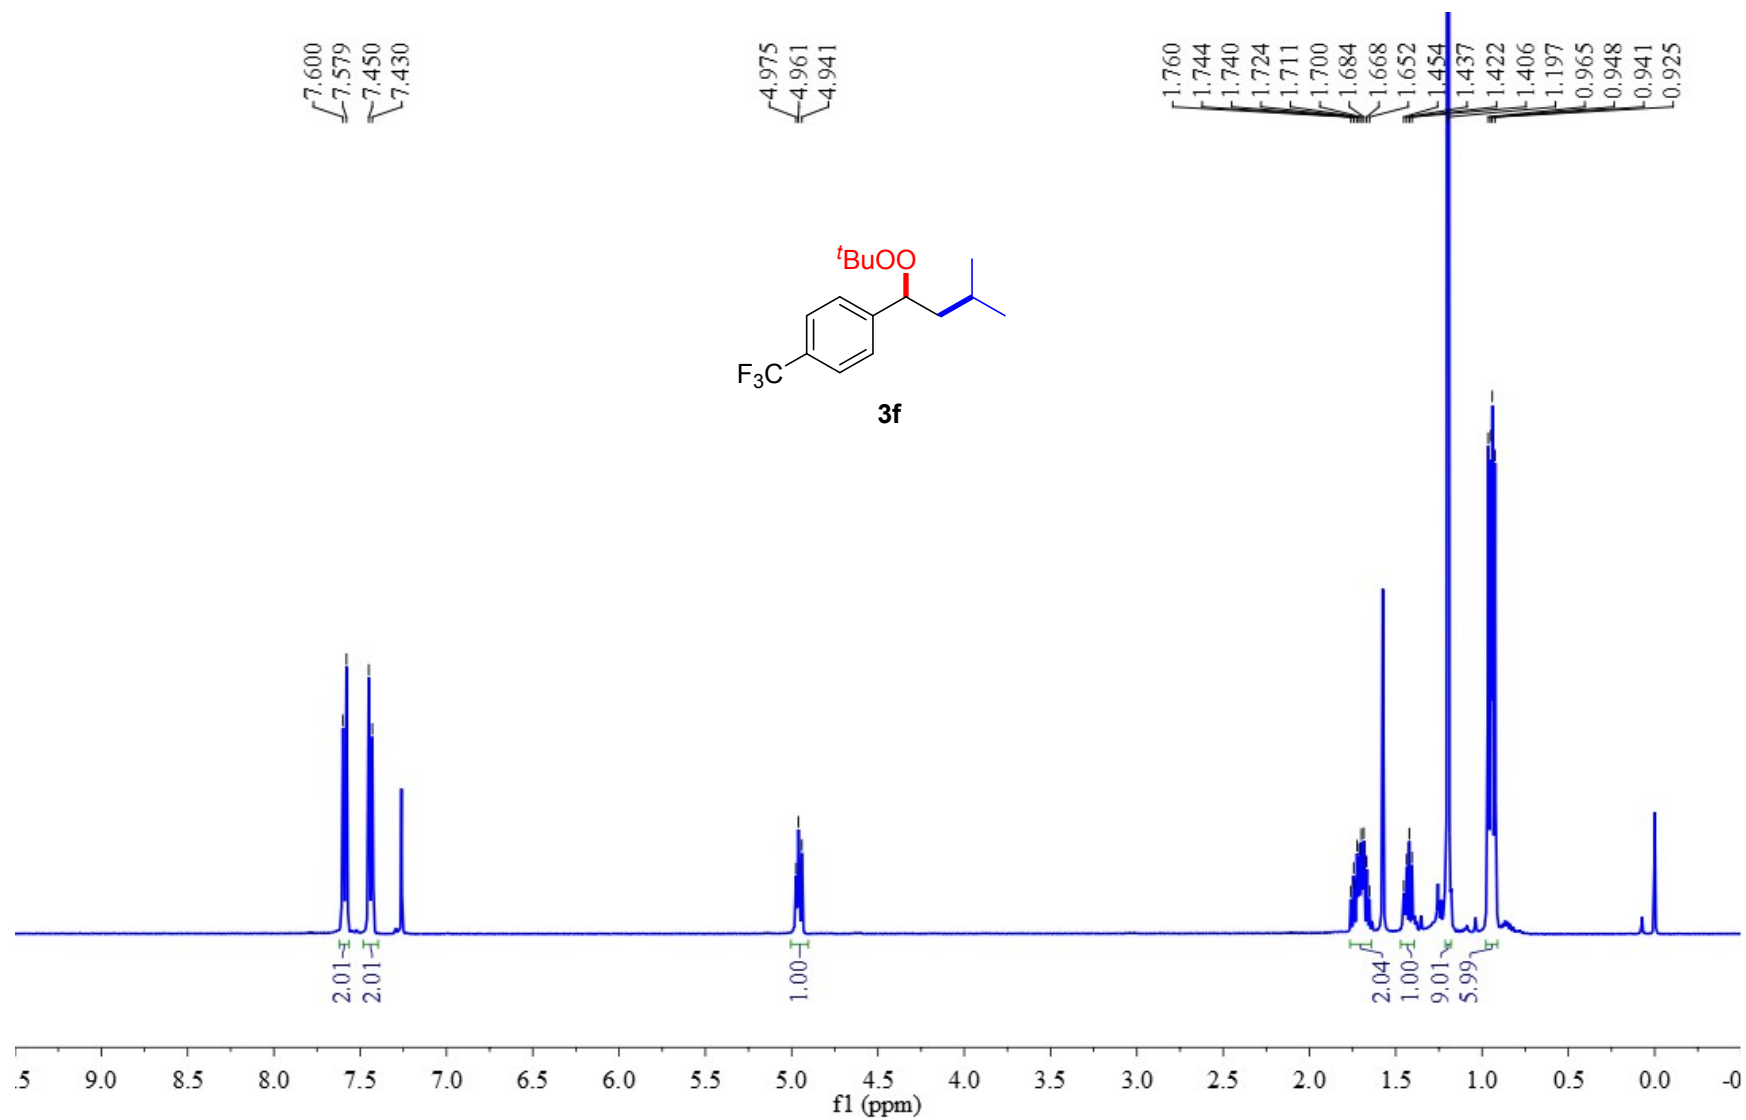

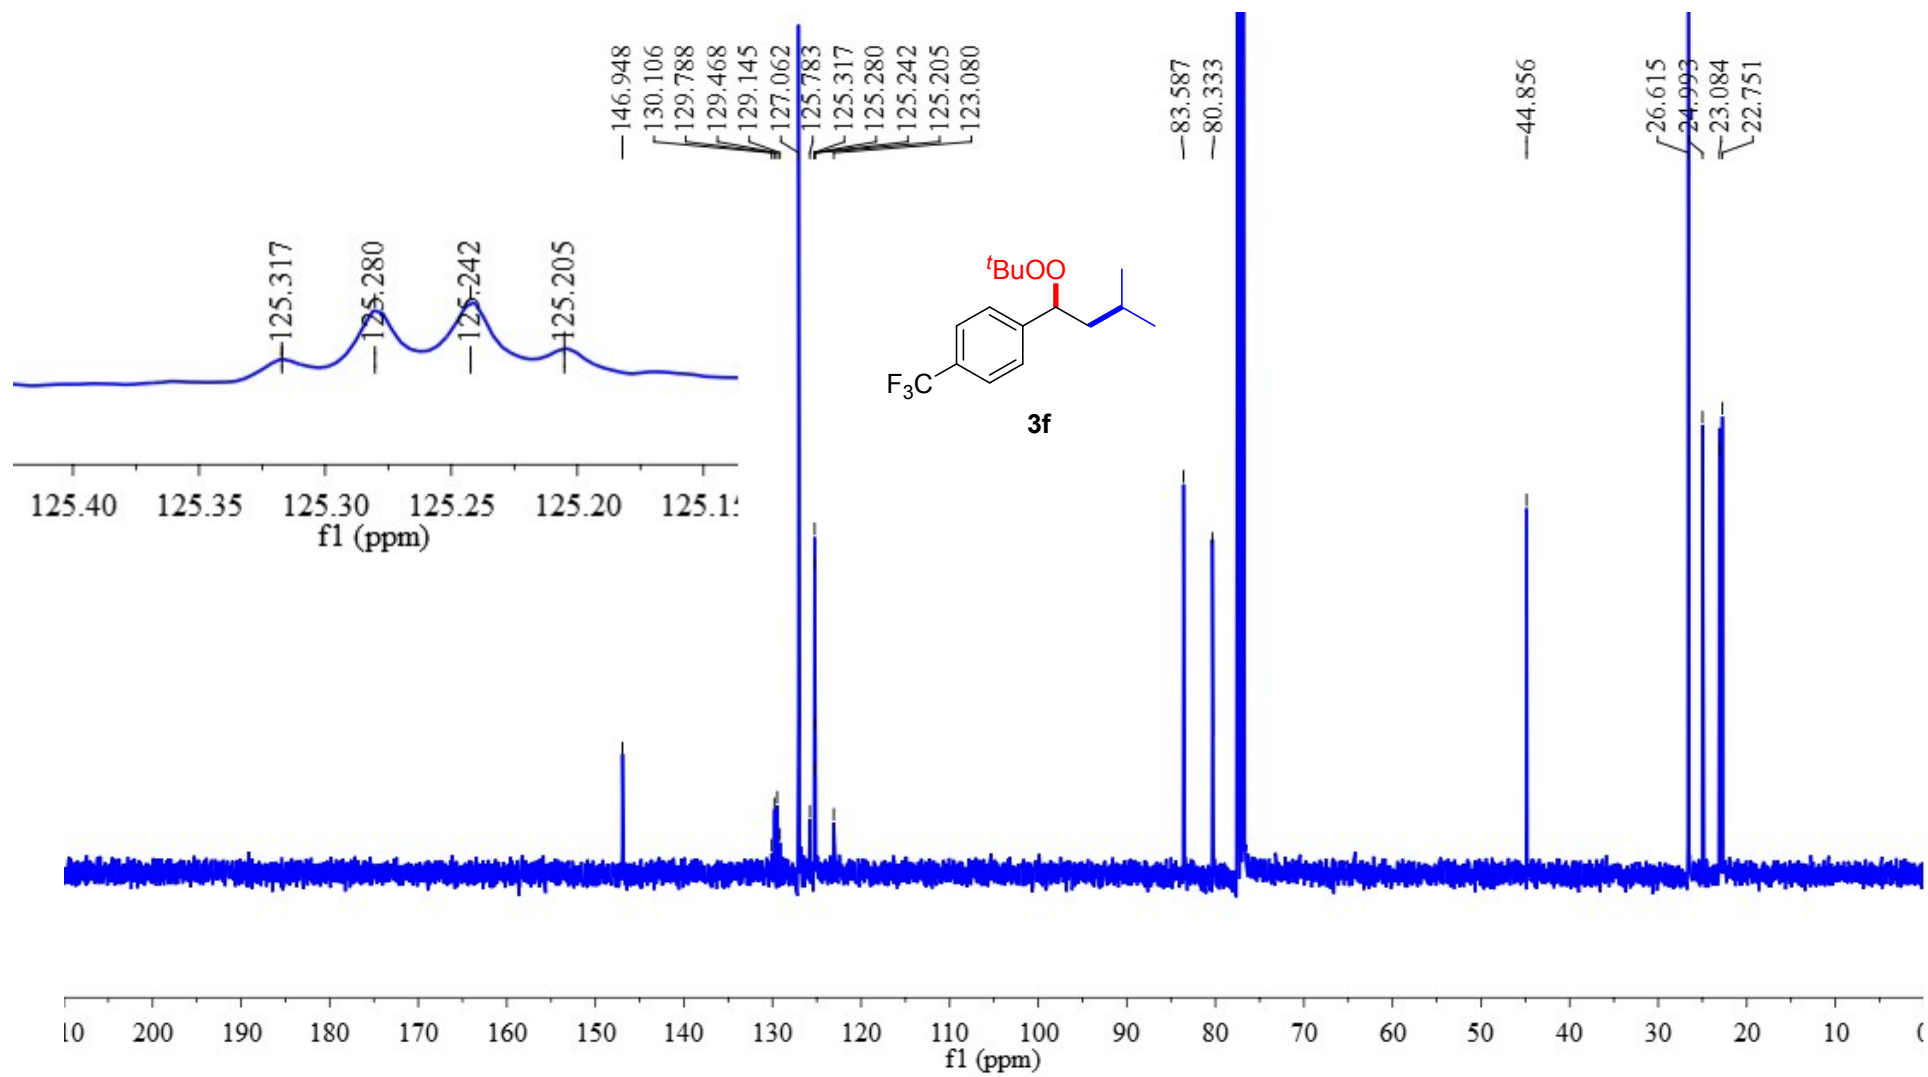

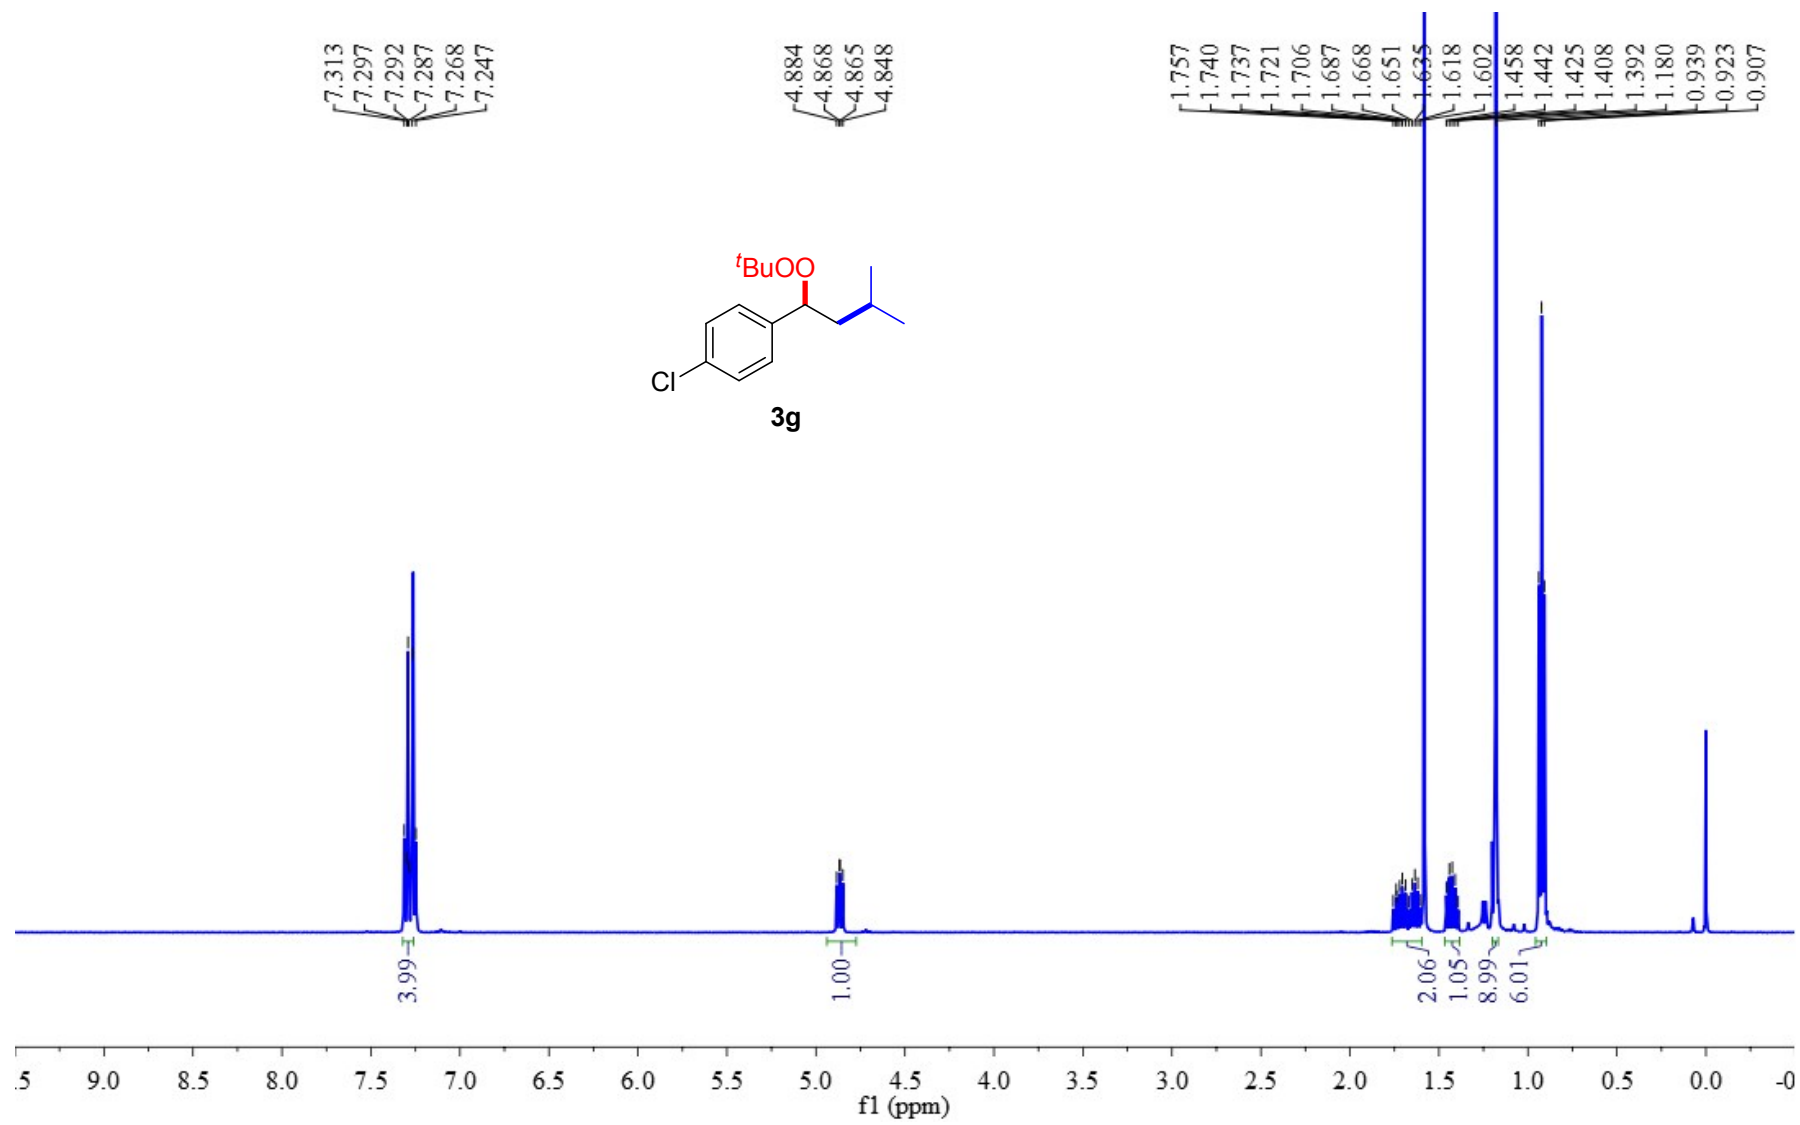

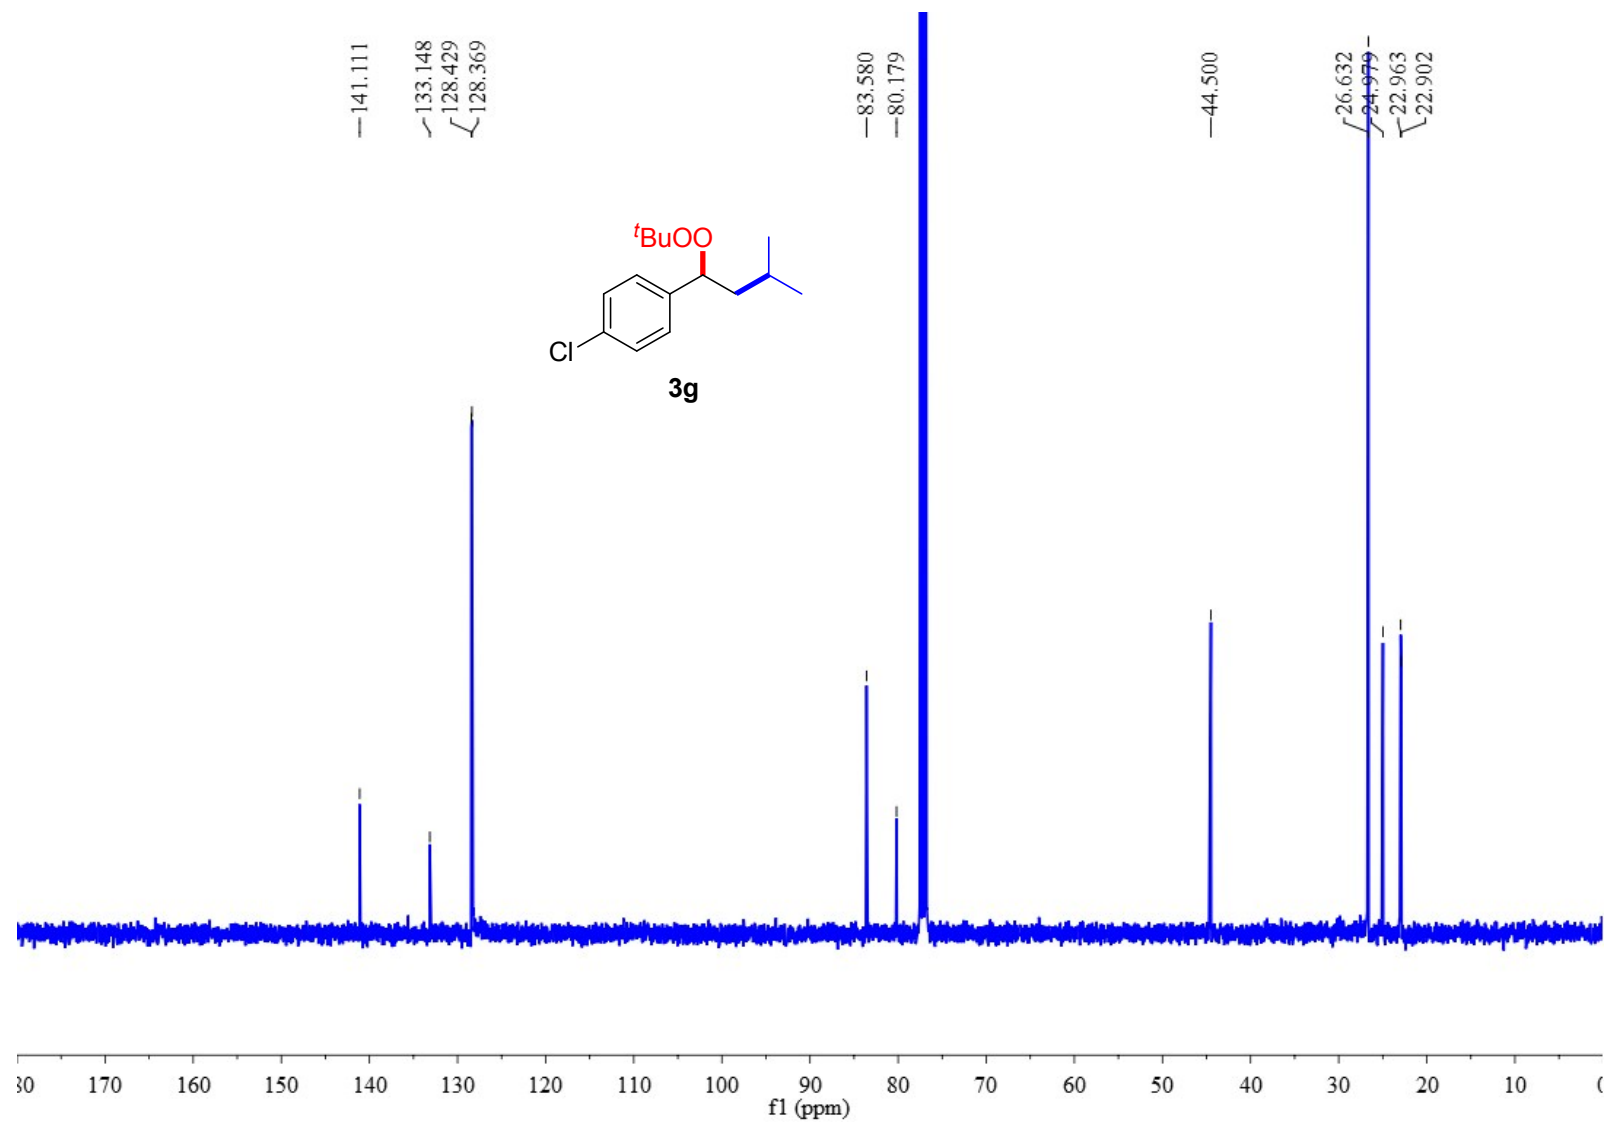

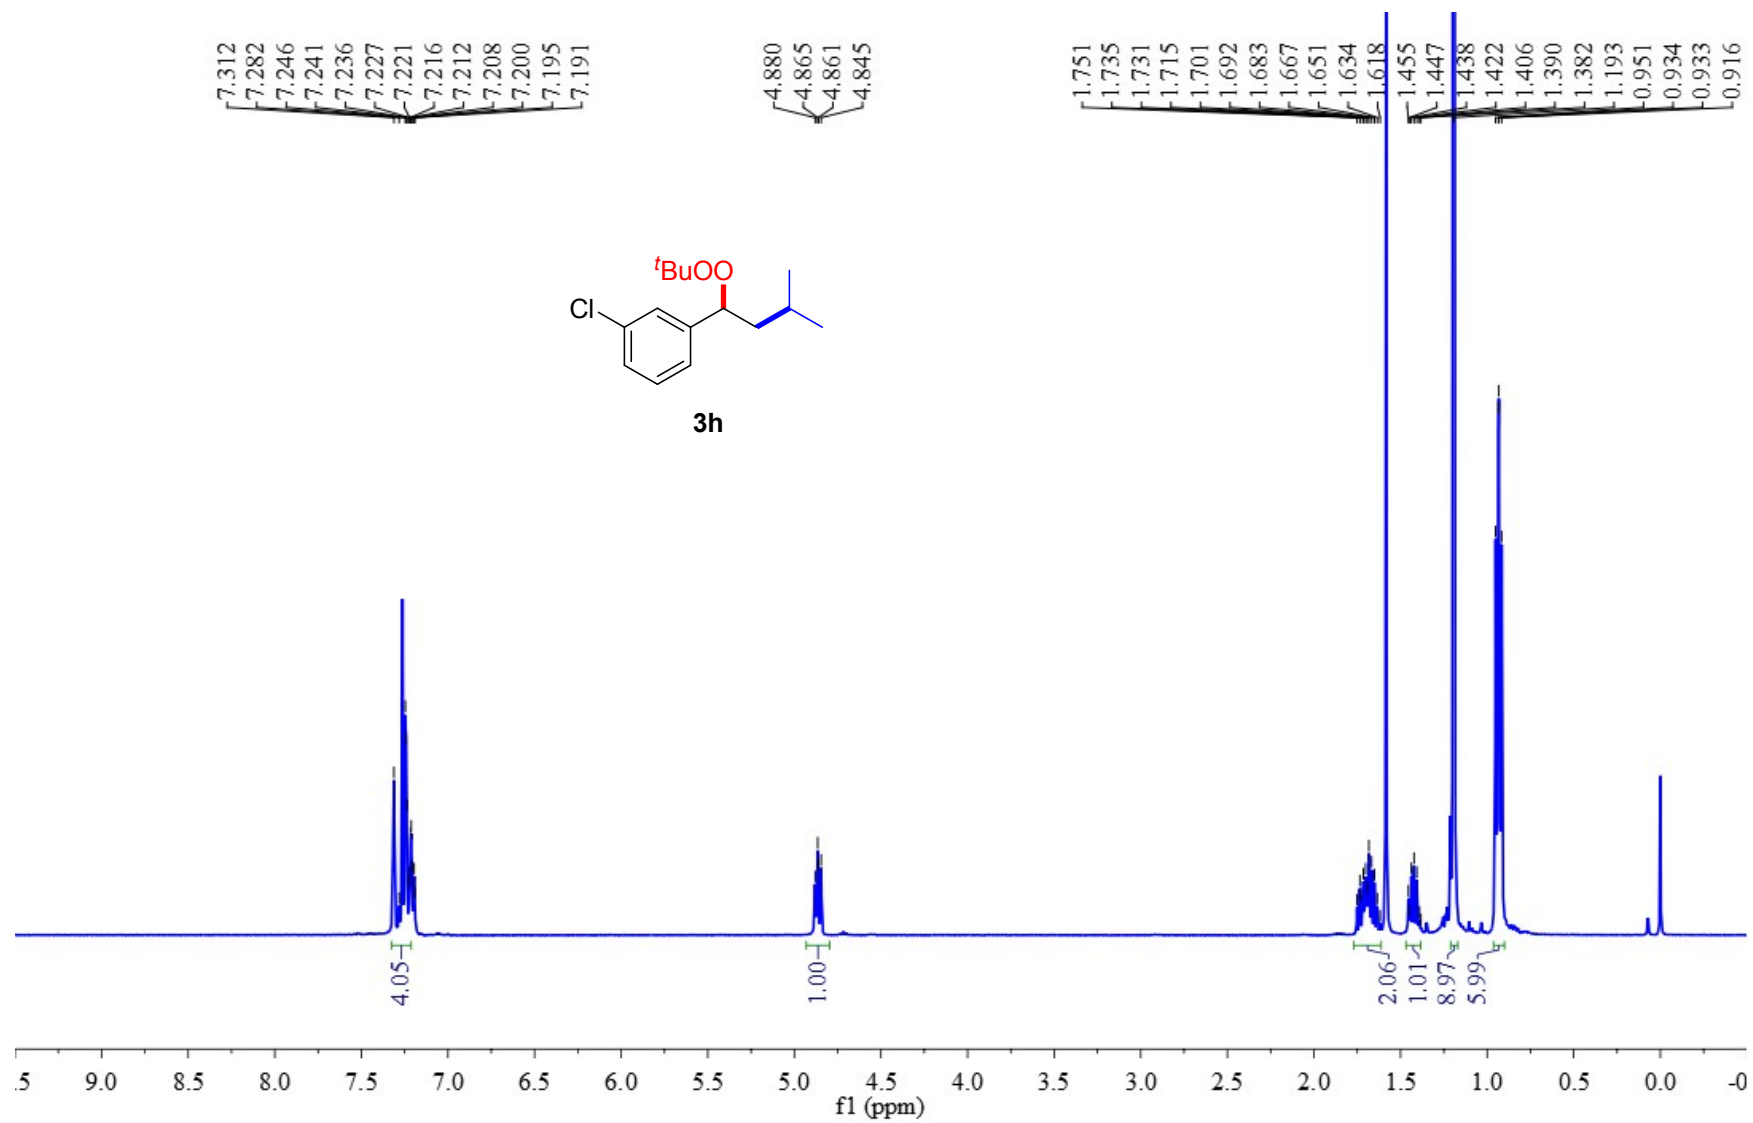



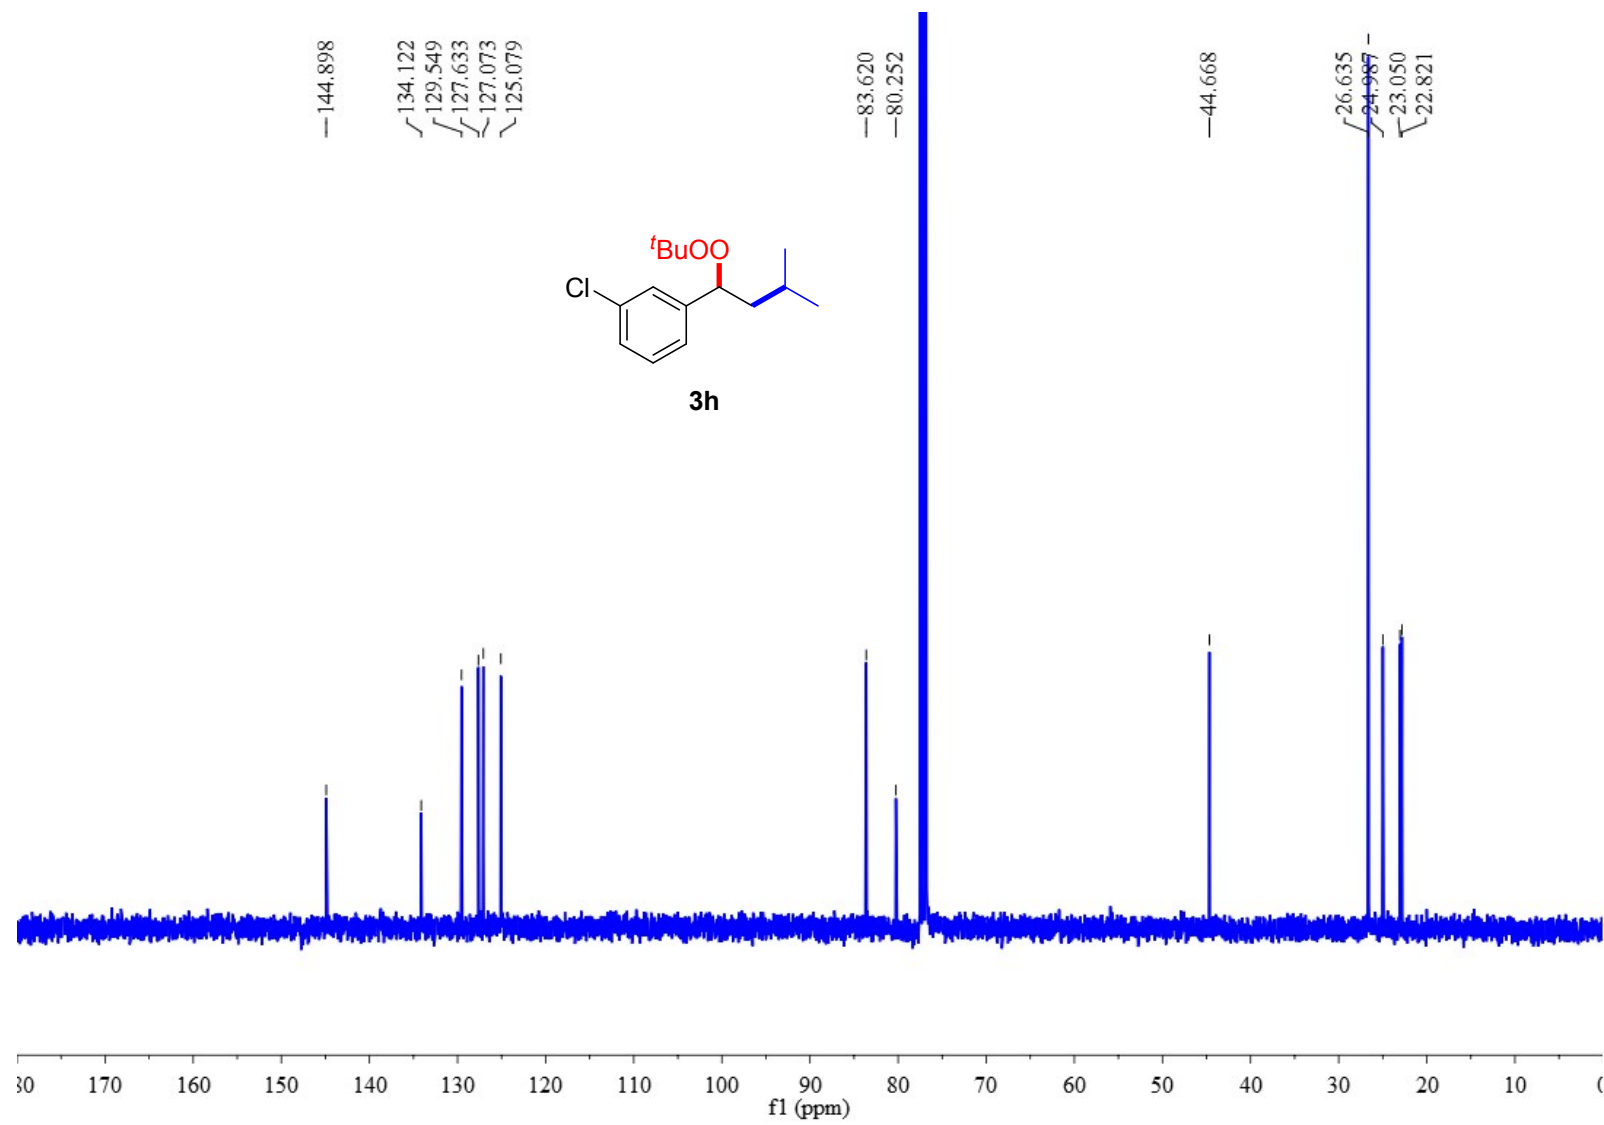

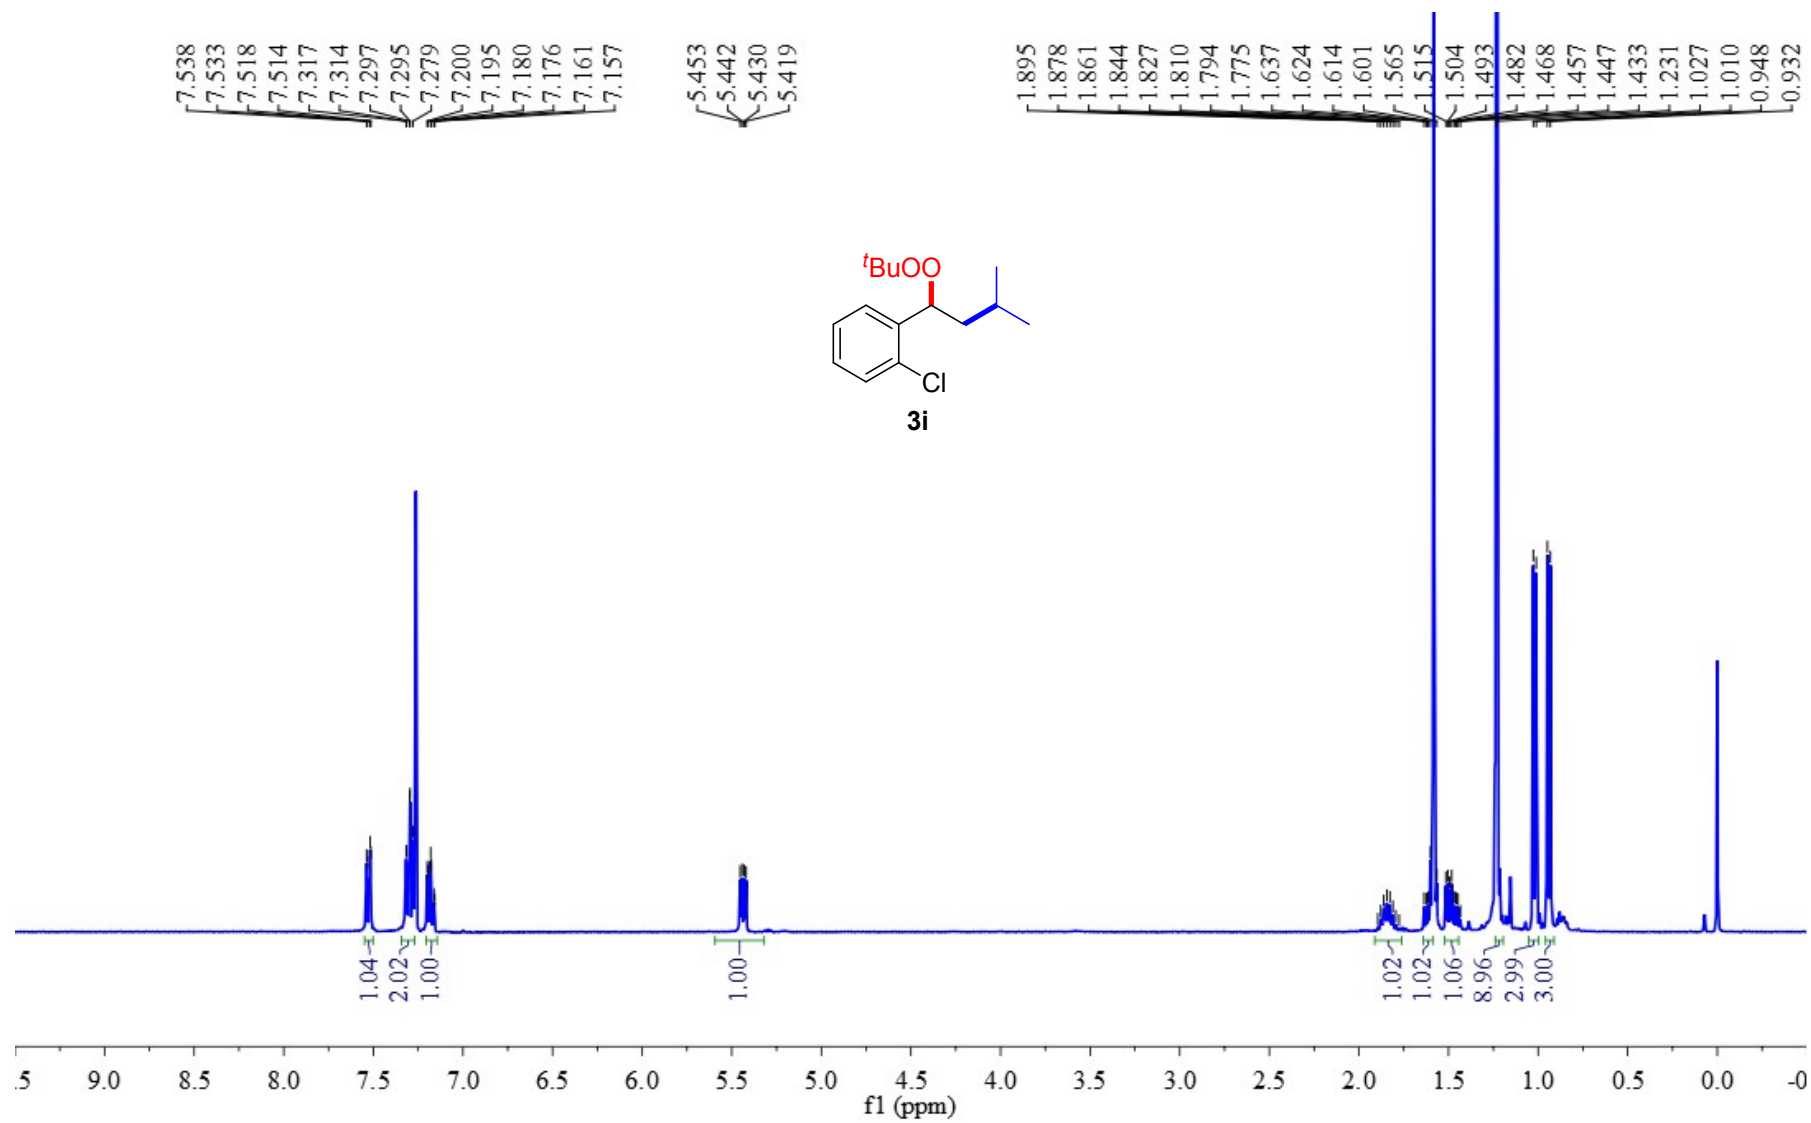

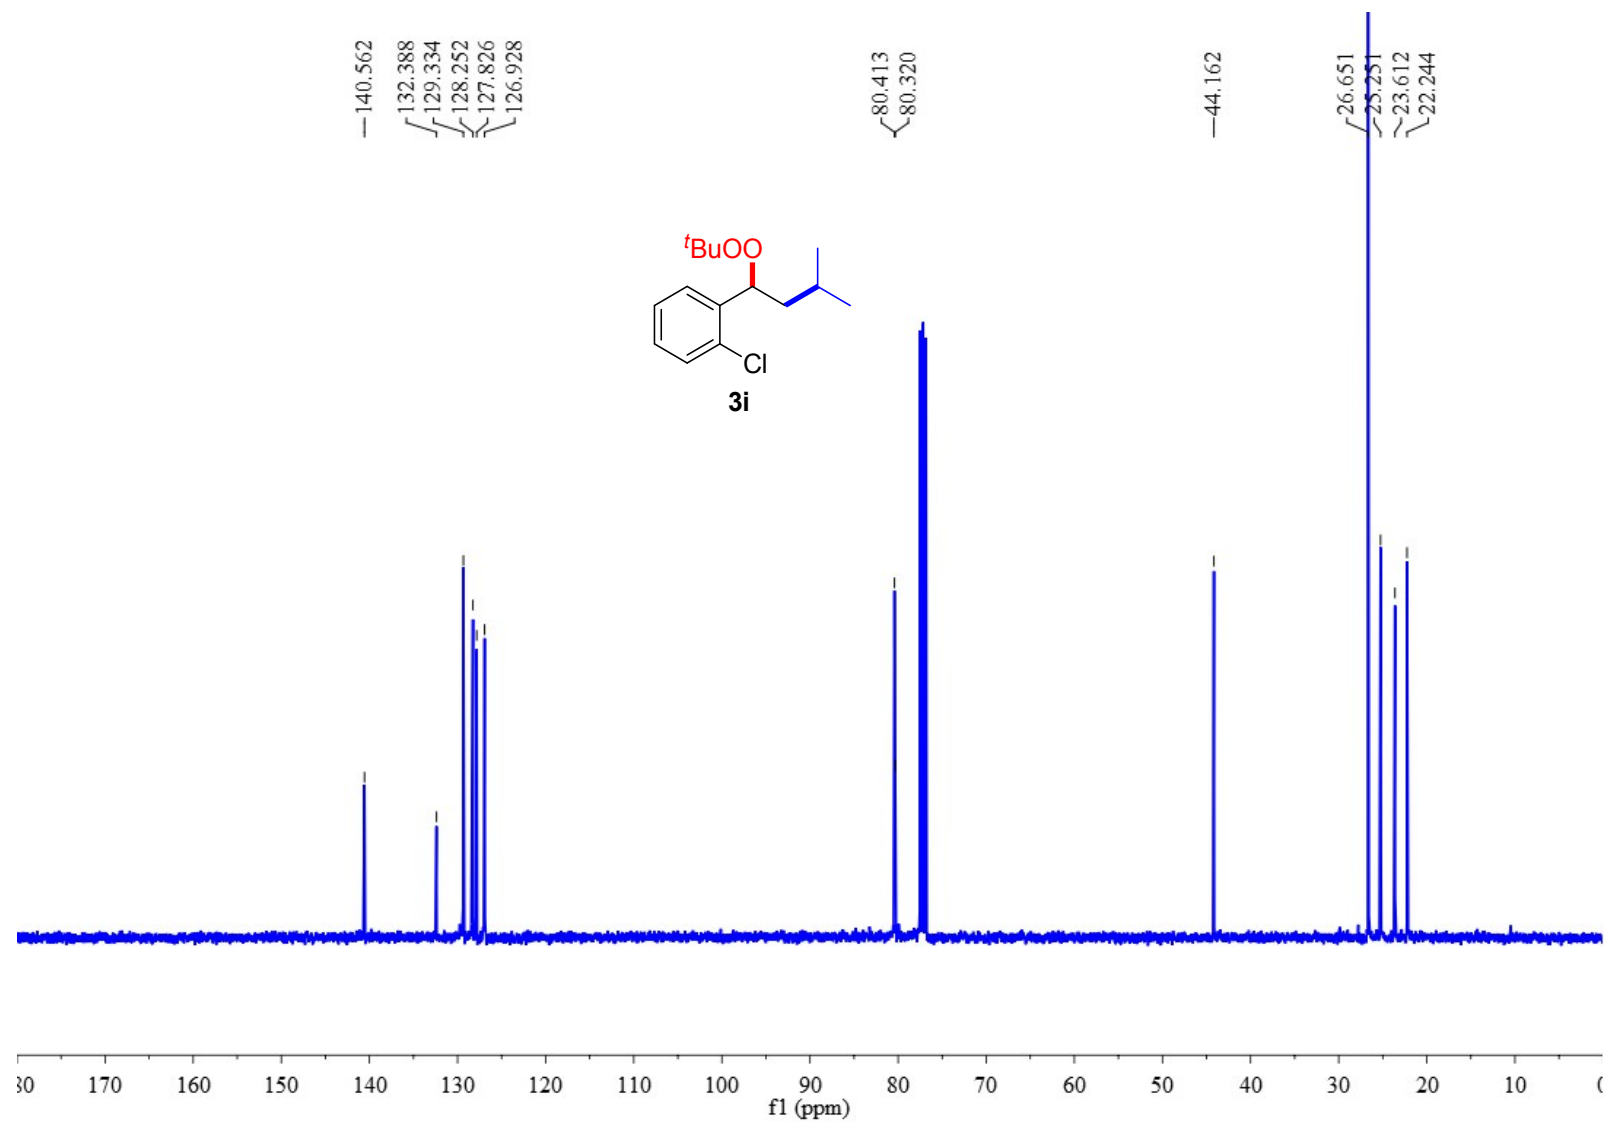

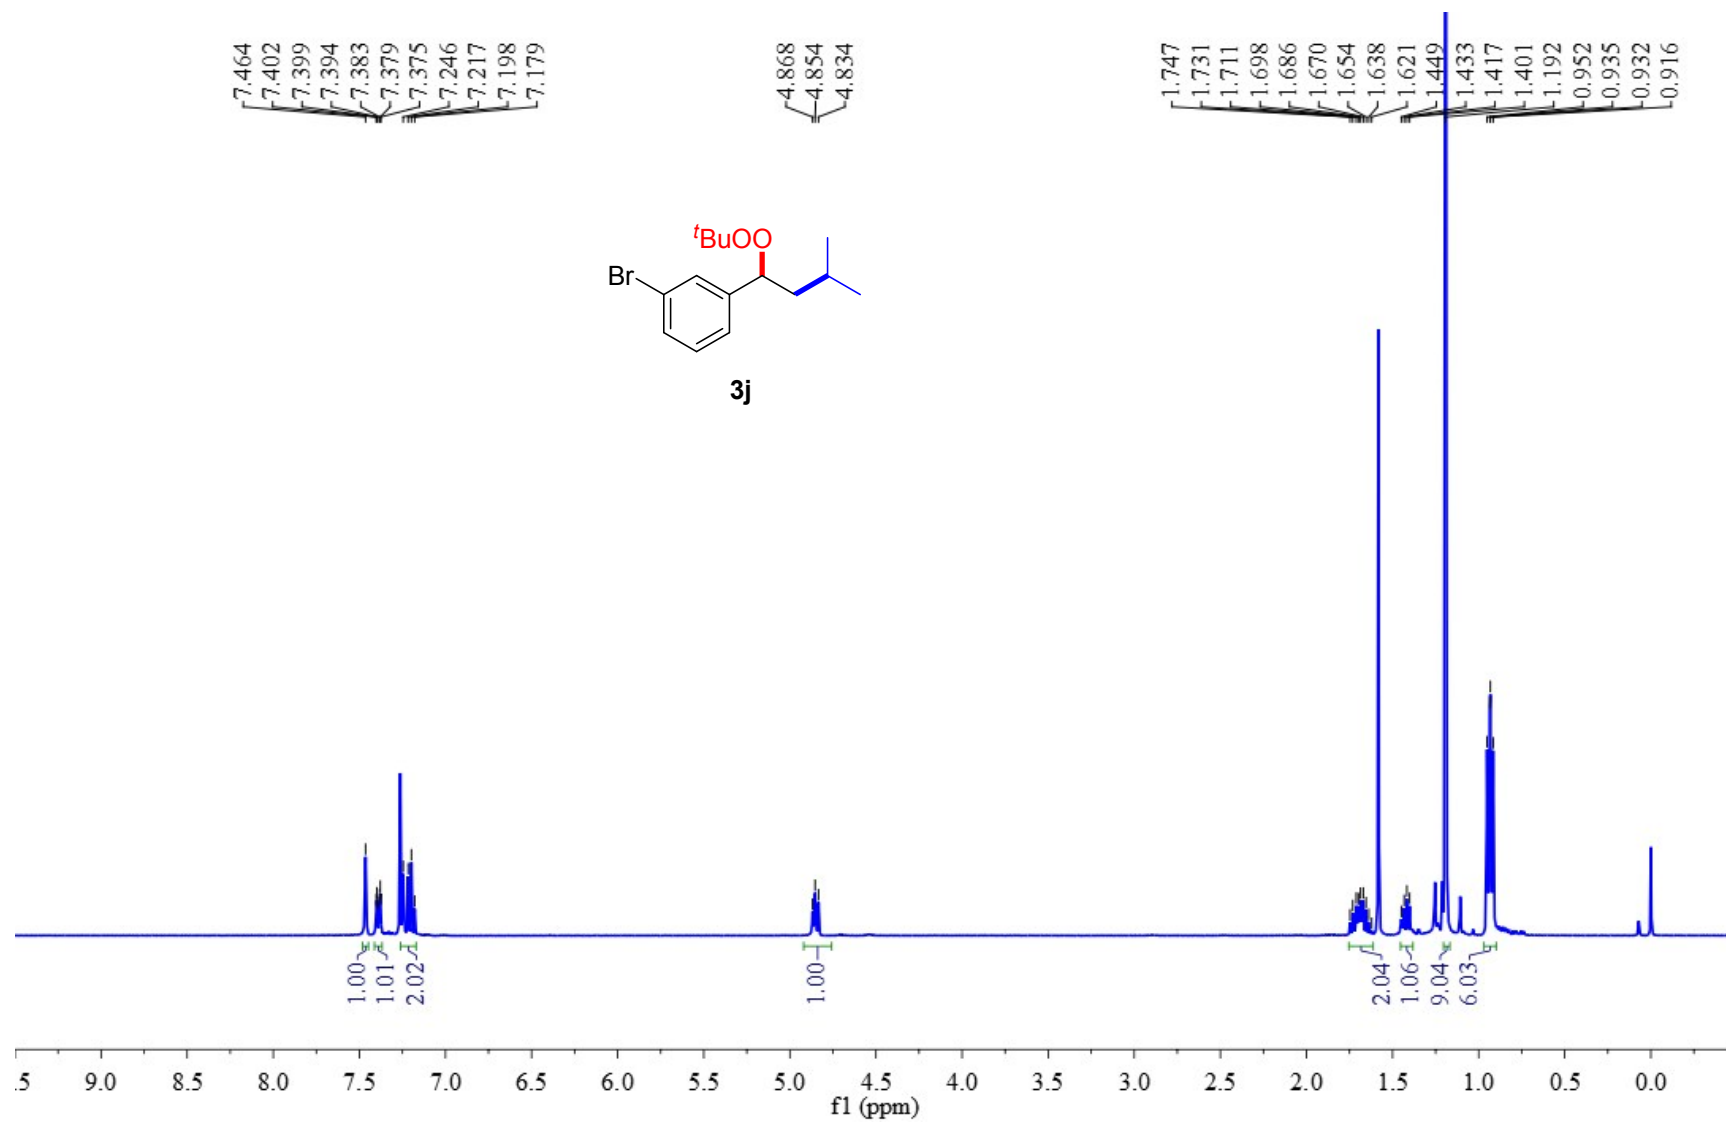

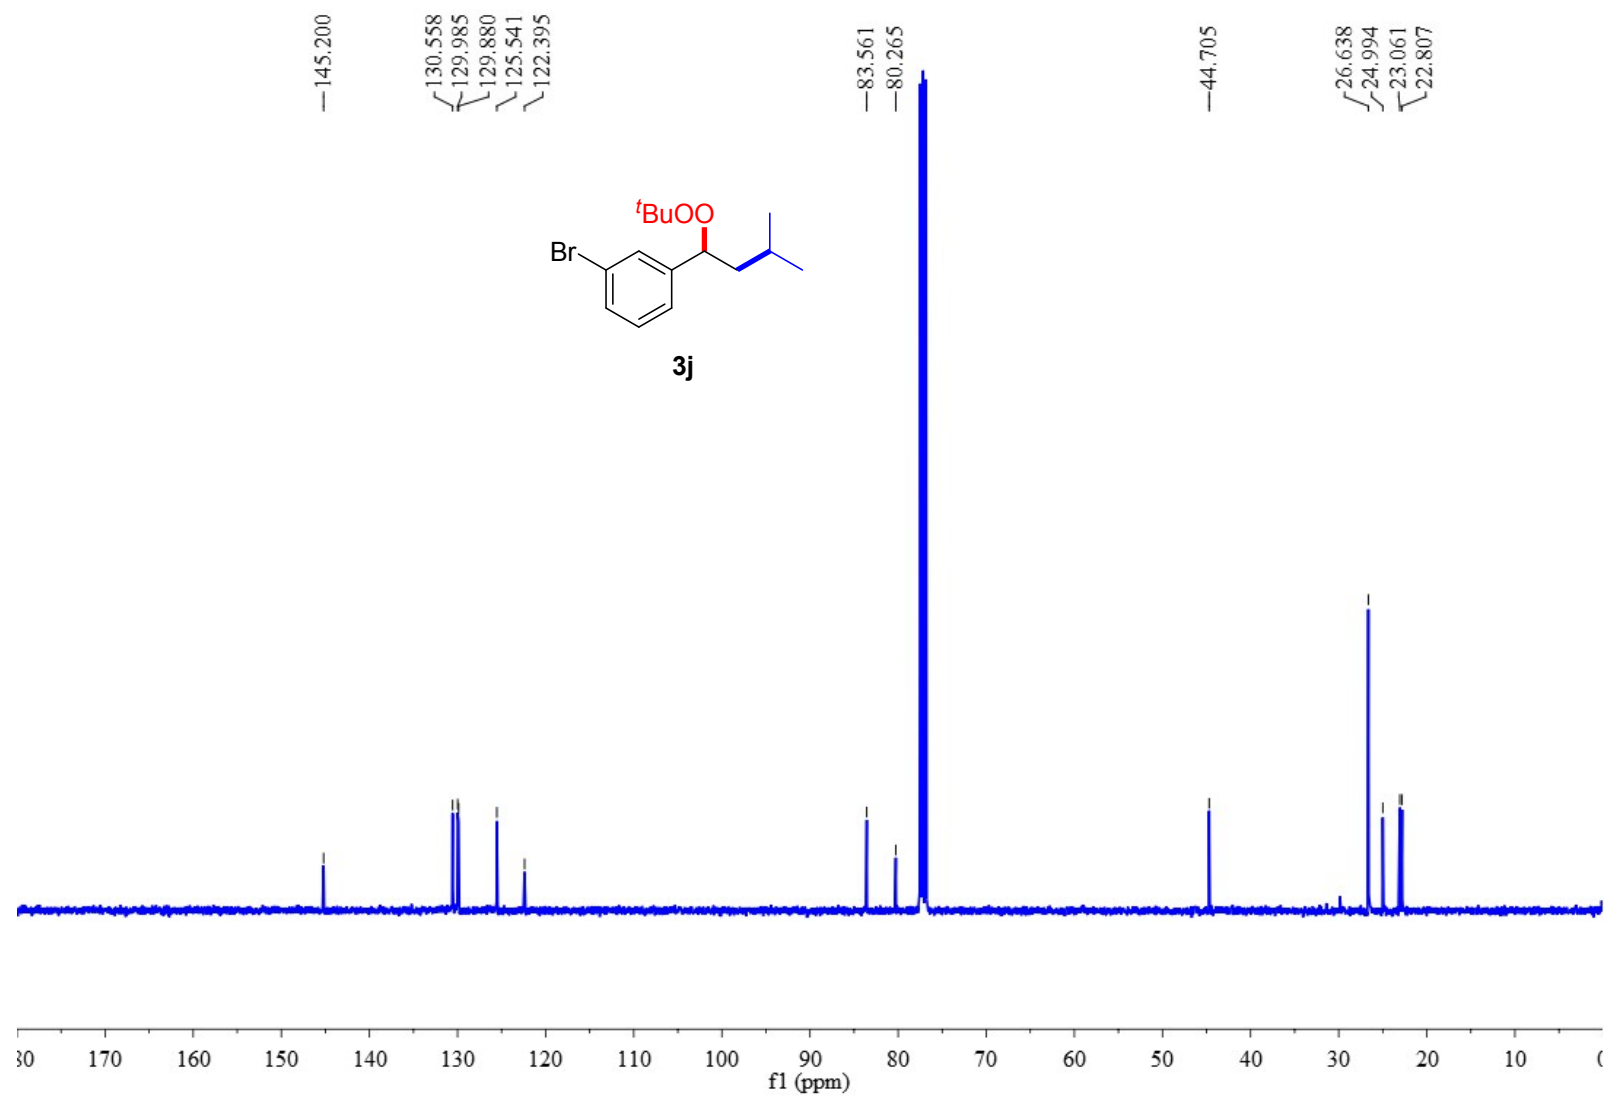

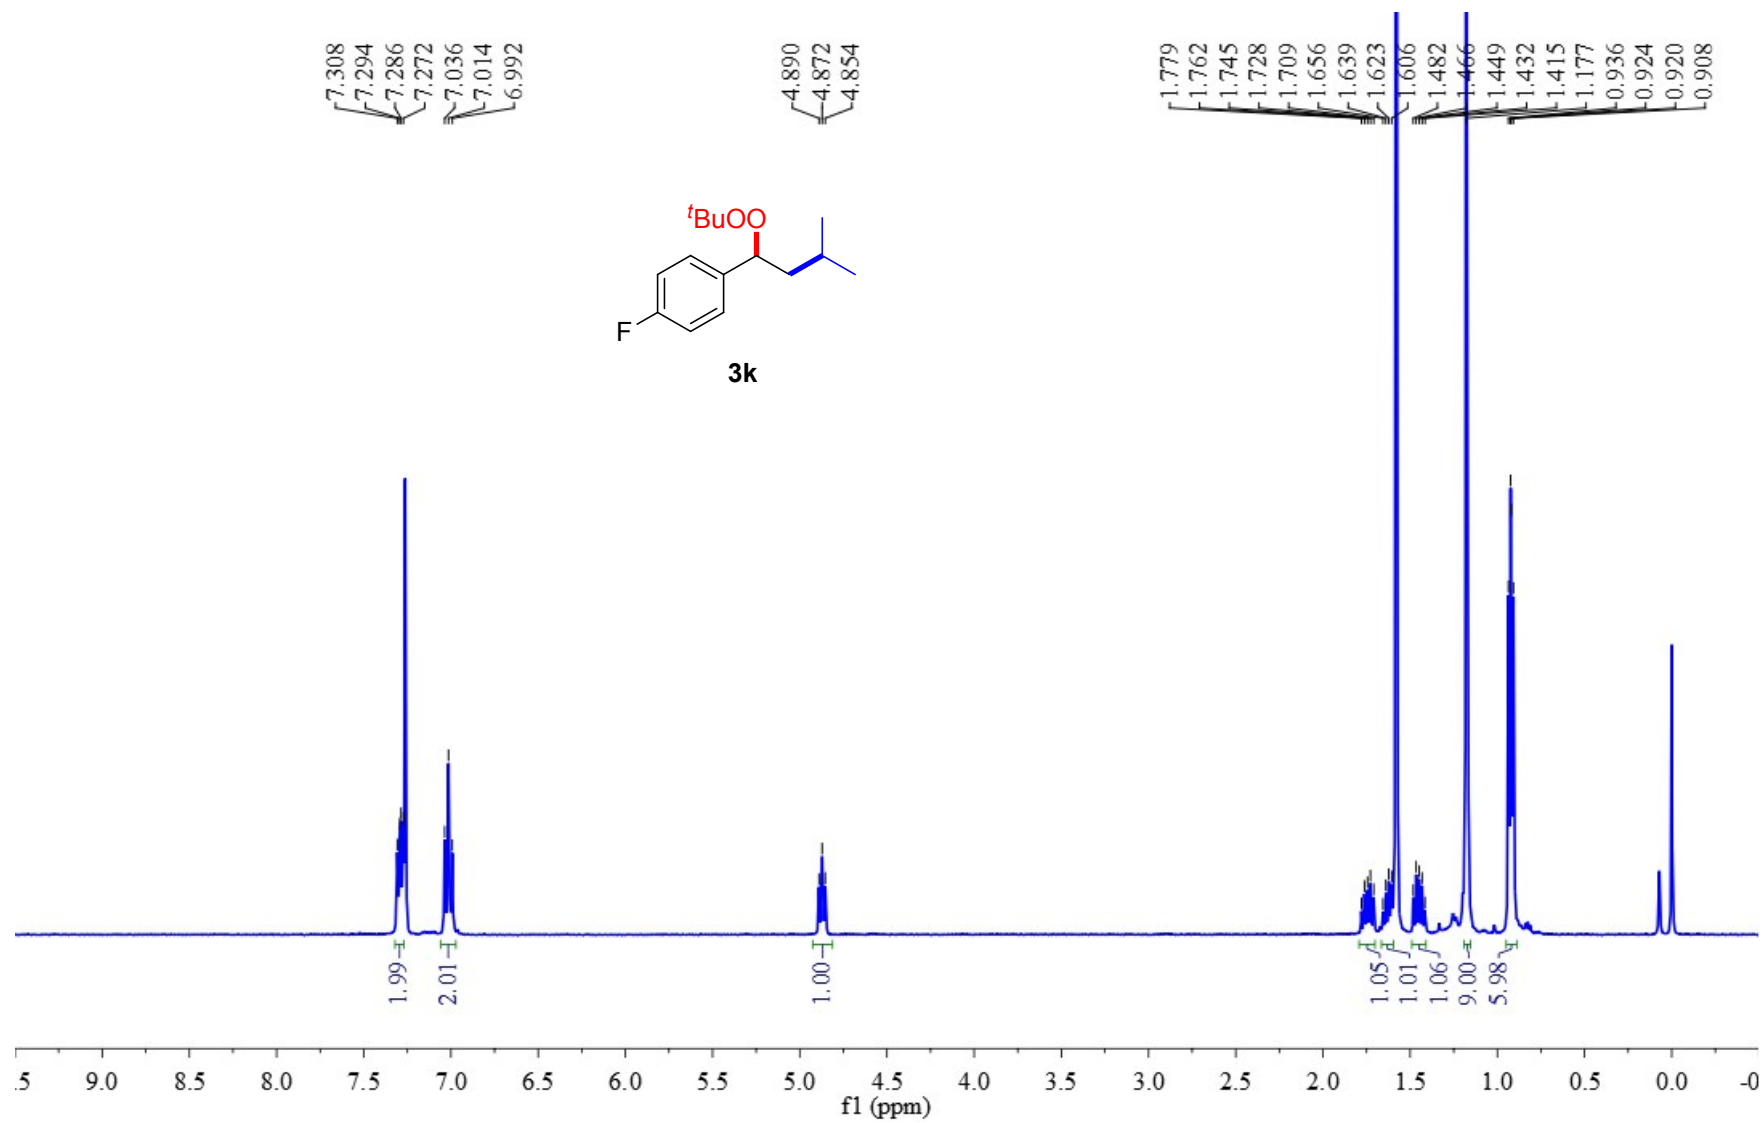

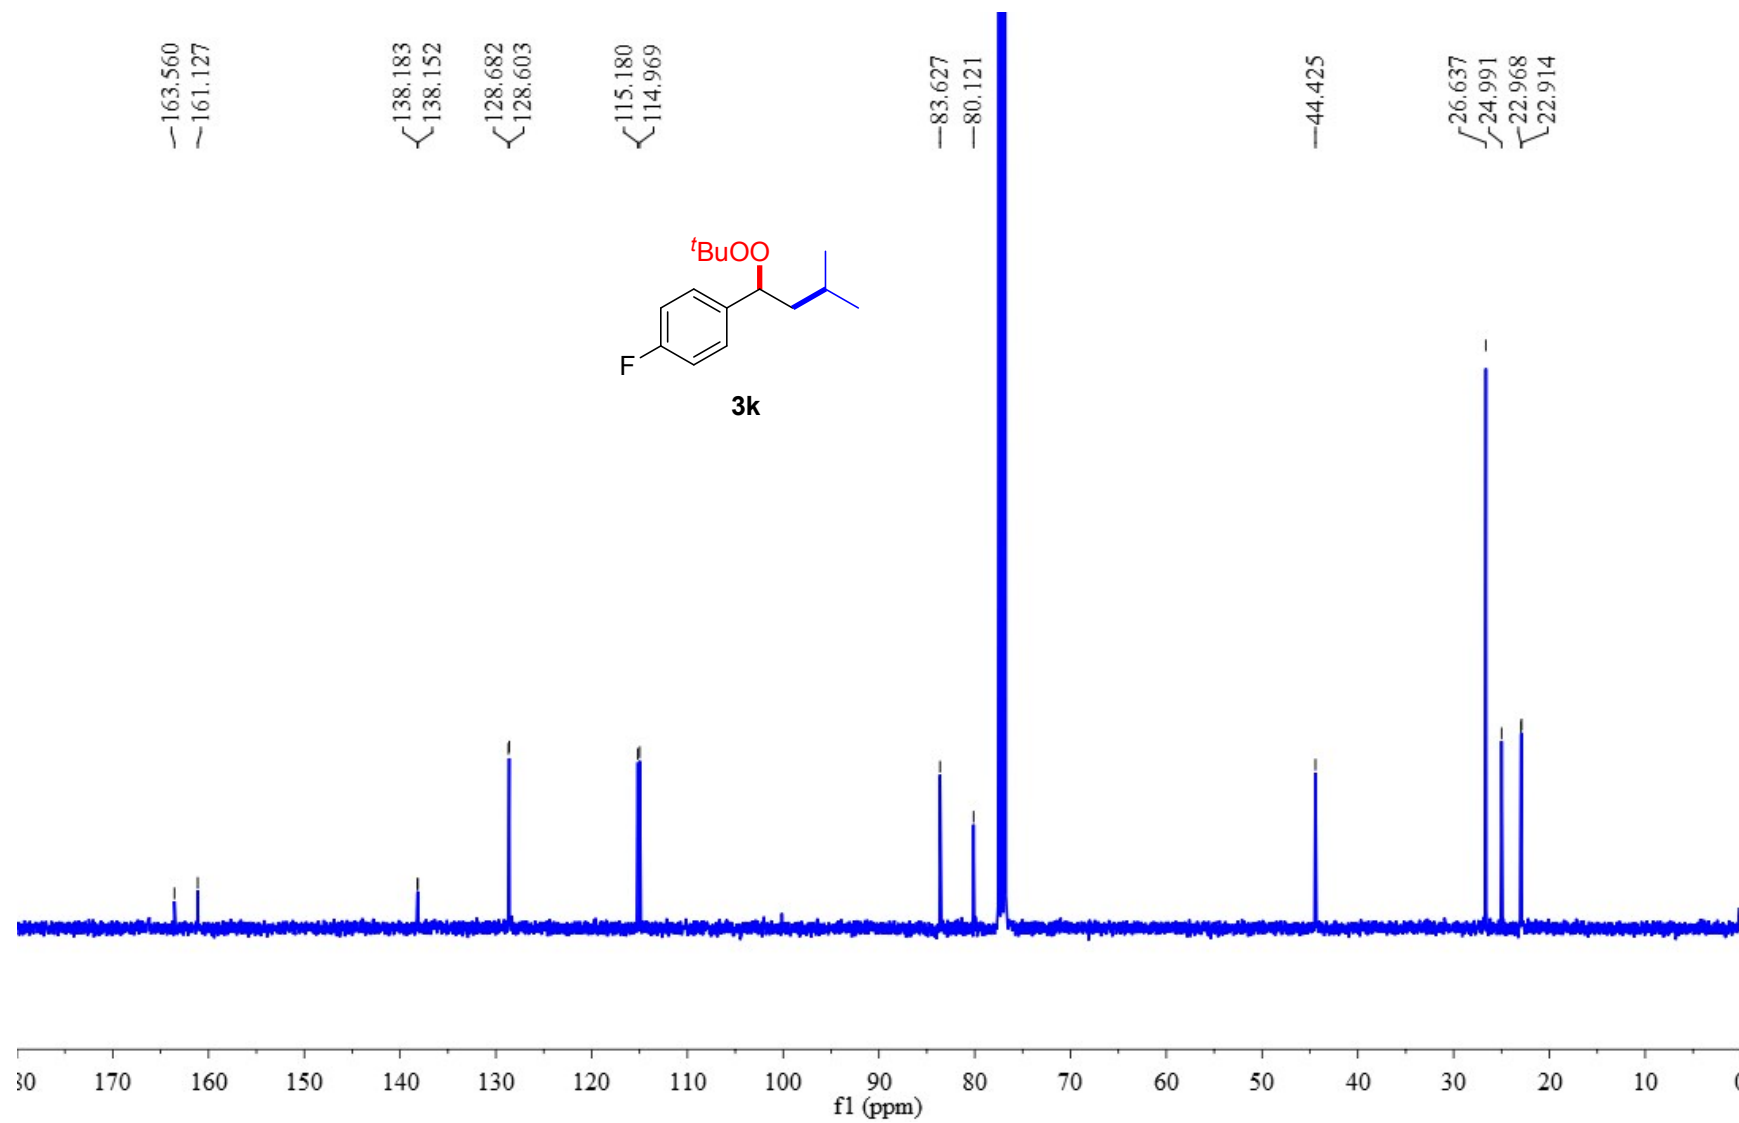



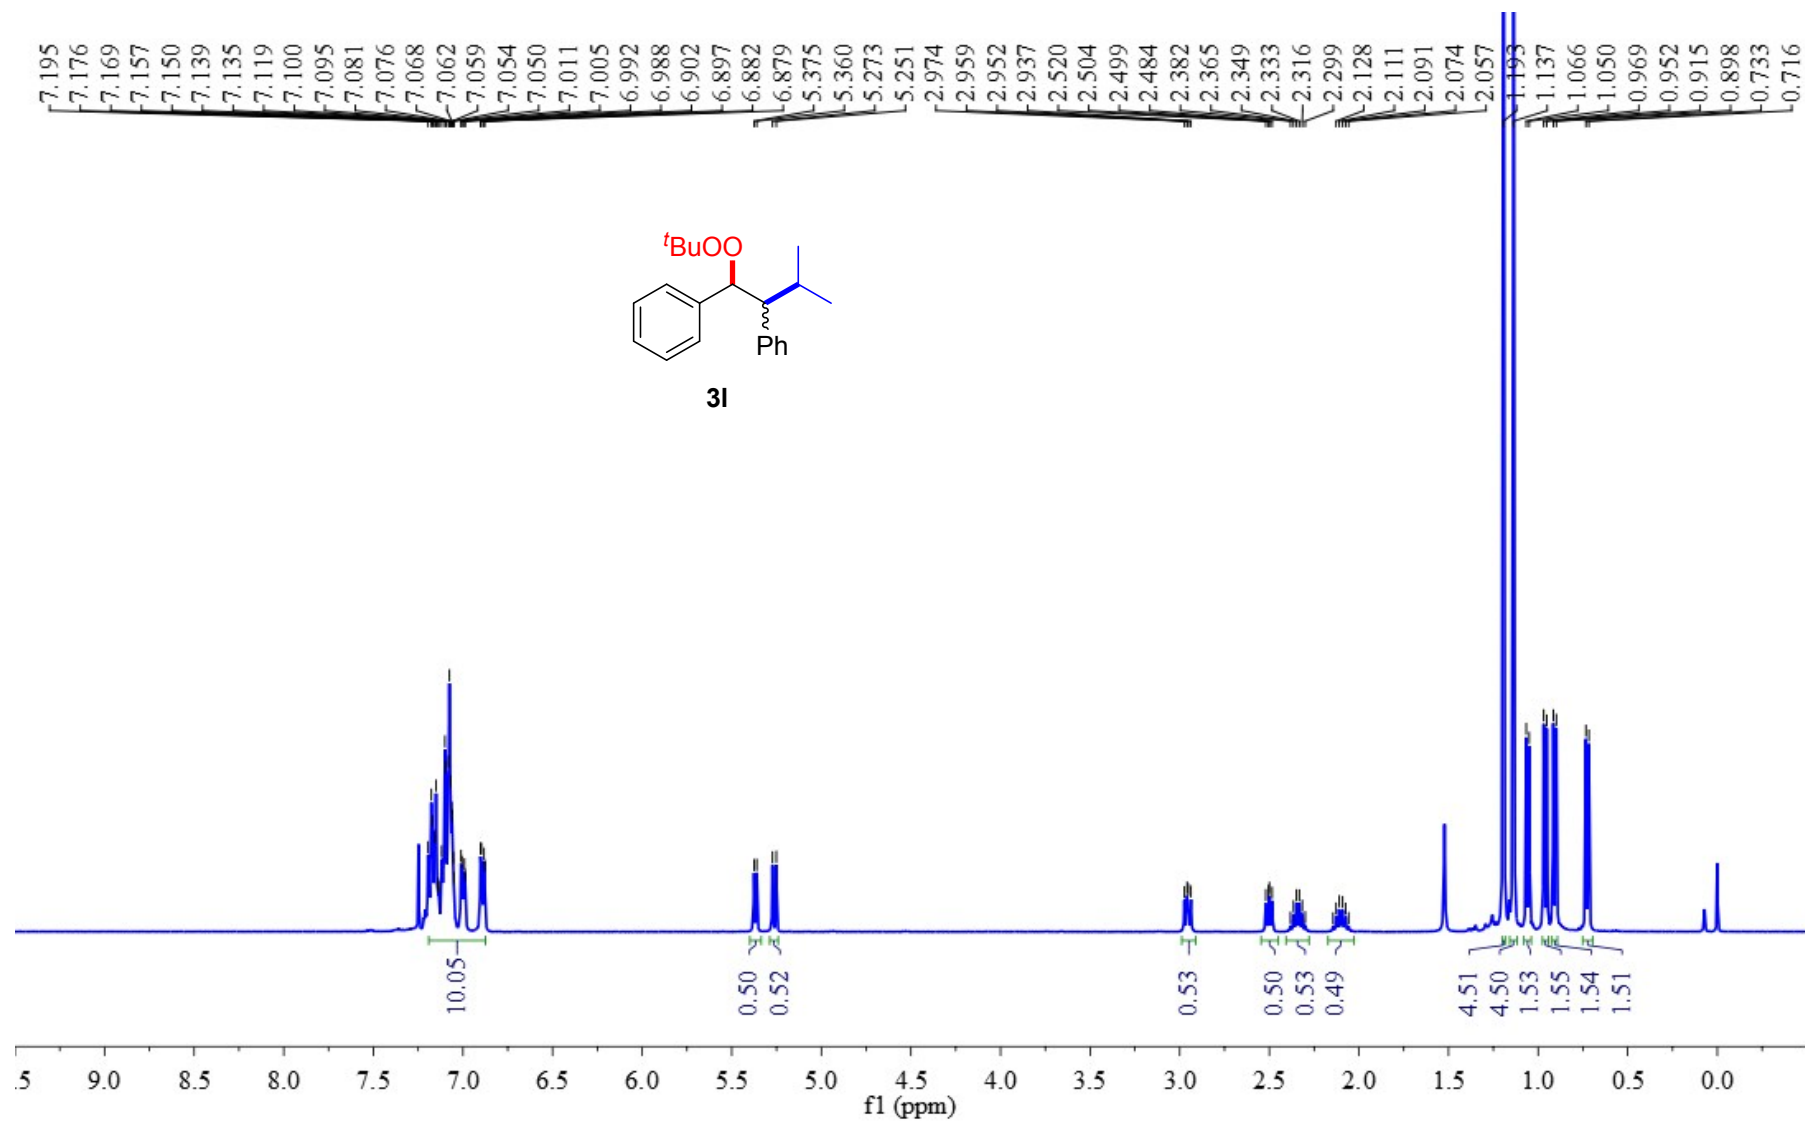

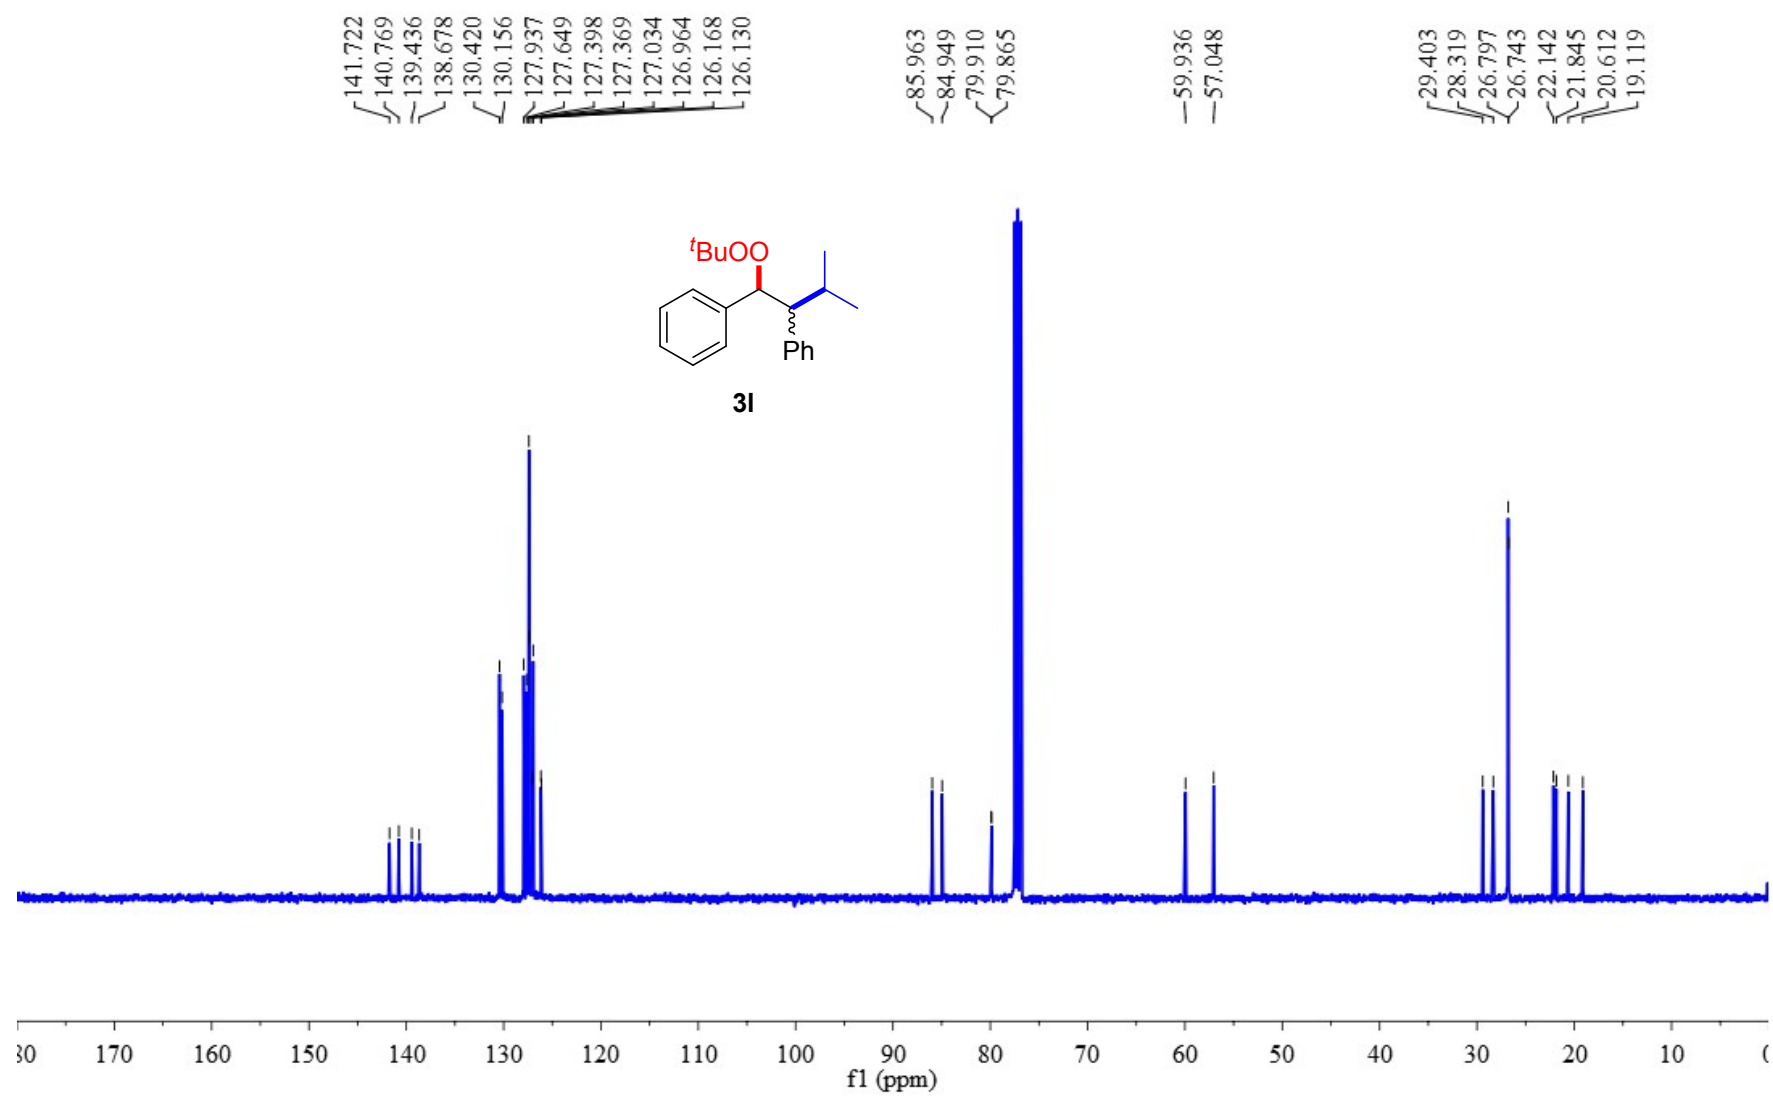

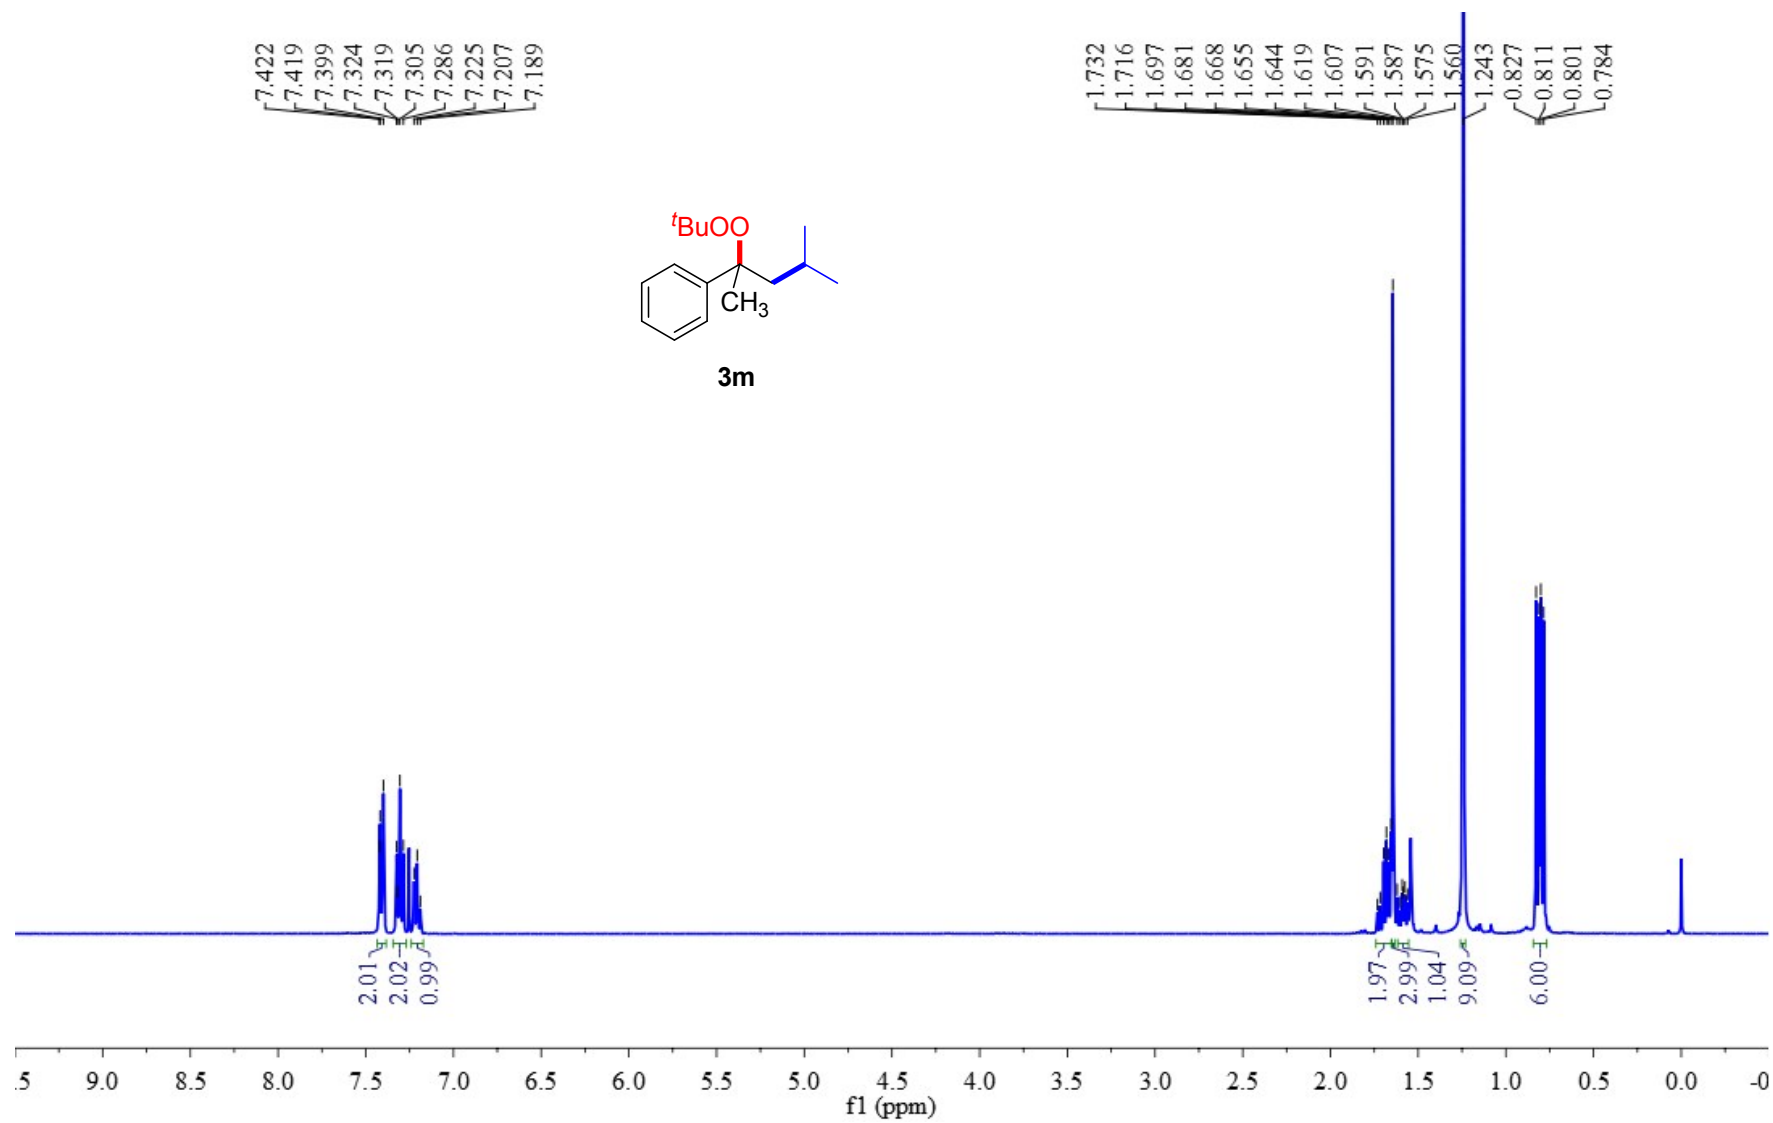

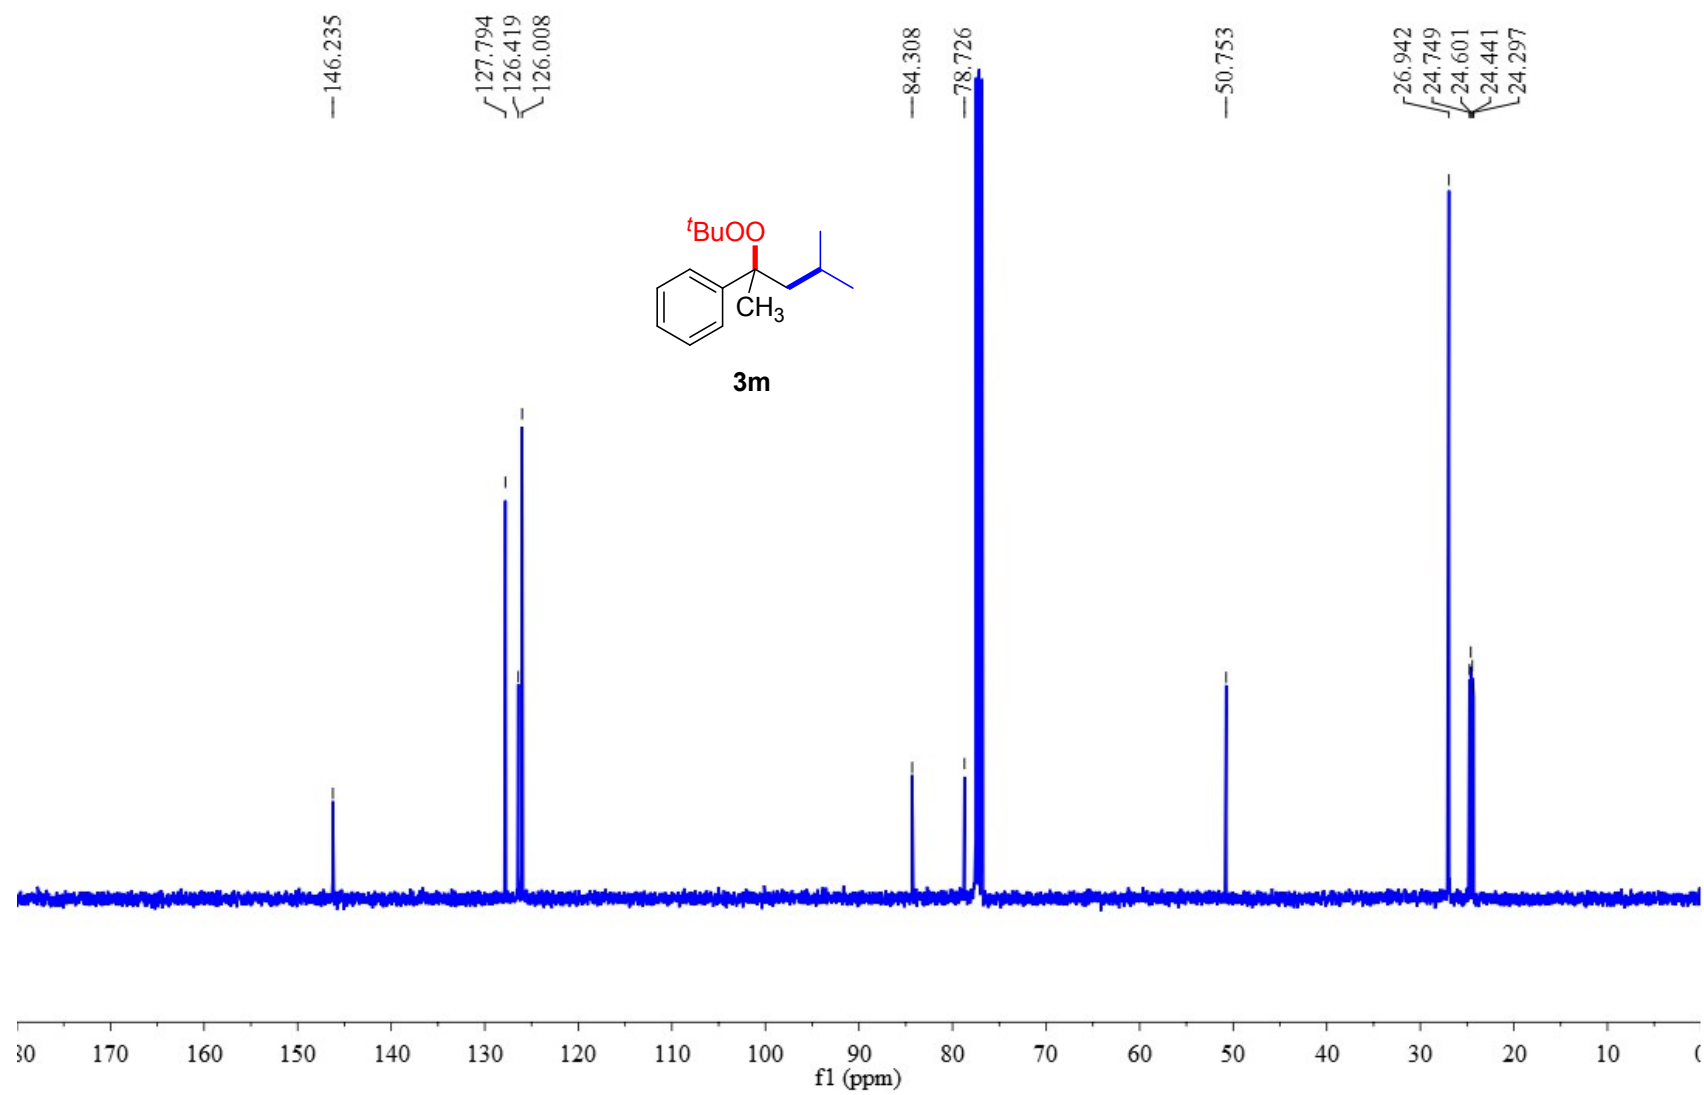

S40

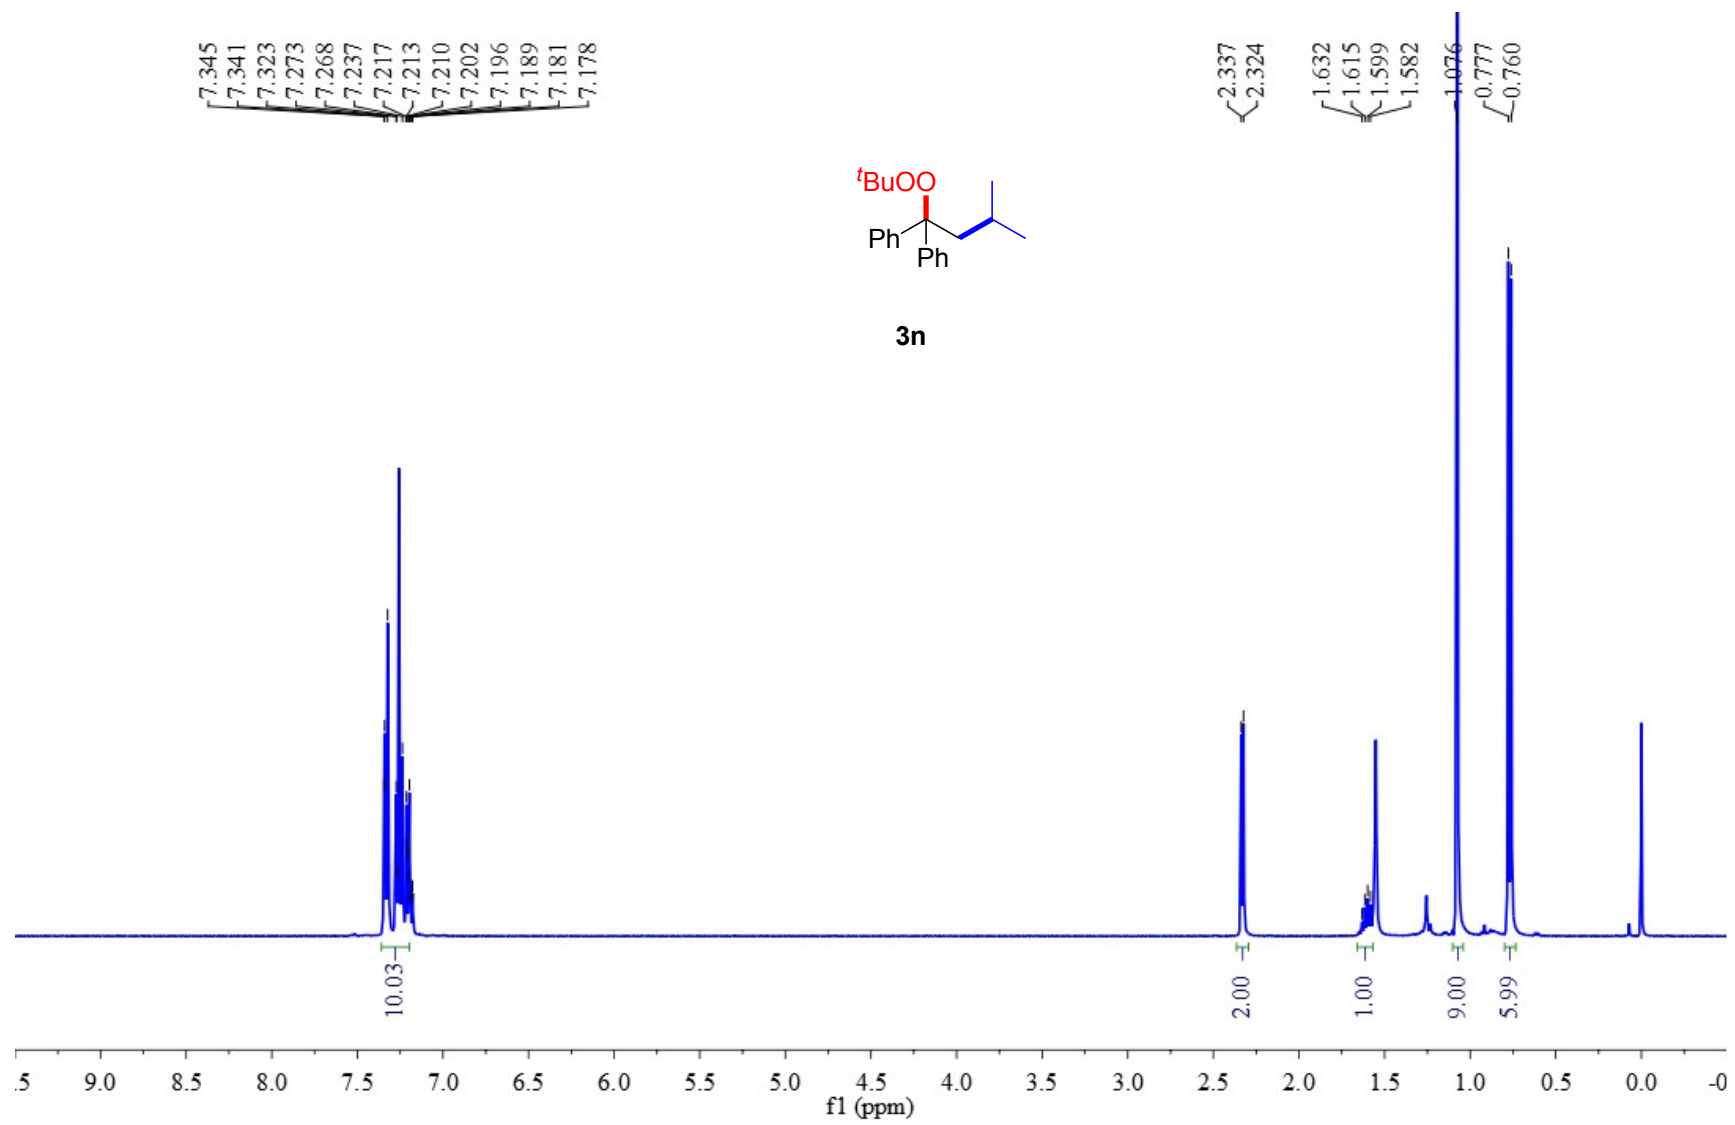

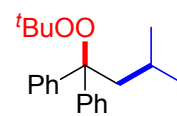

**3n**

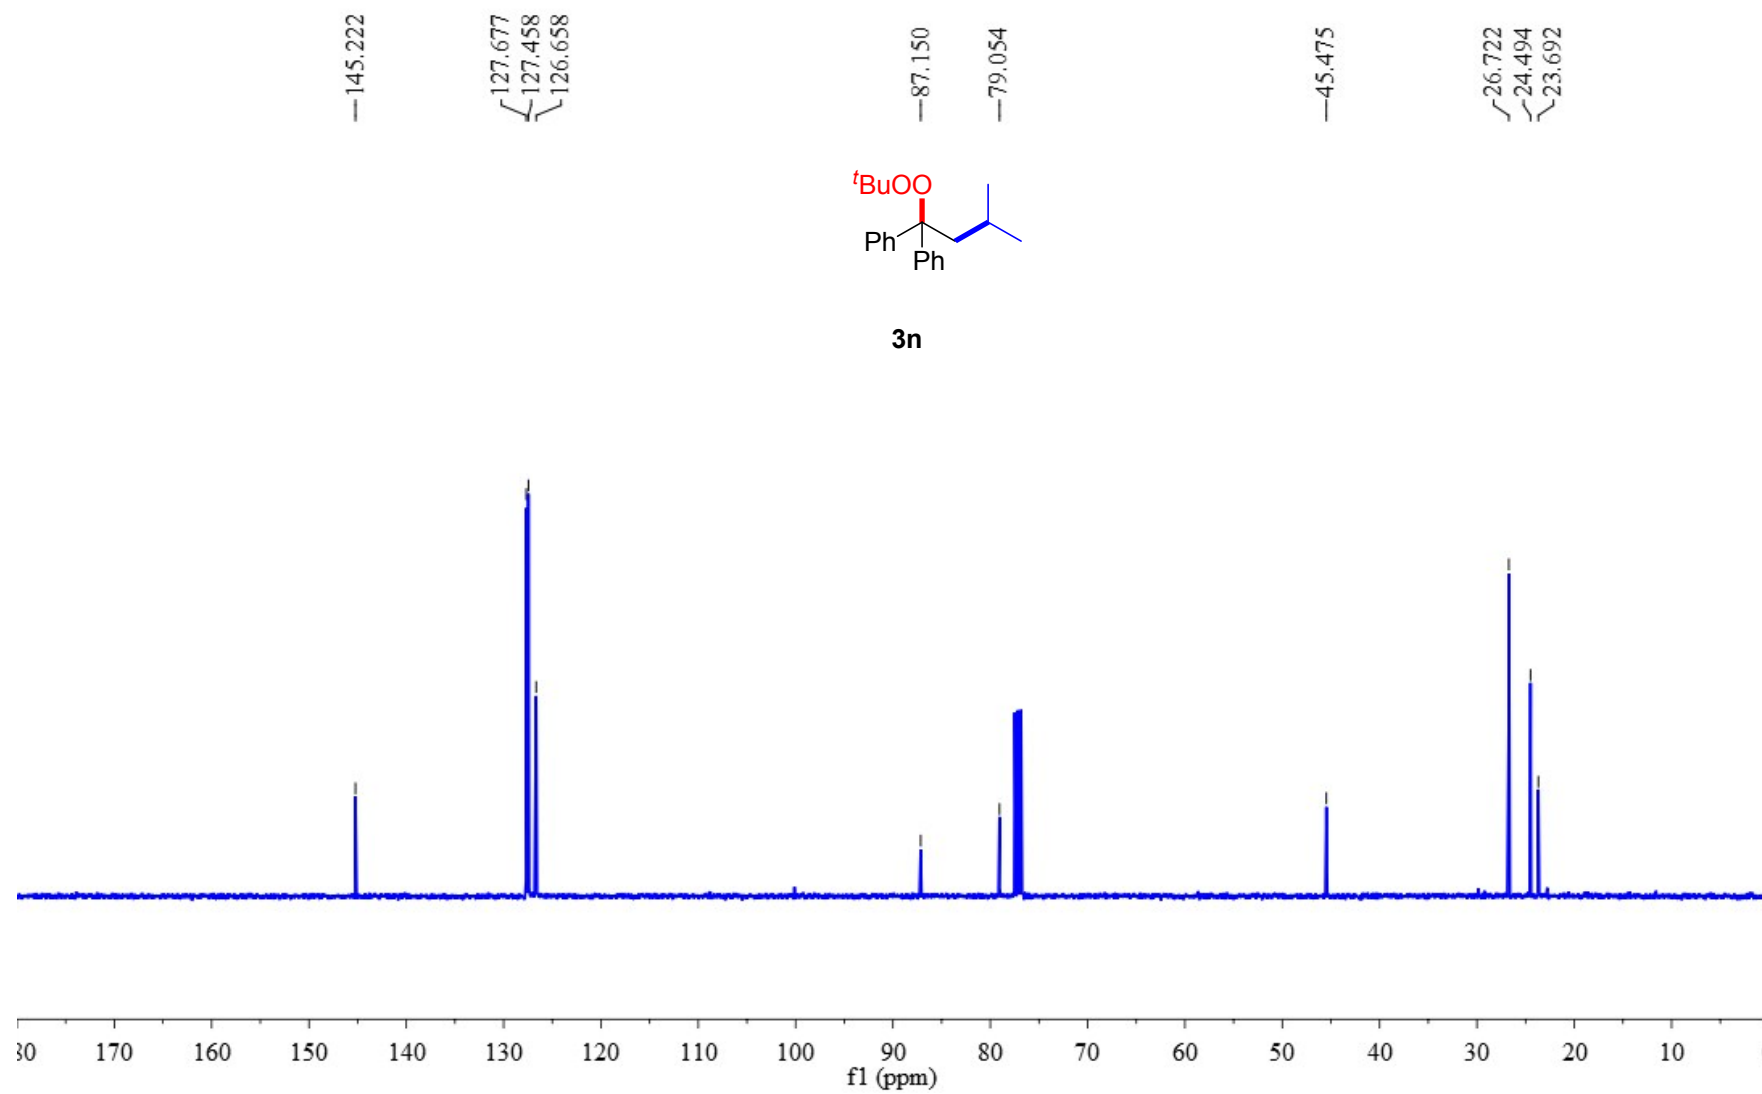

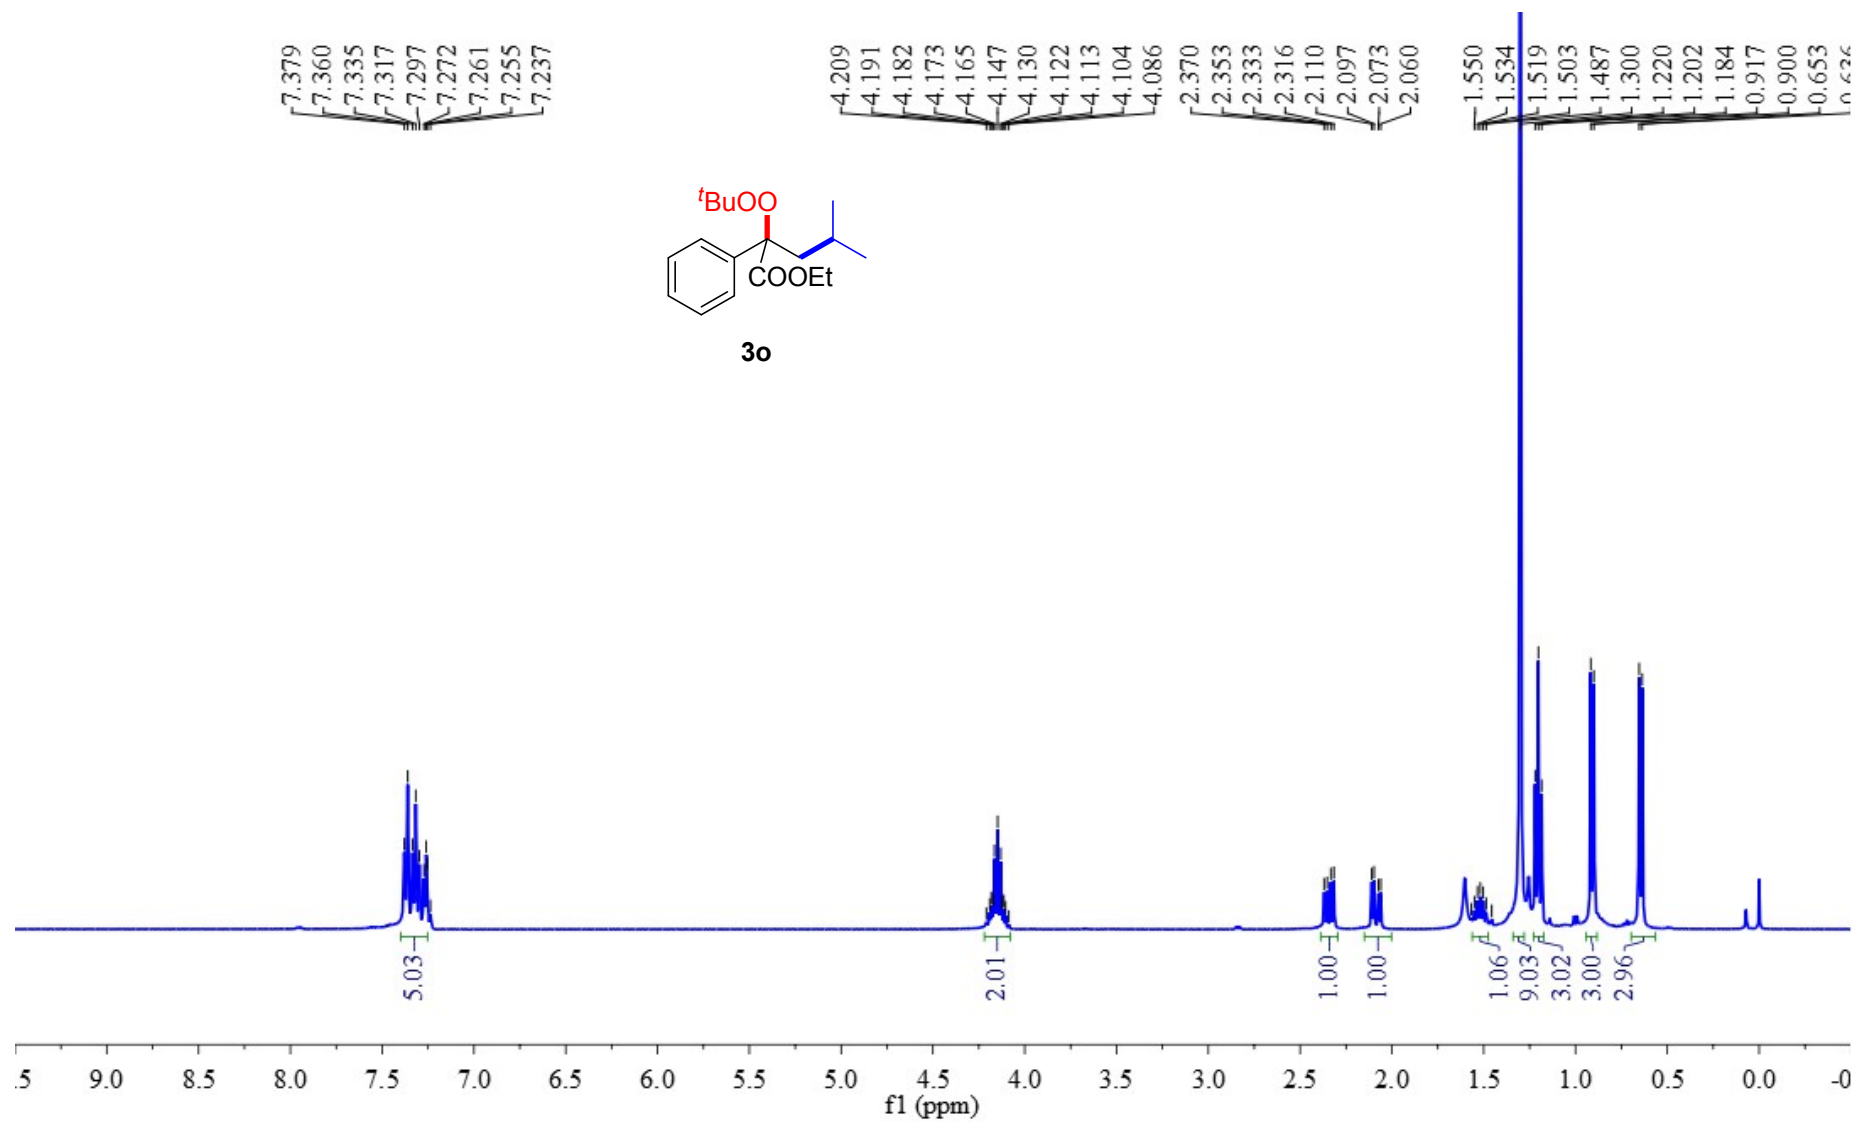

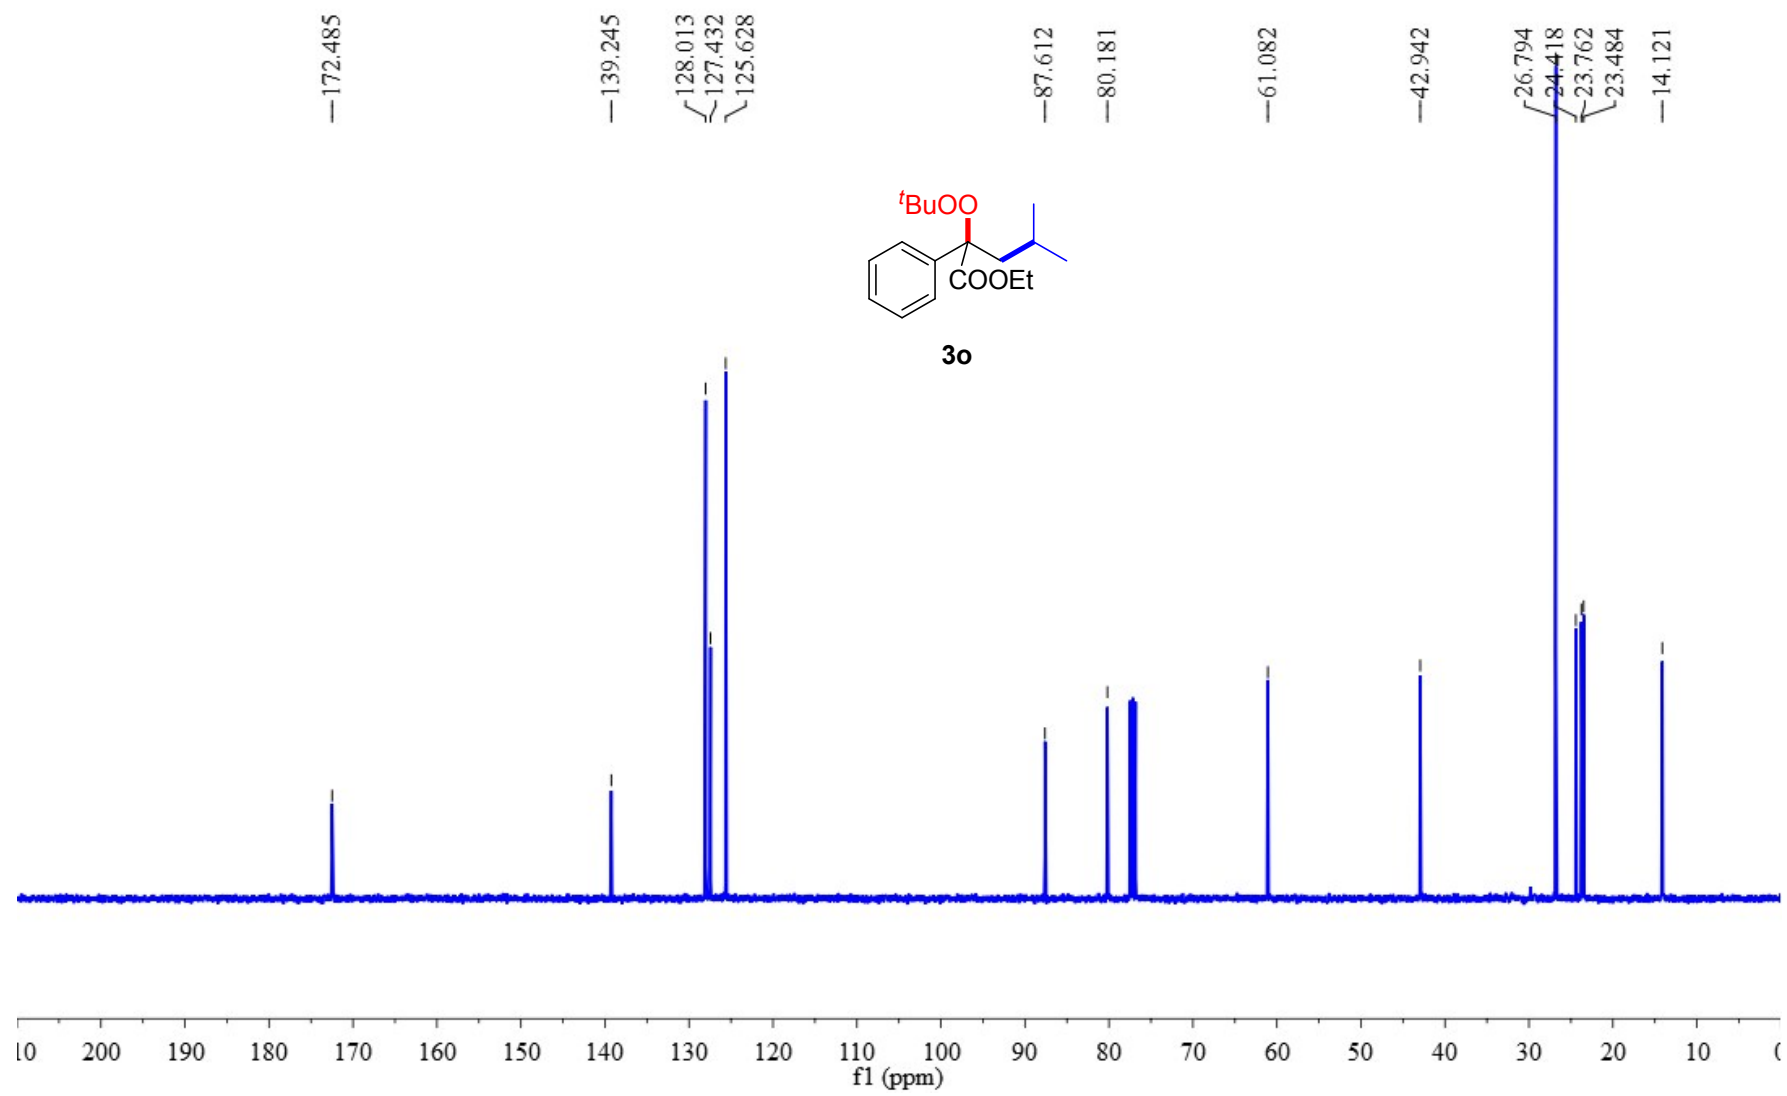



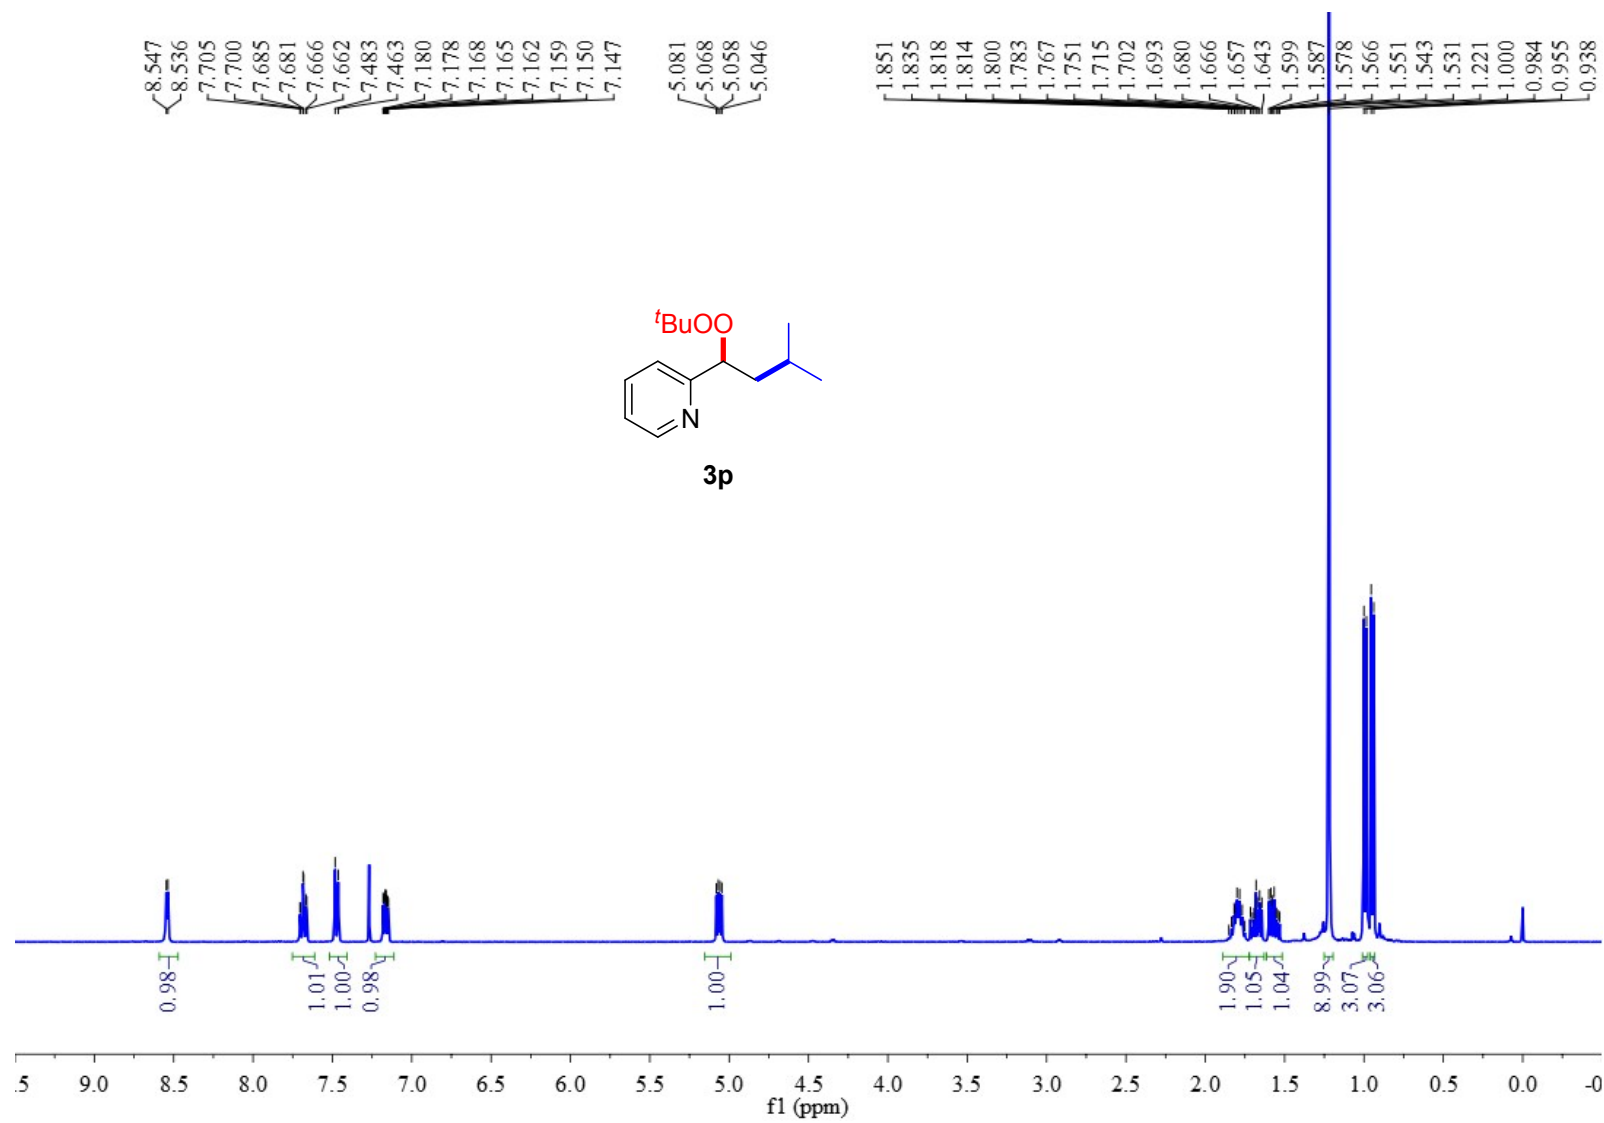

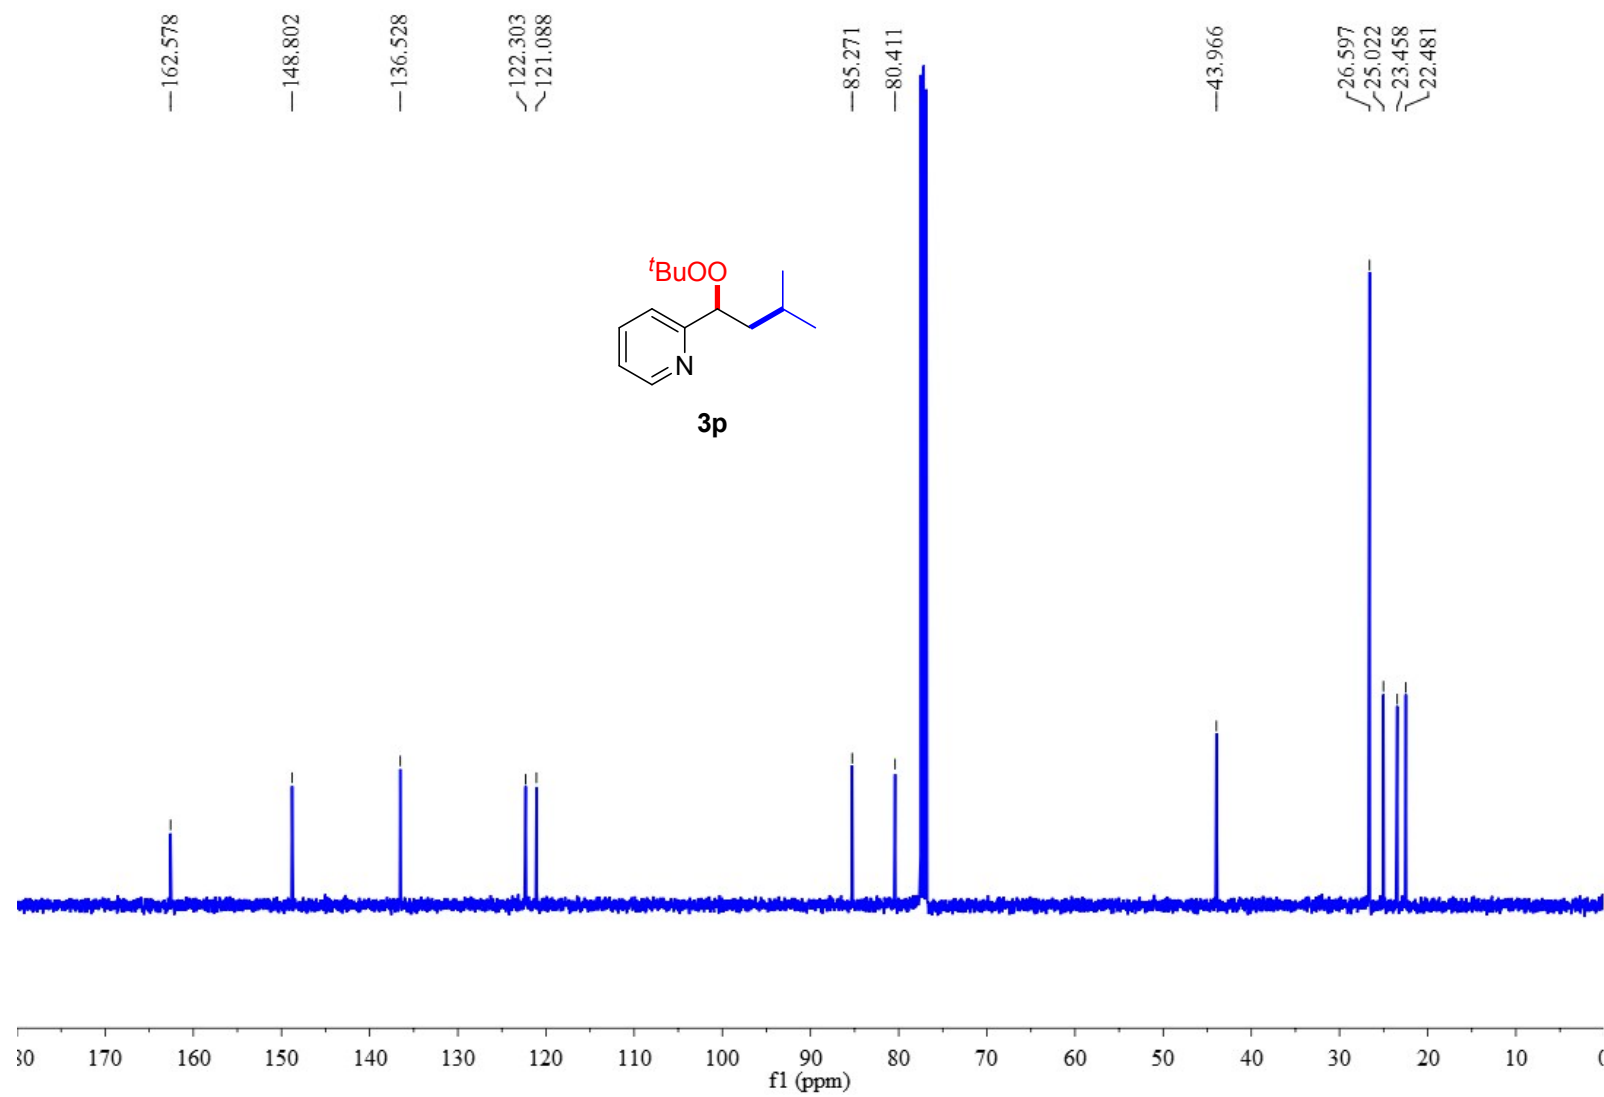

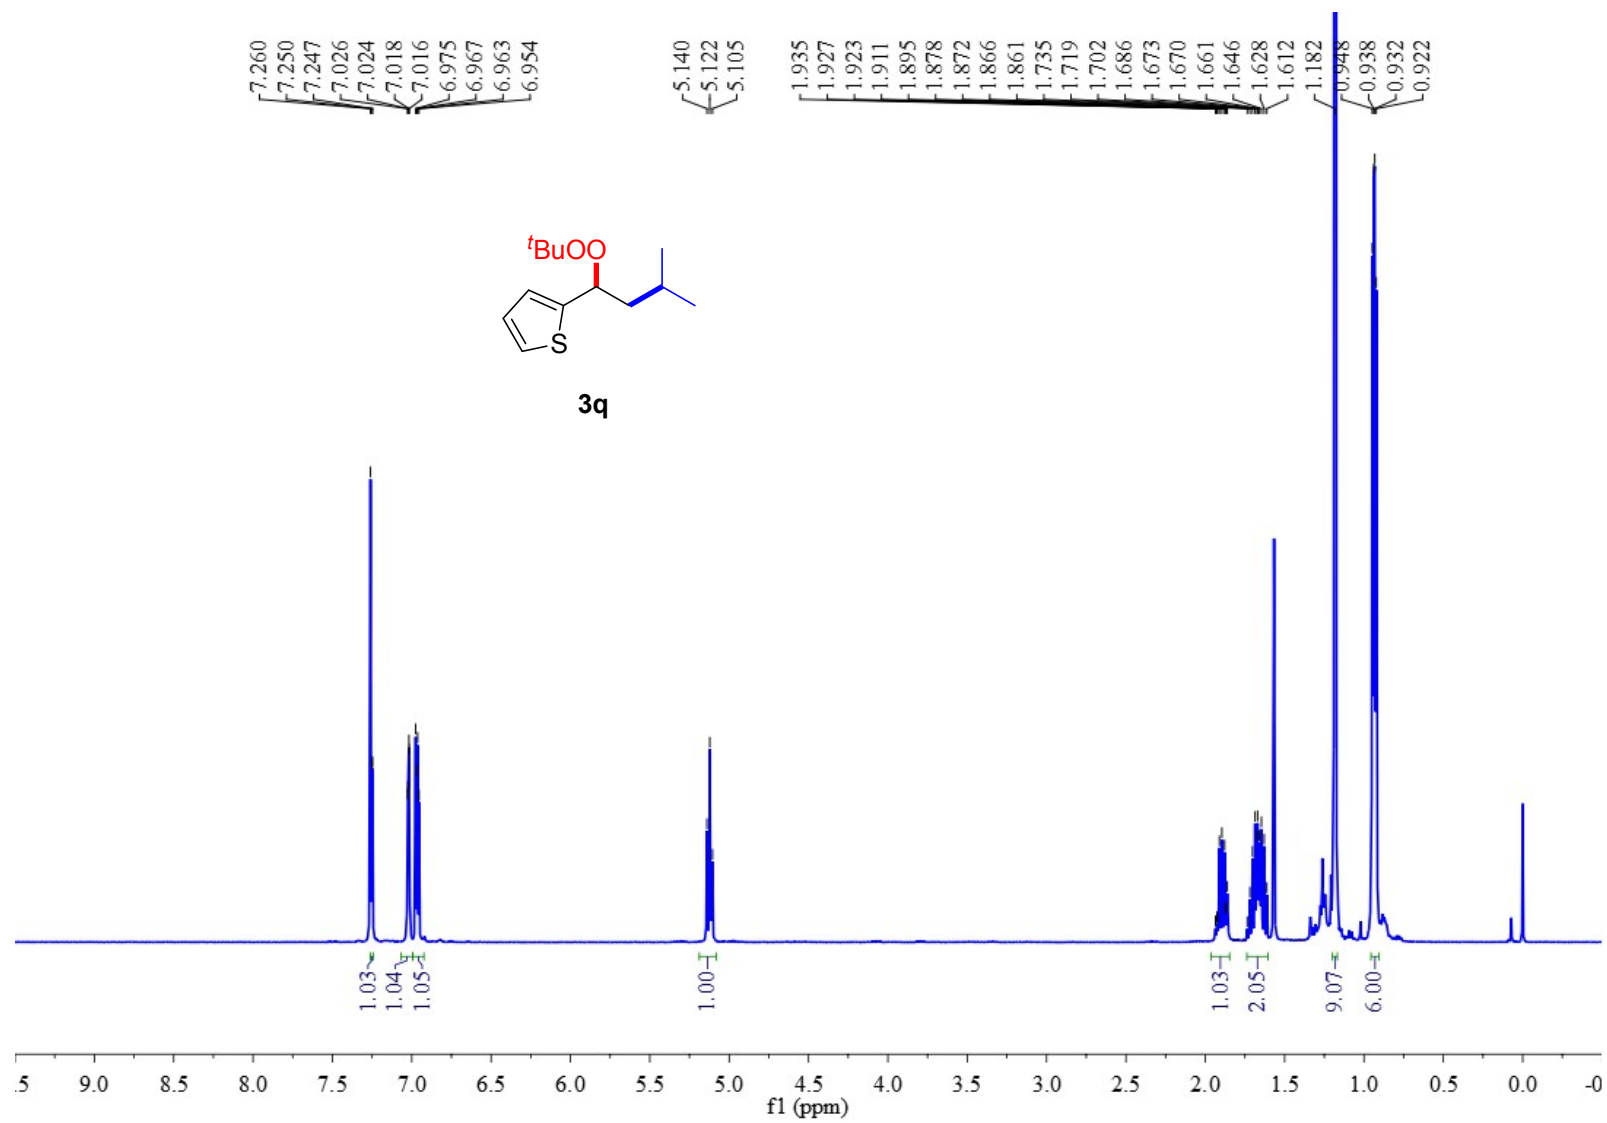

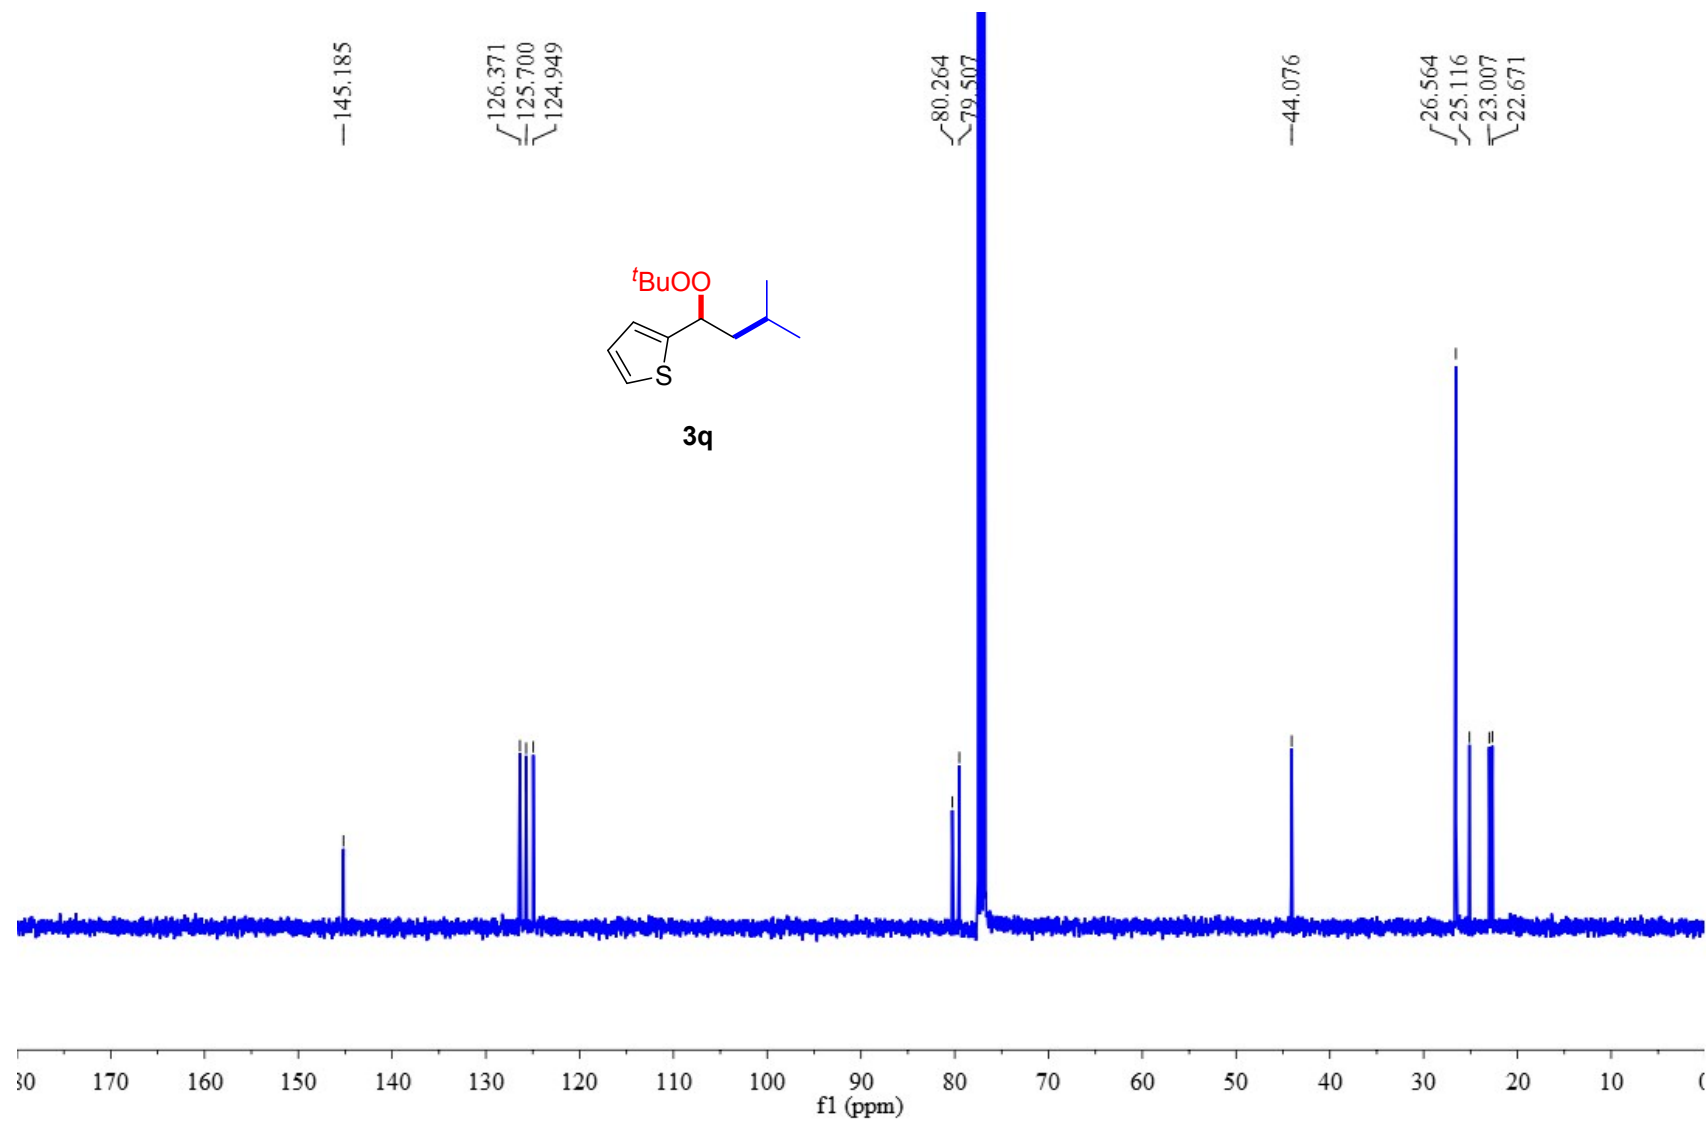

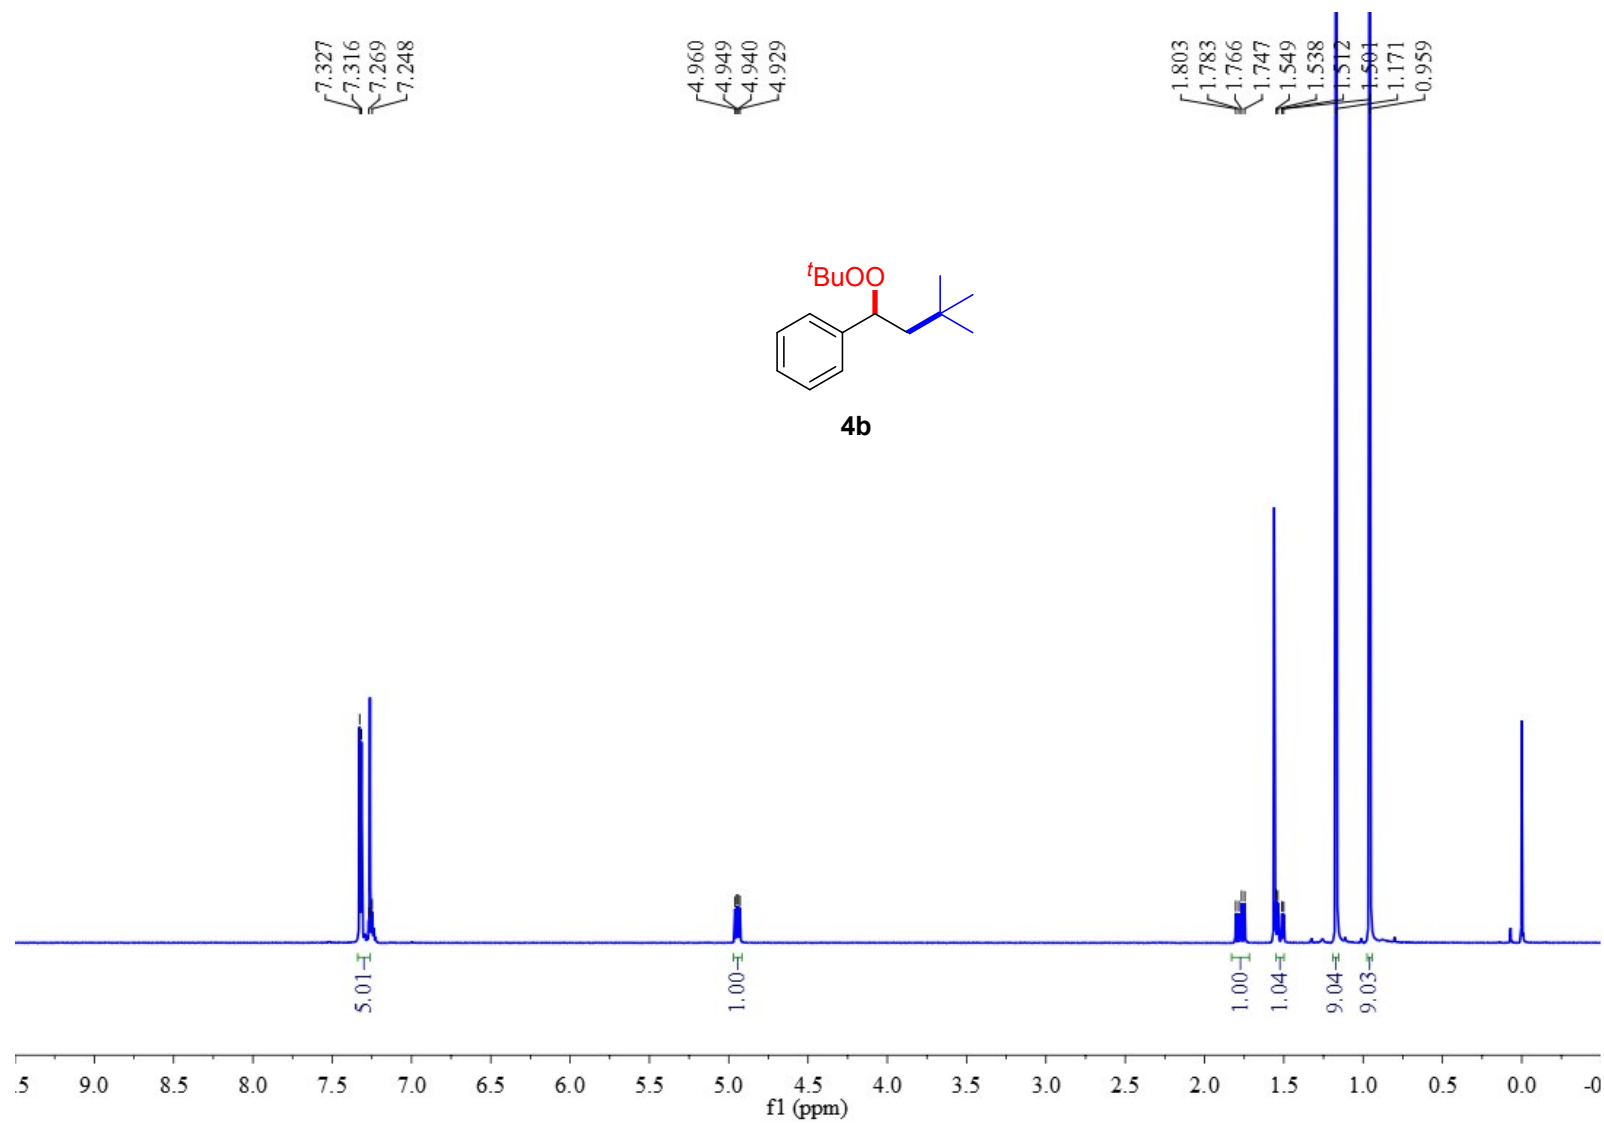

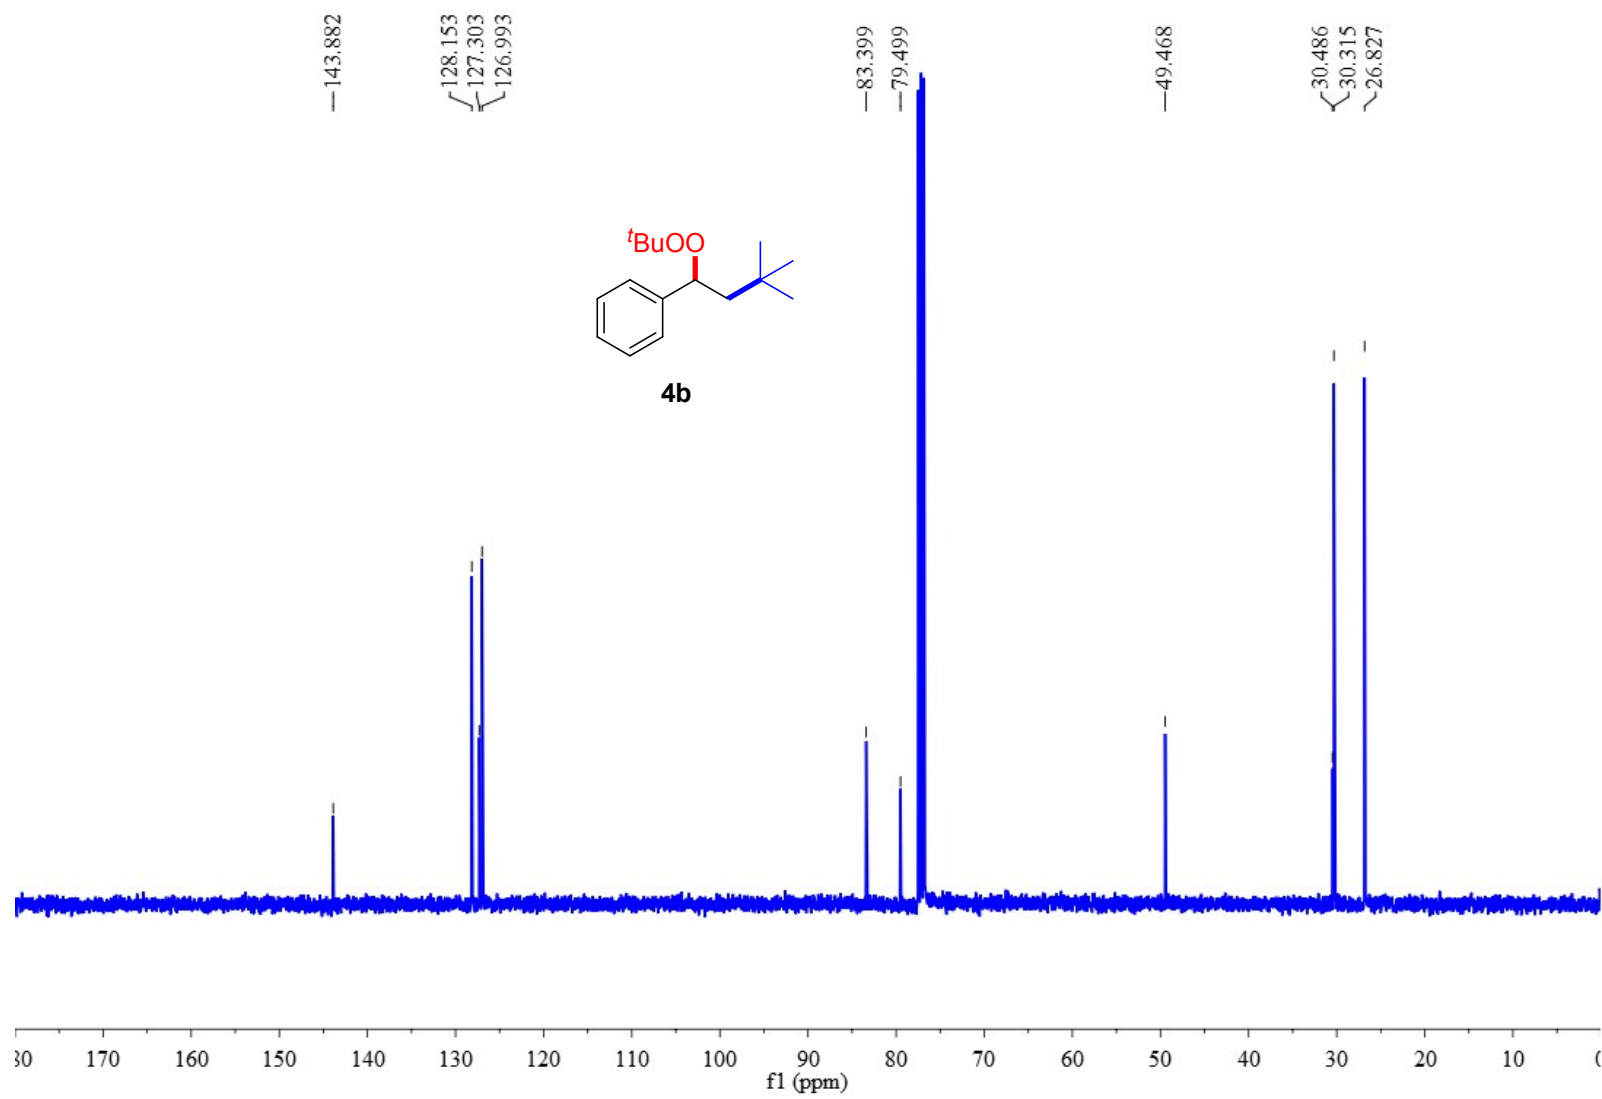

S50

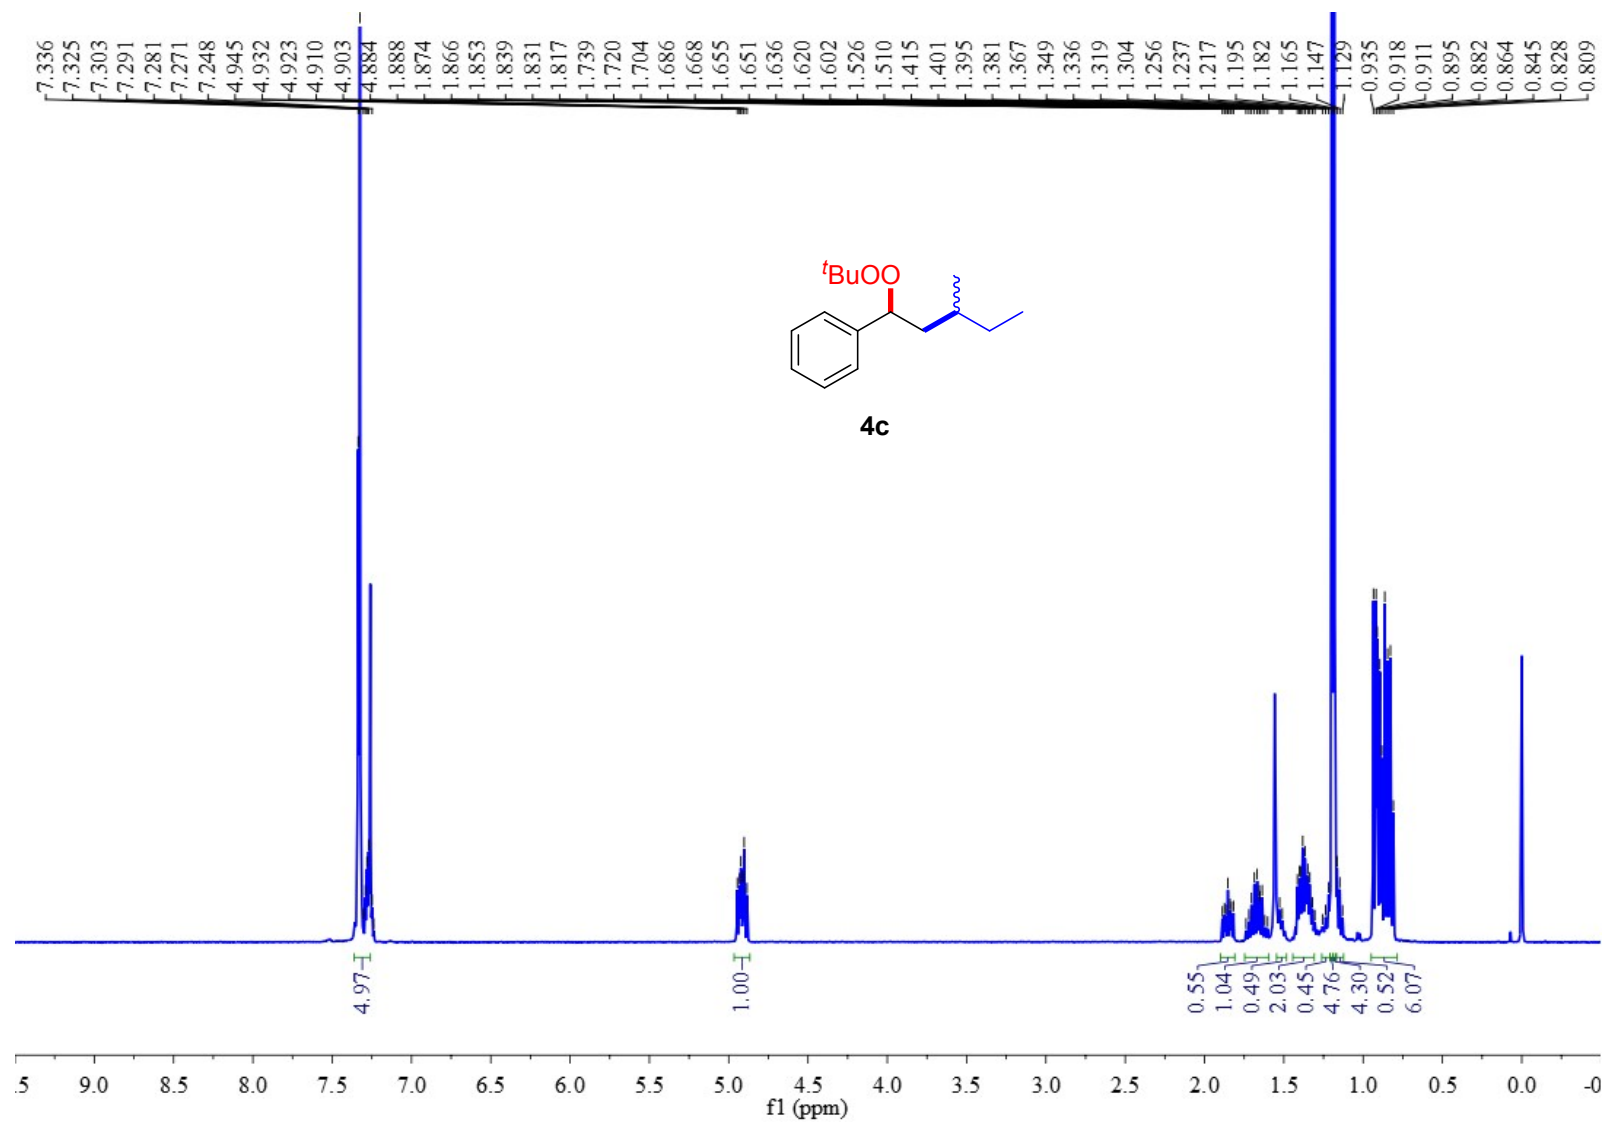

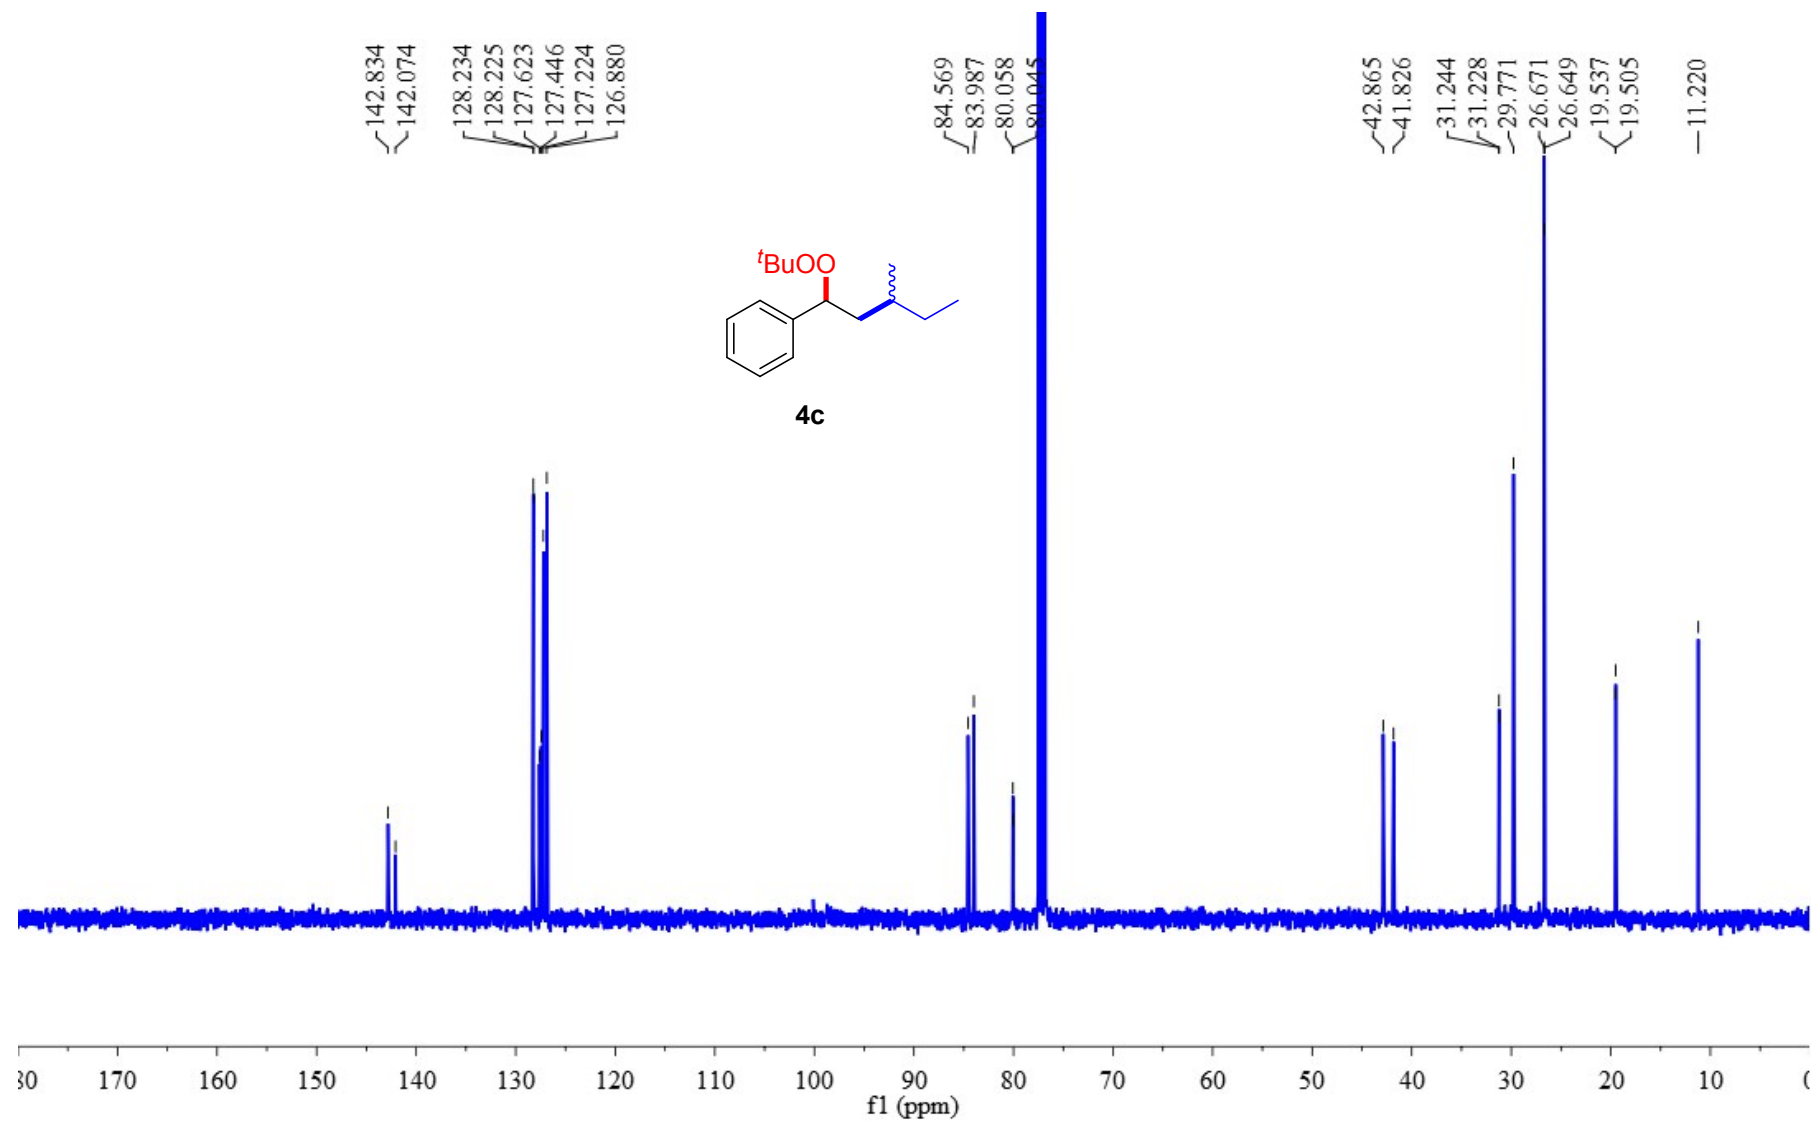



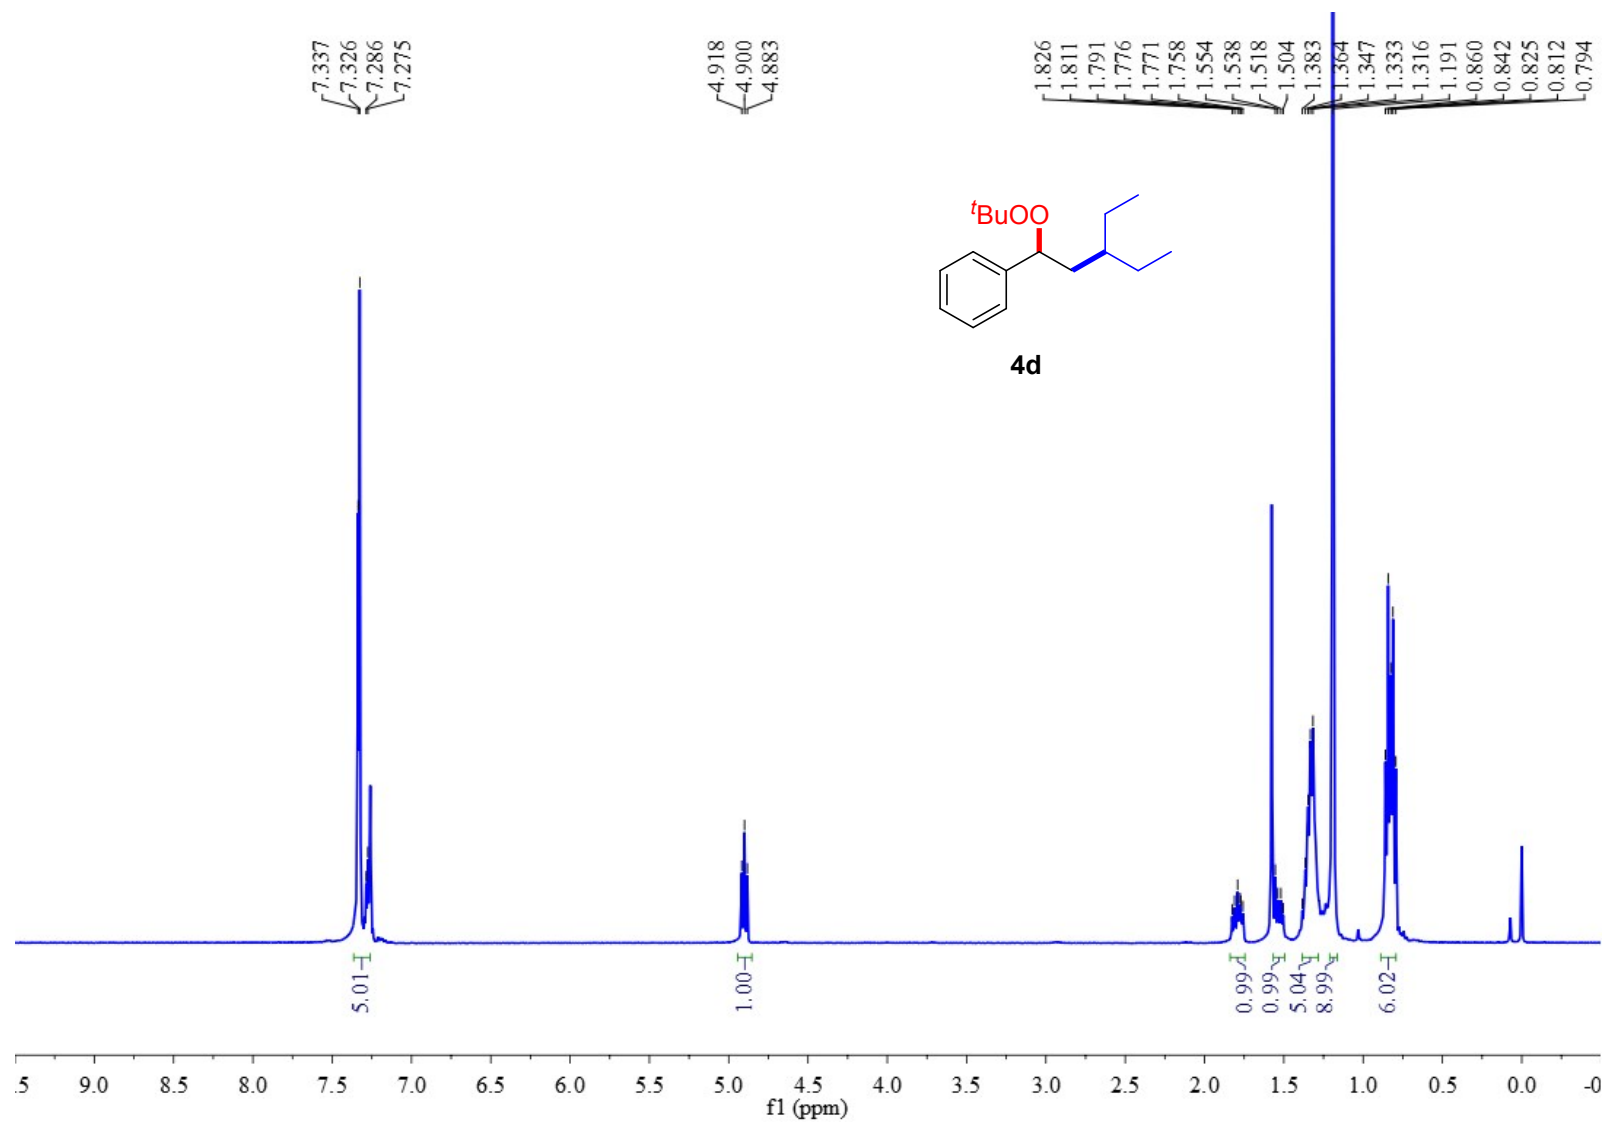

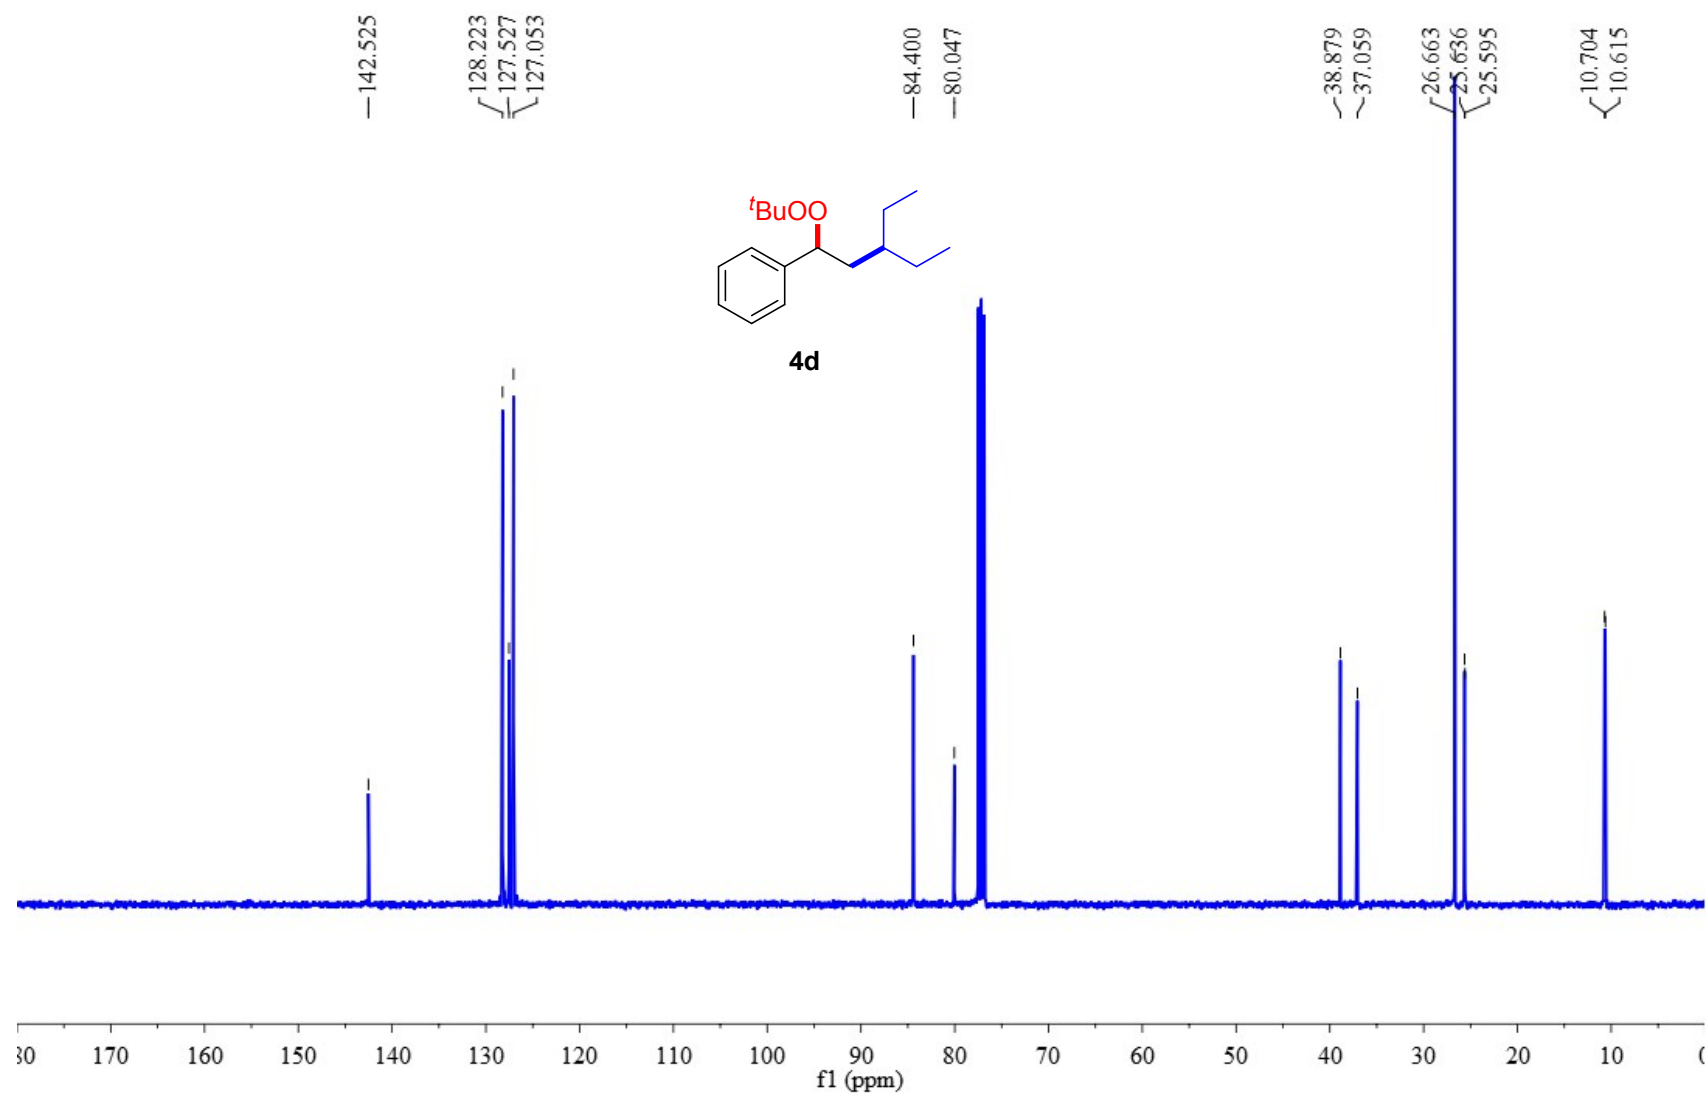

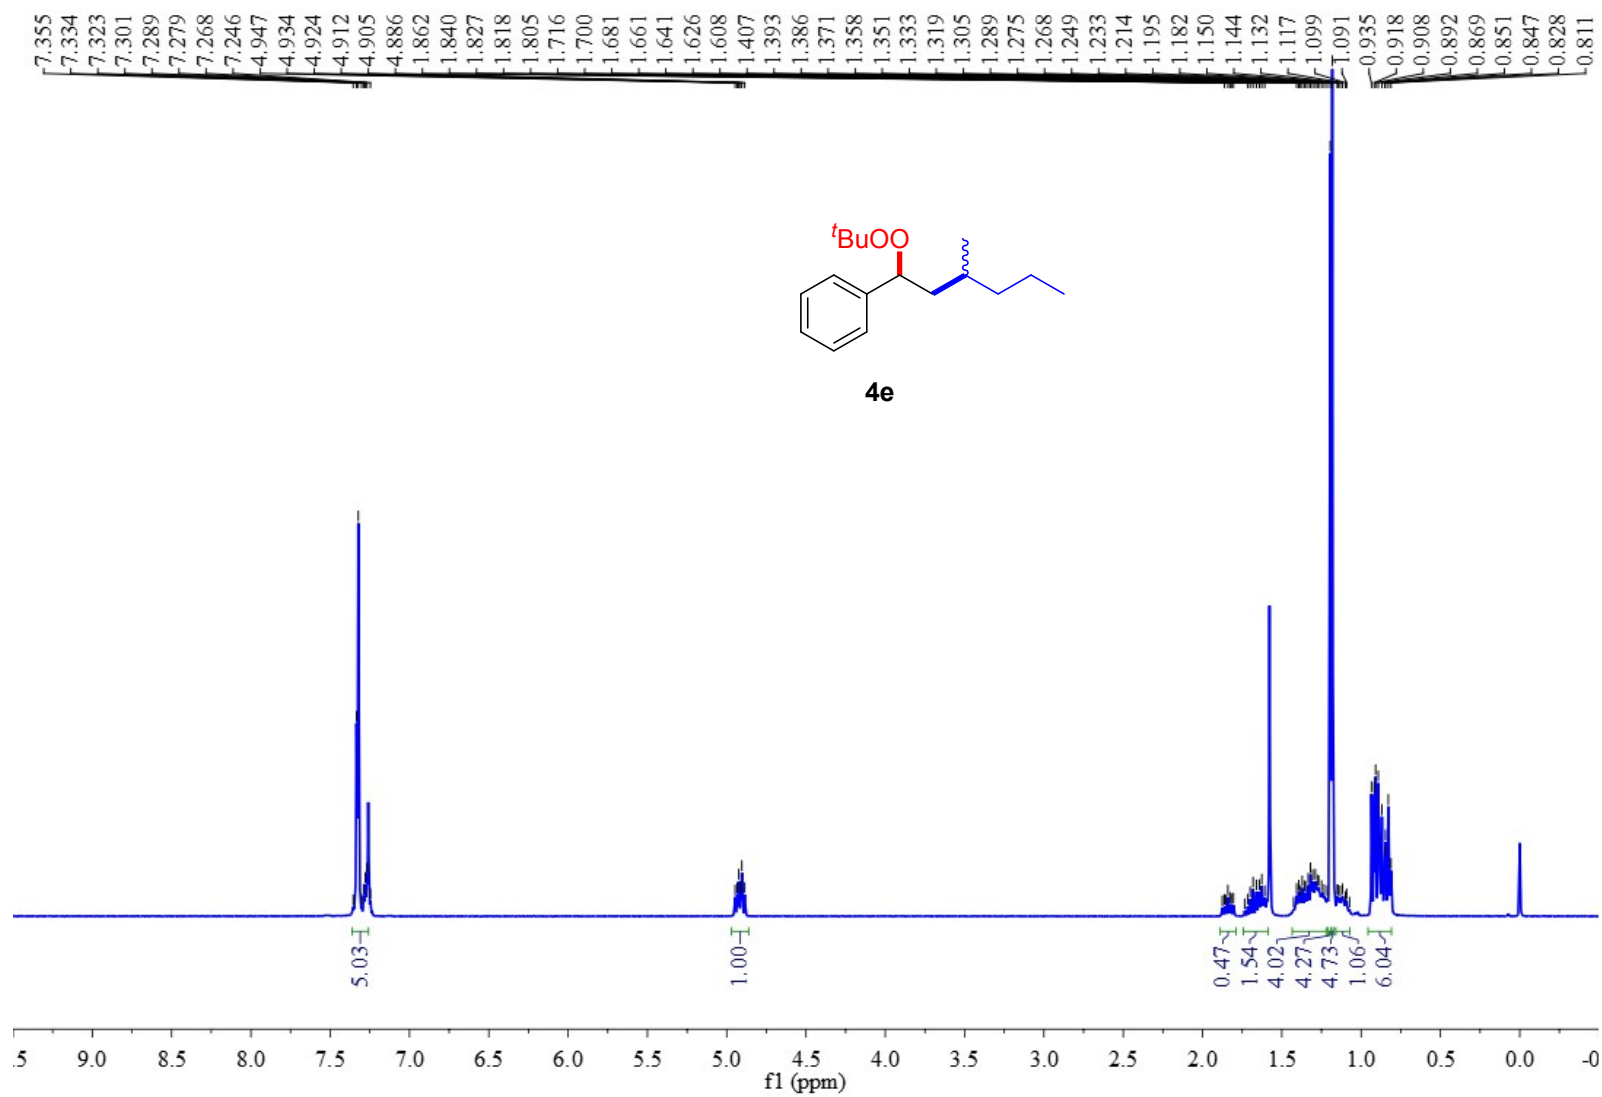

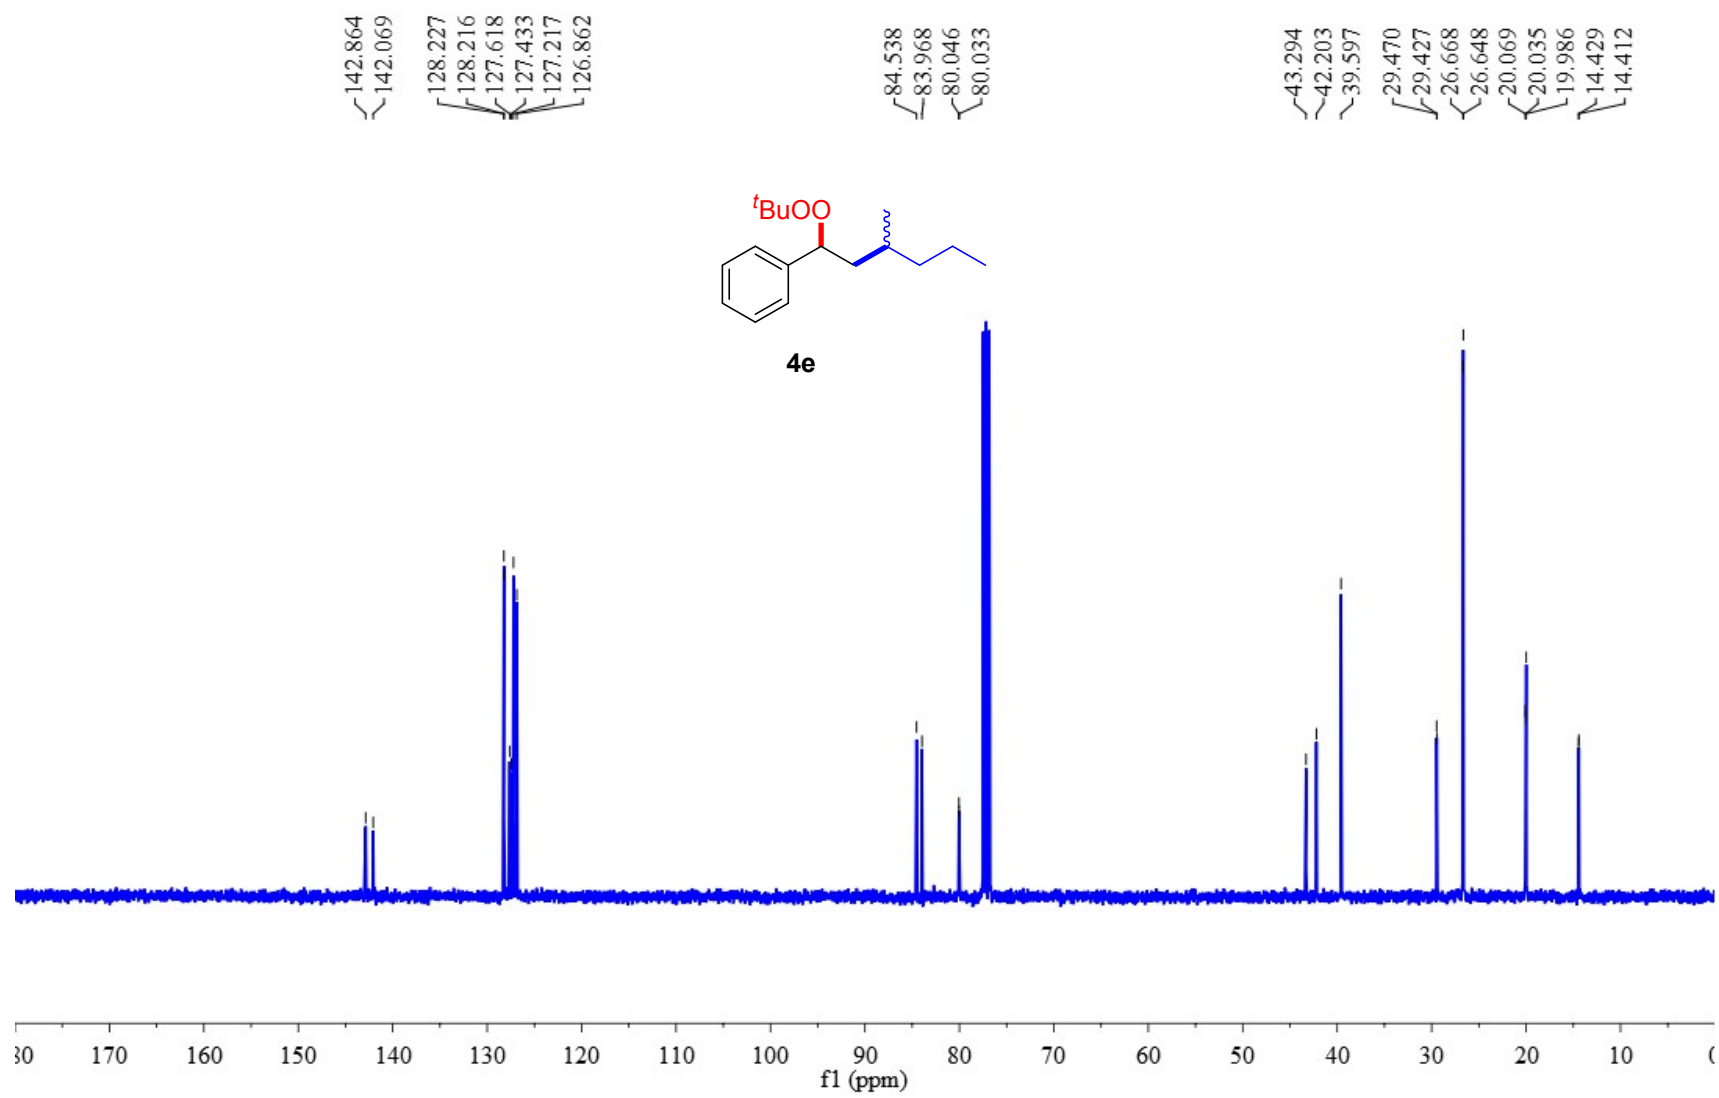

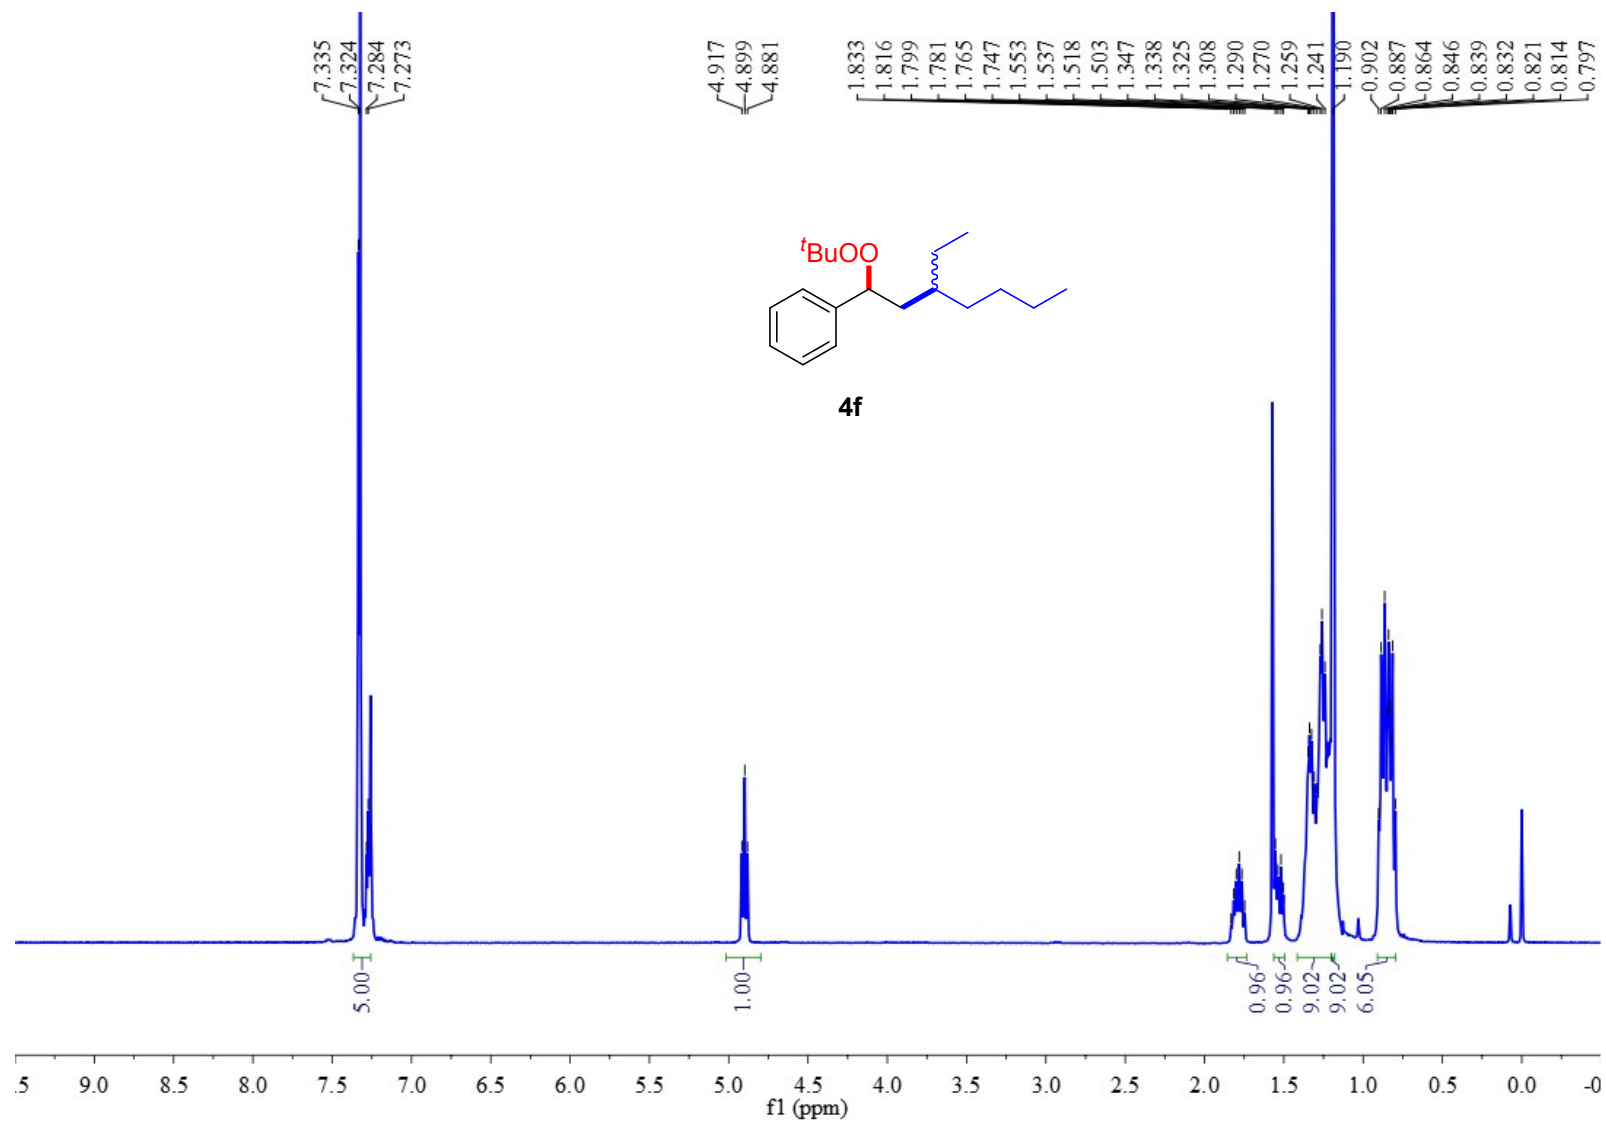

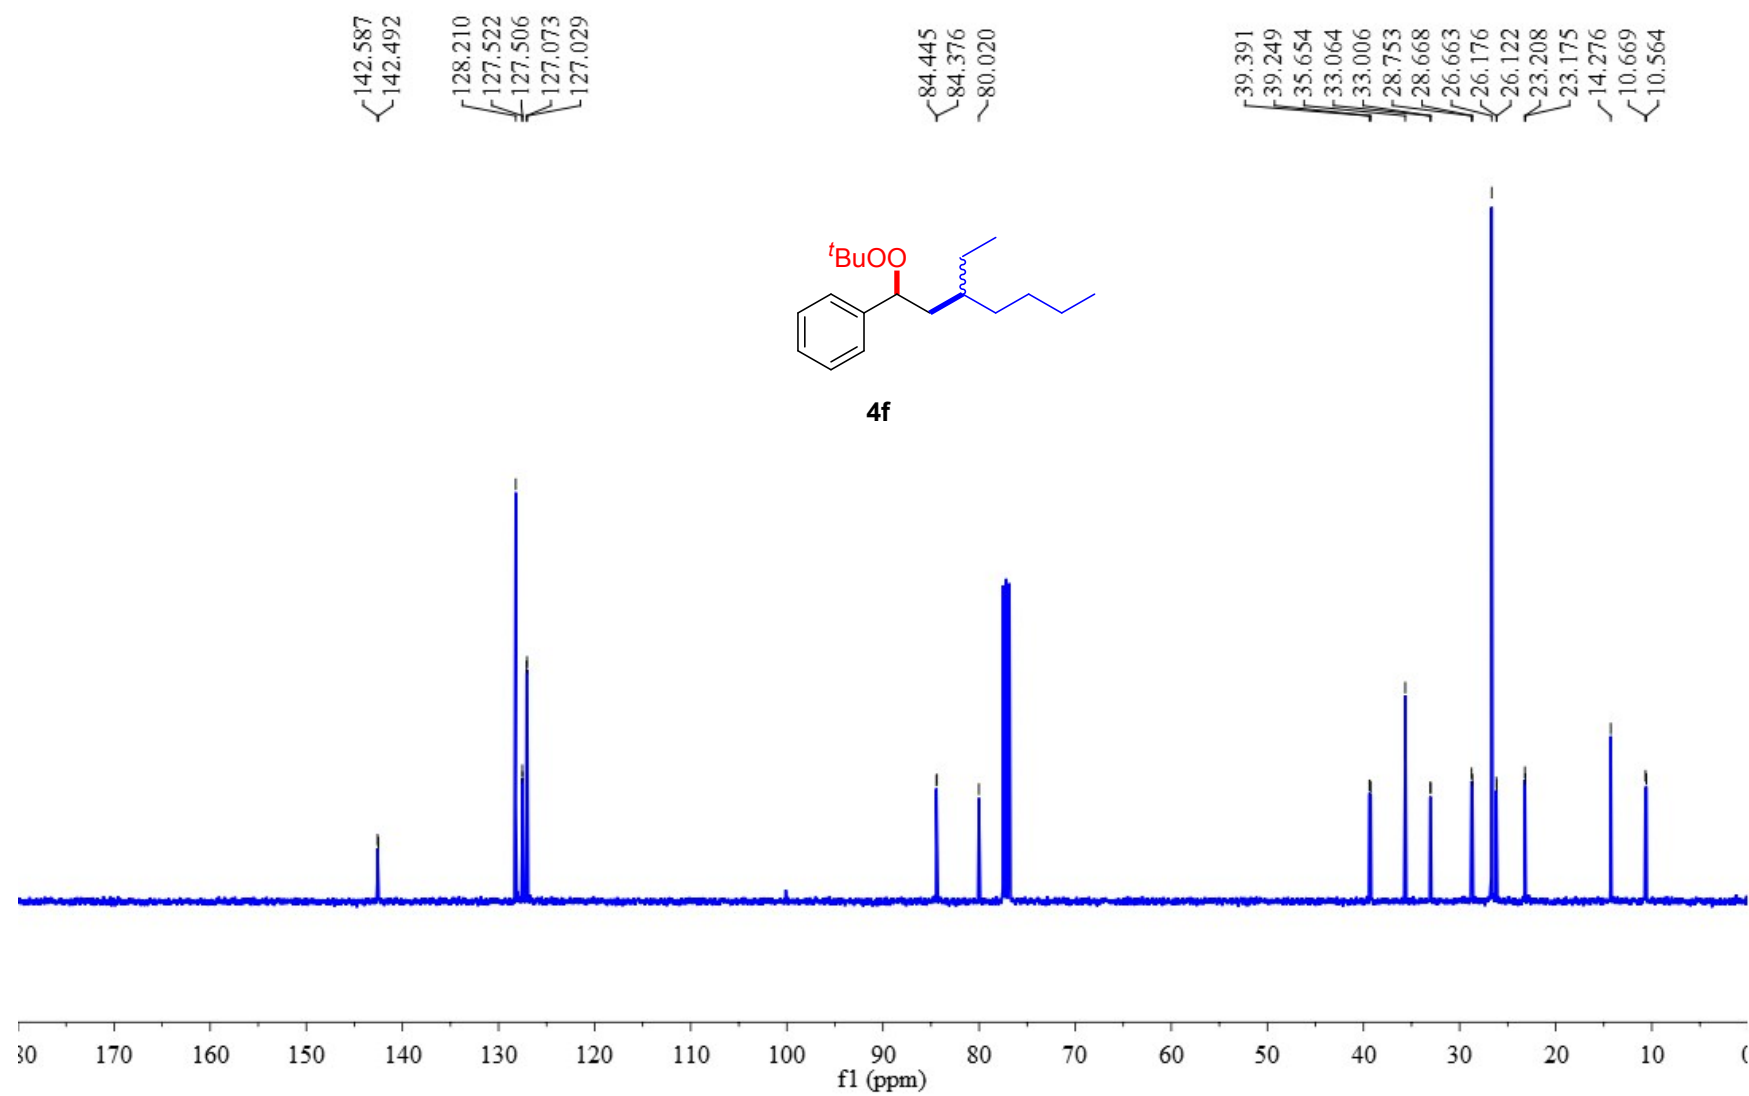

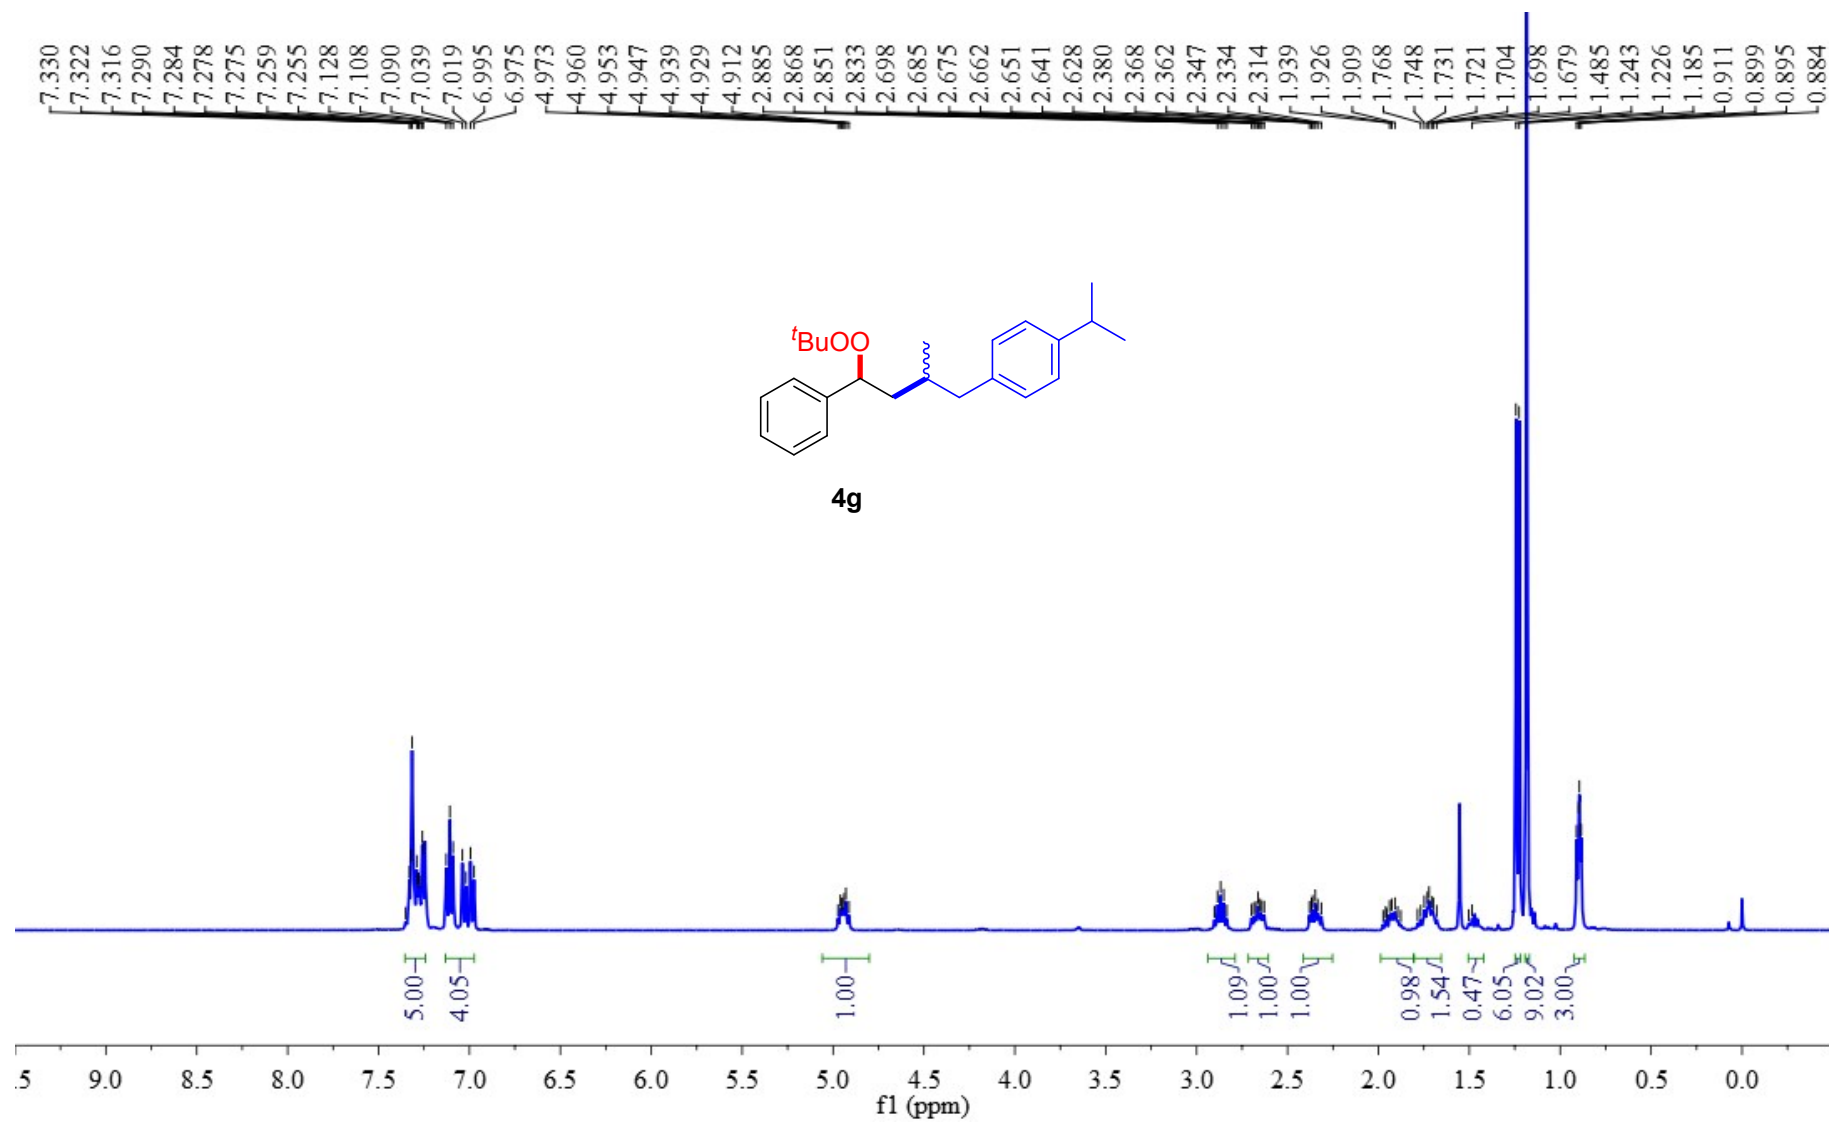

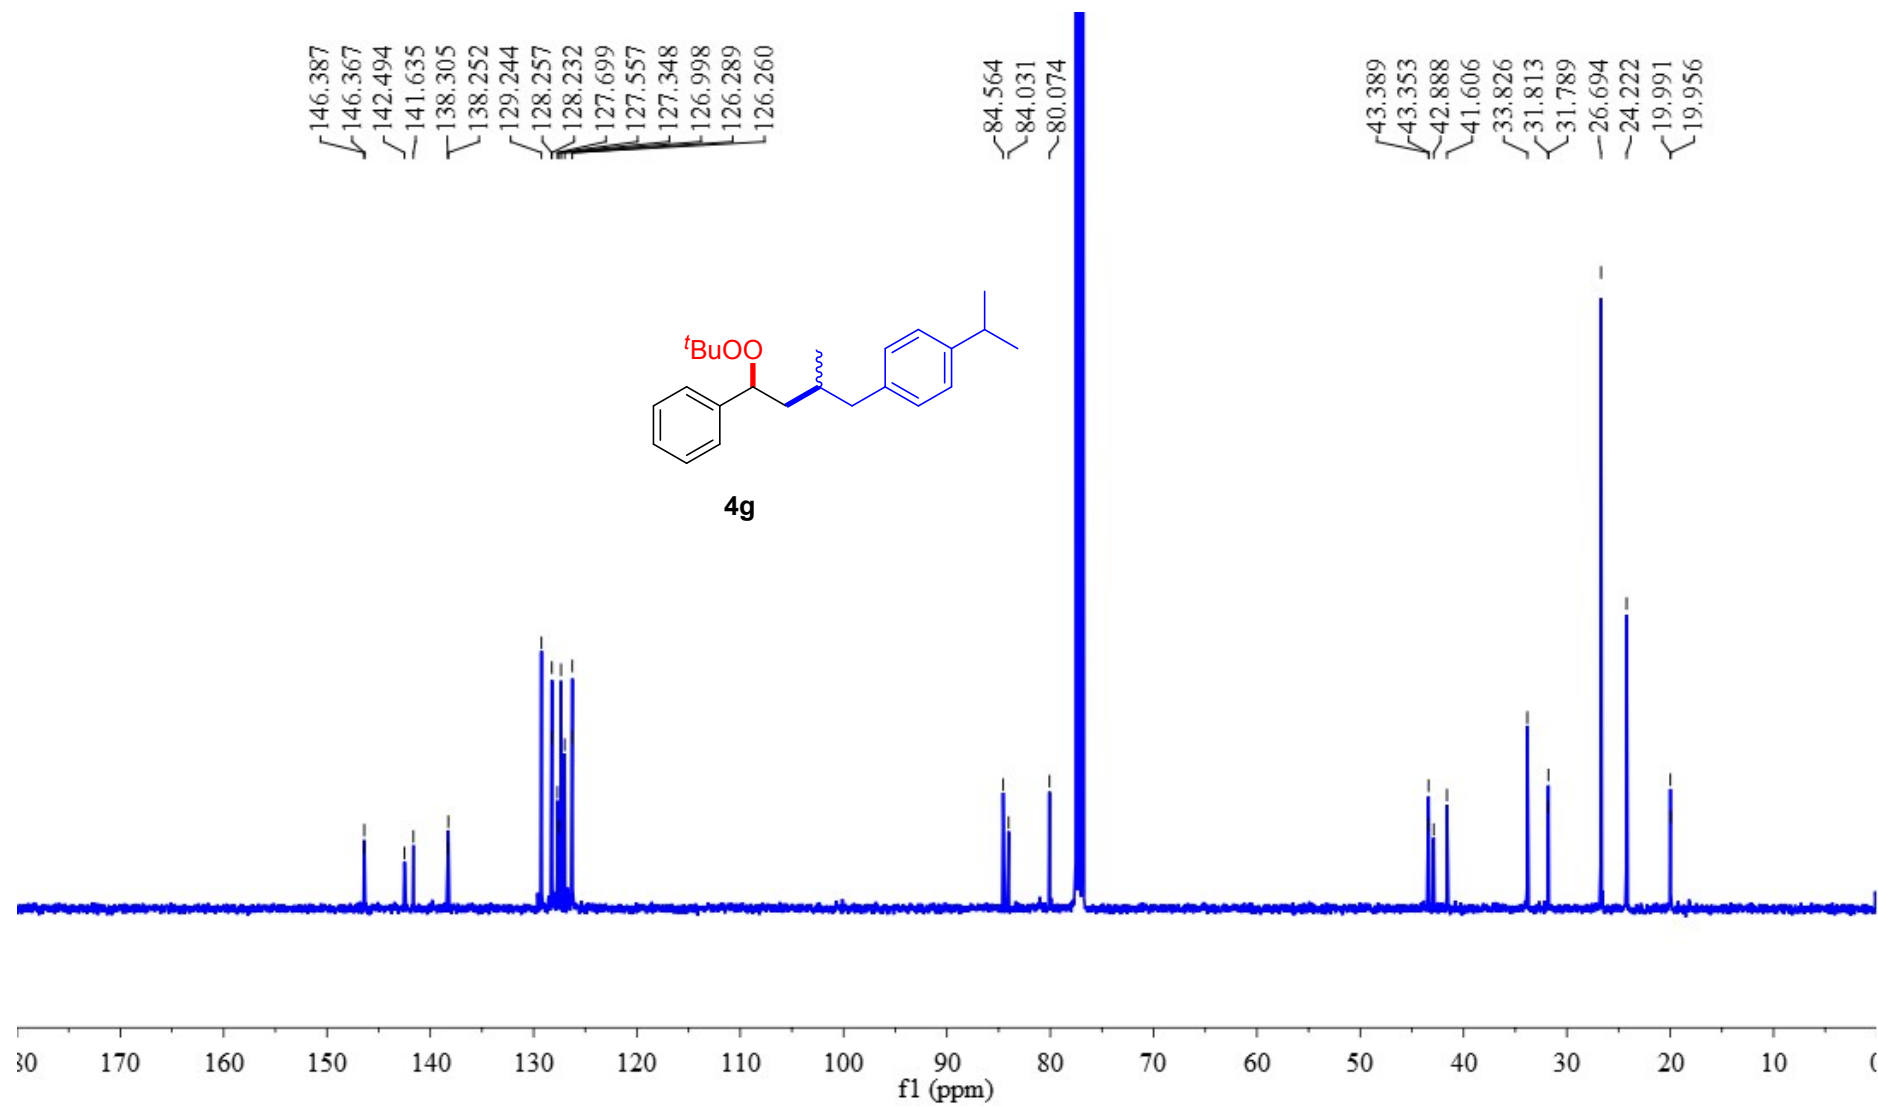



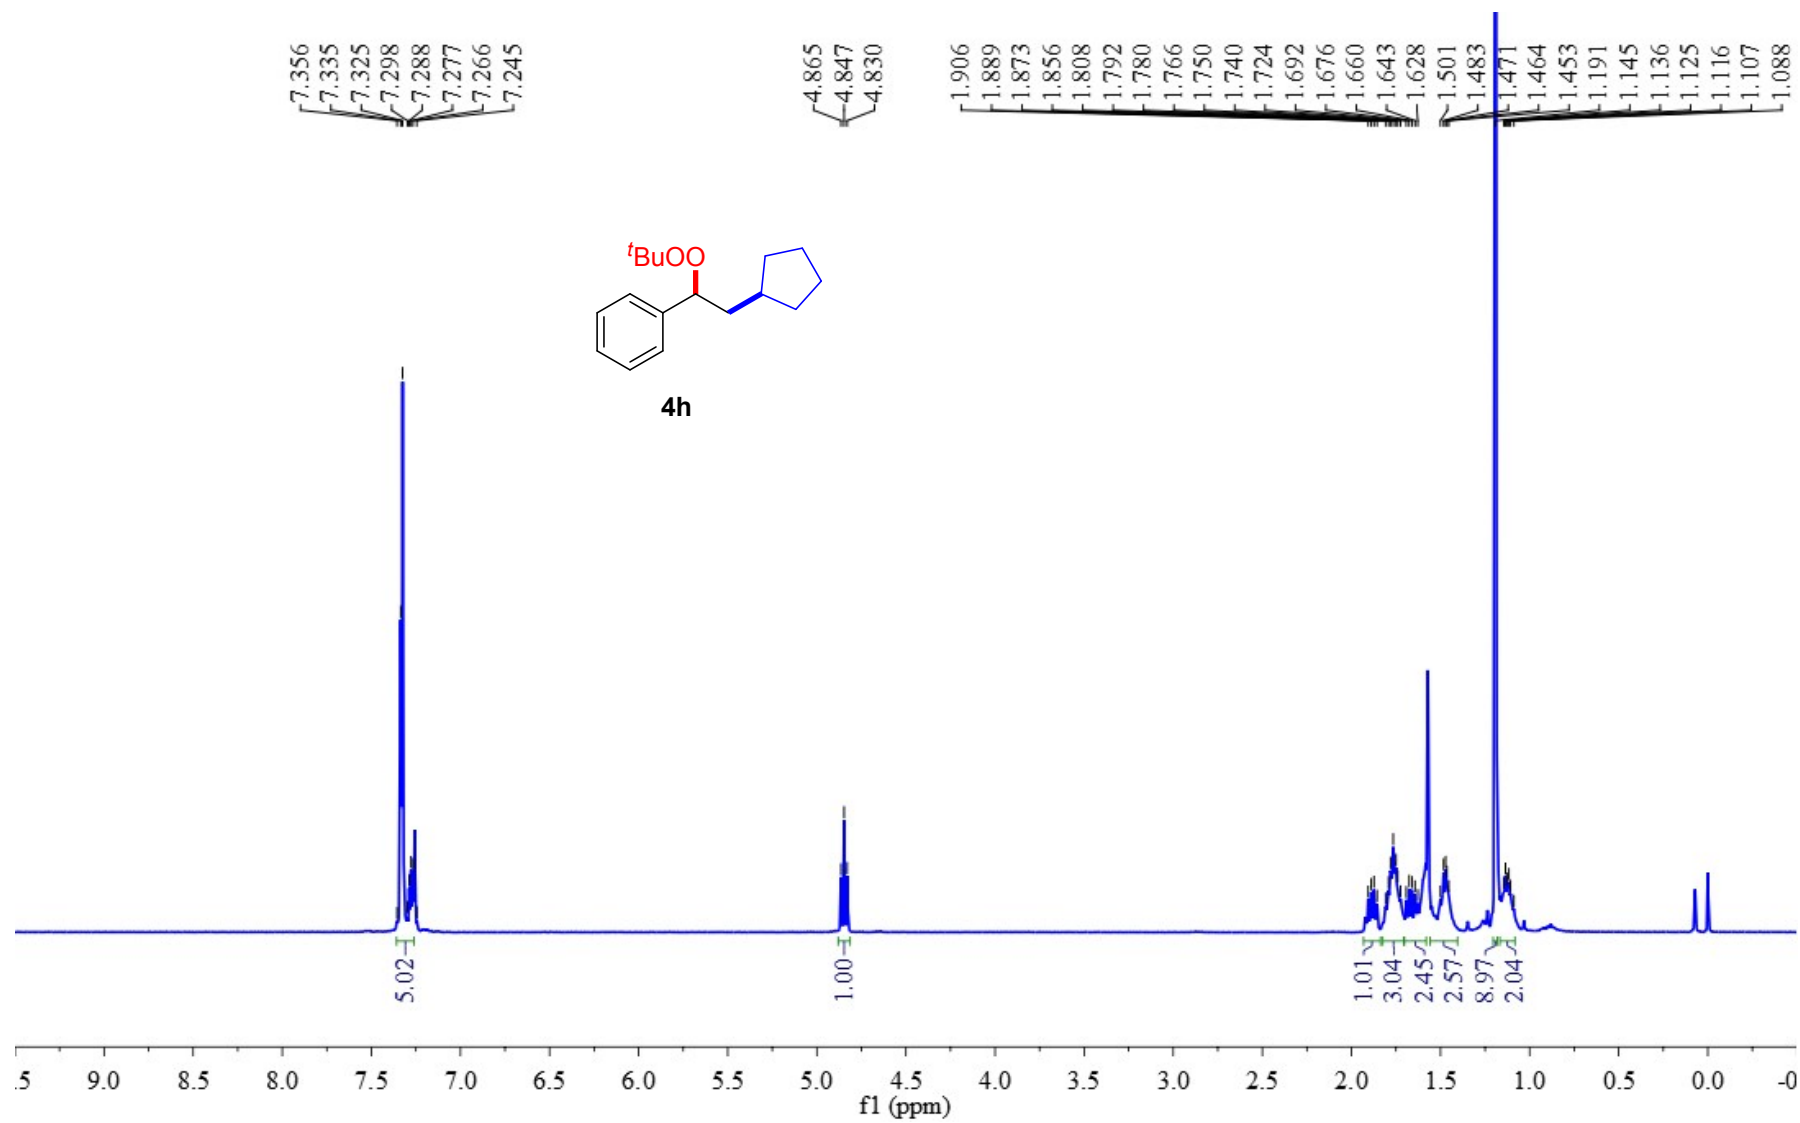

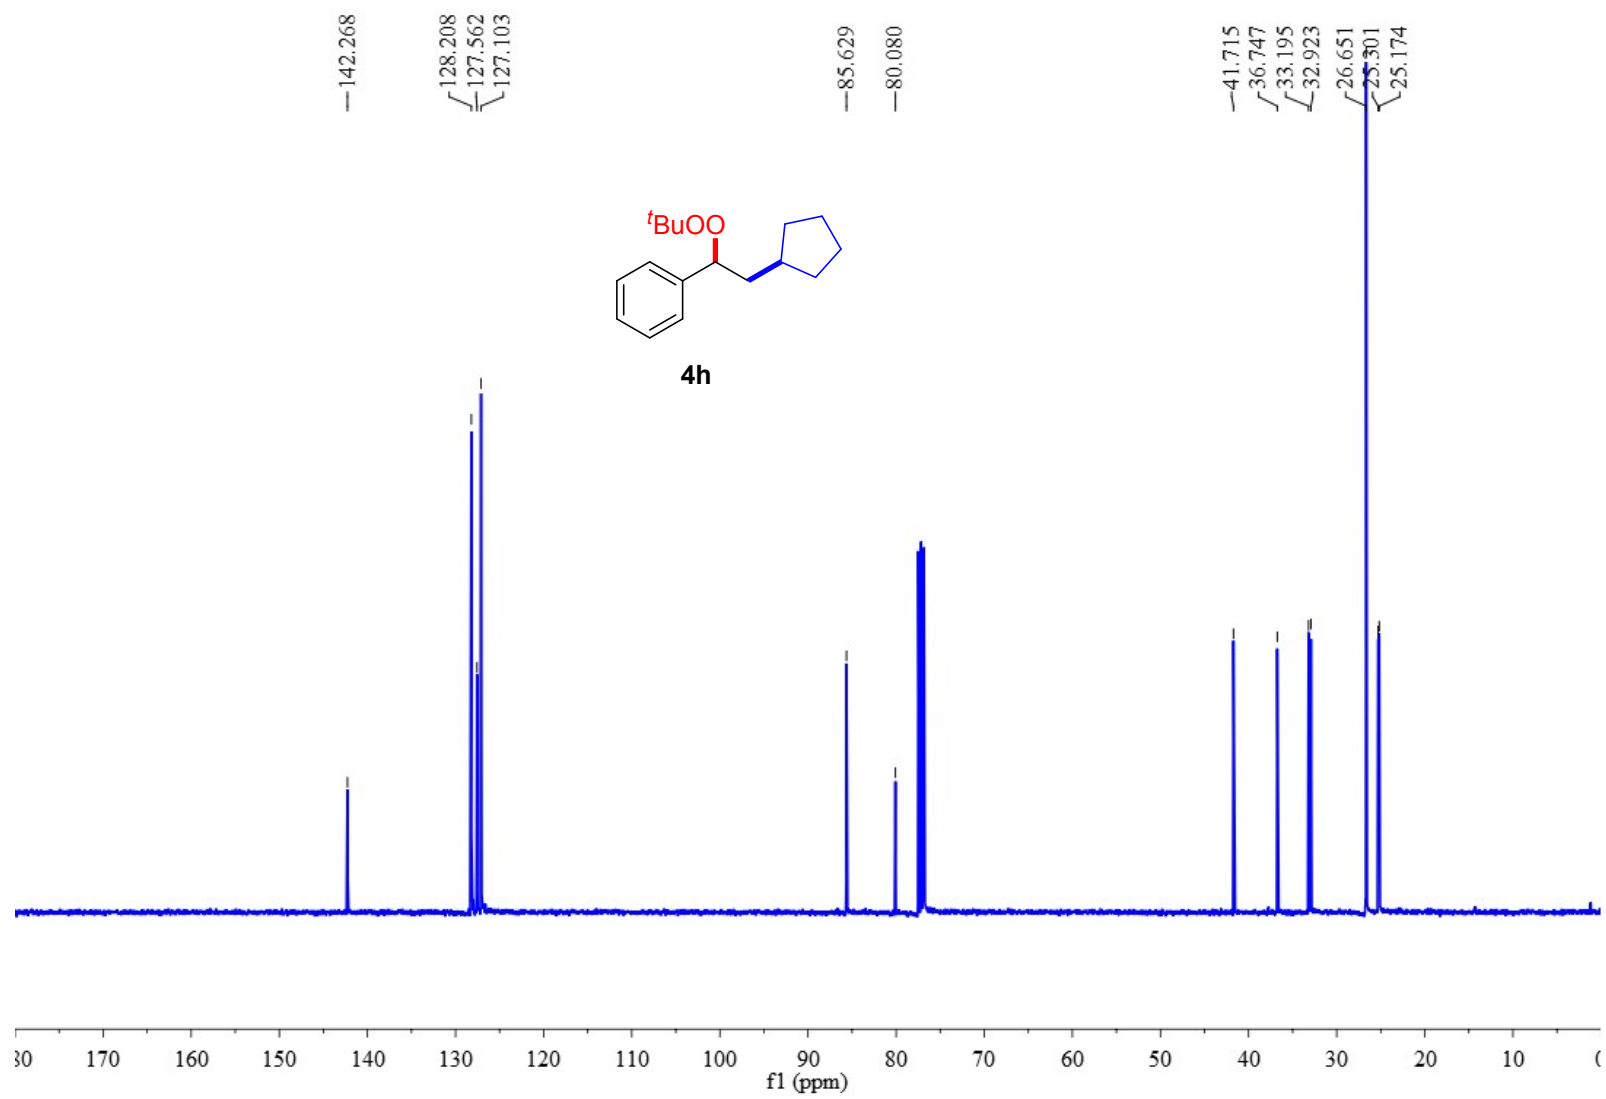

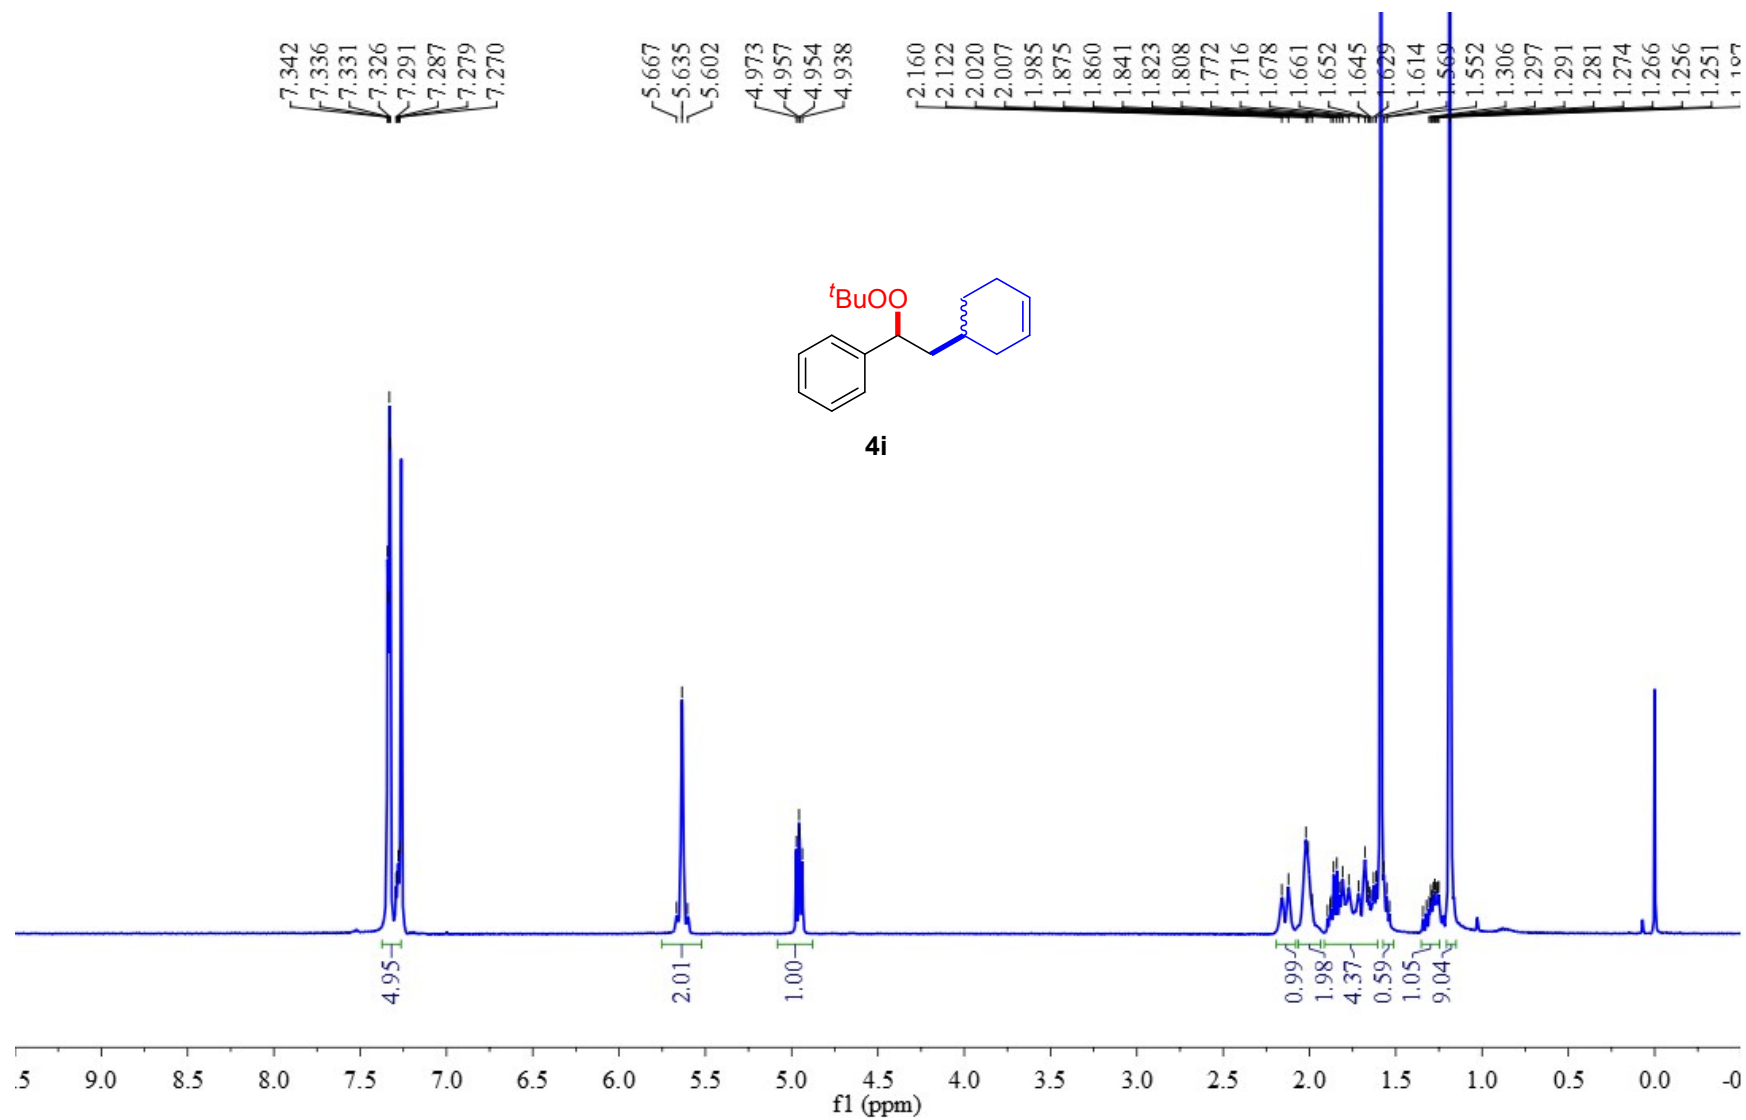

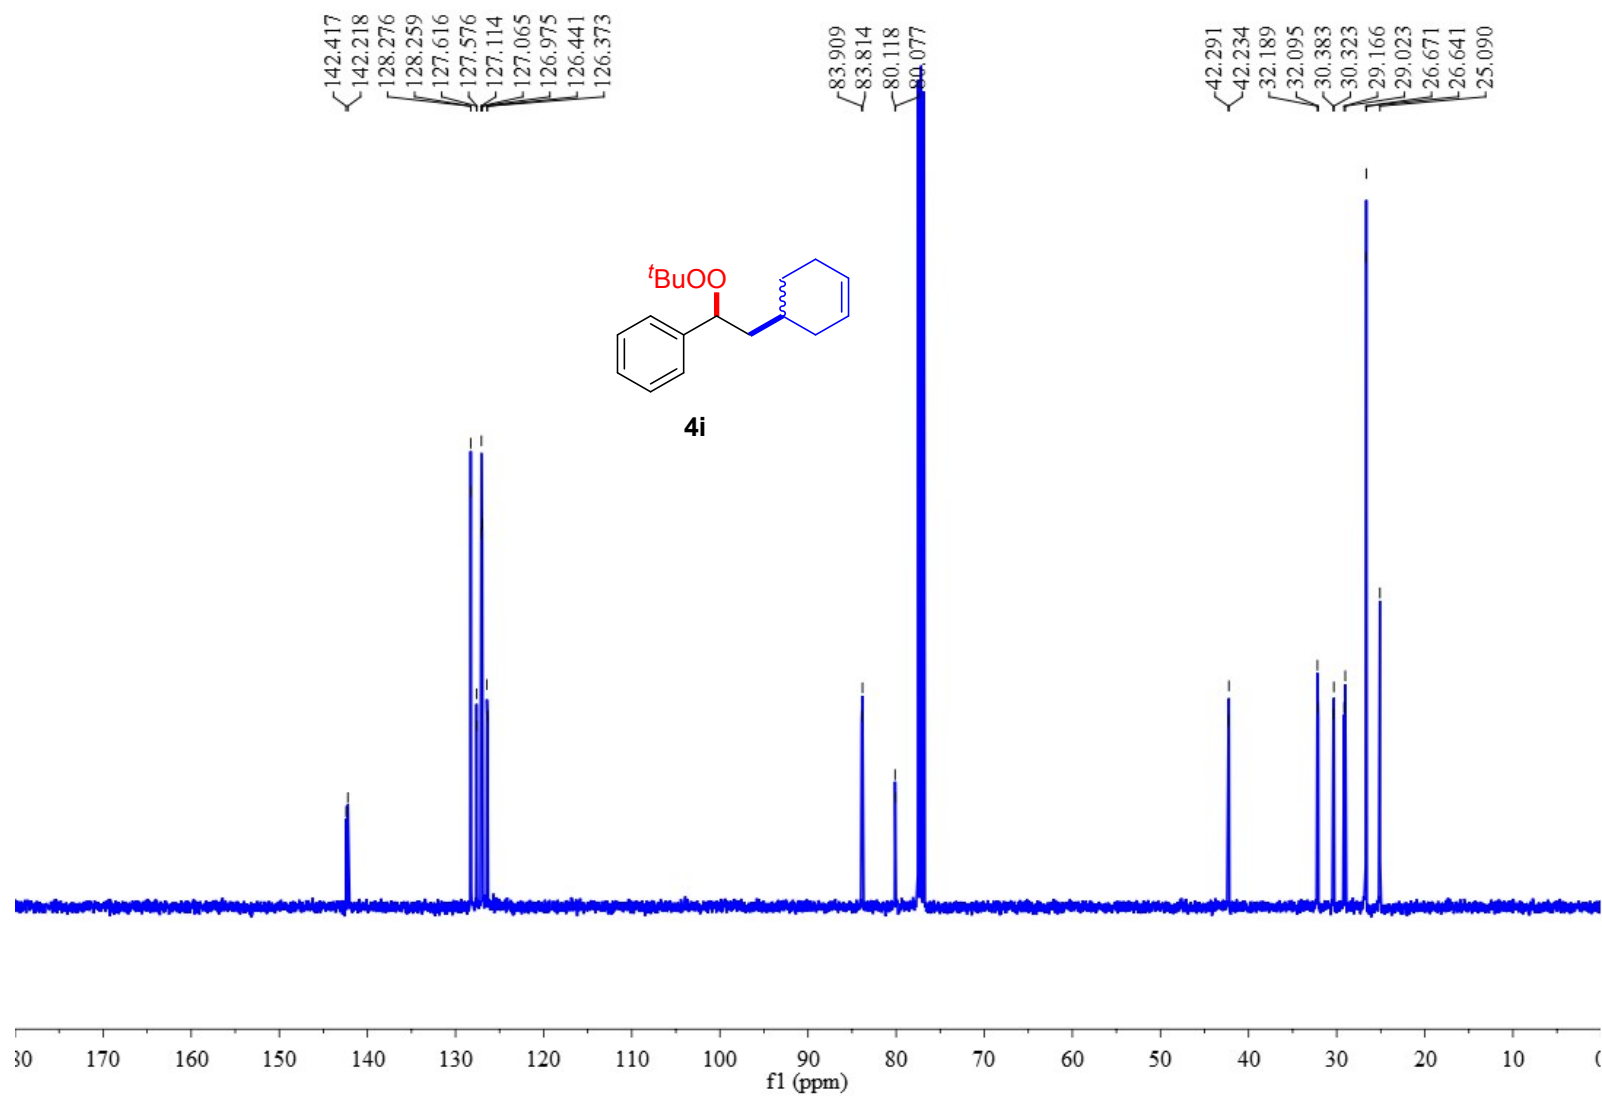

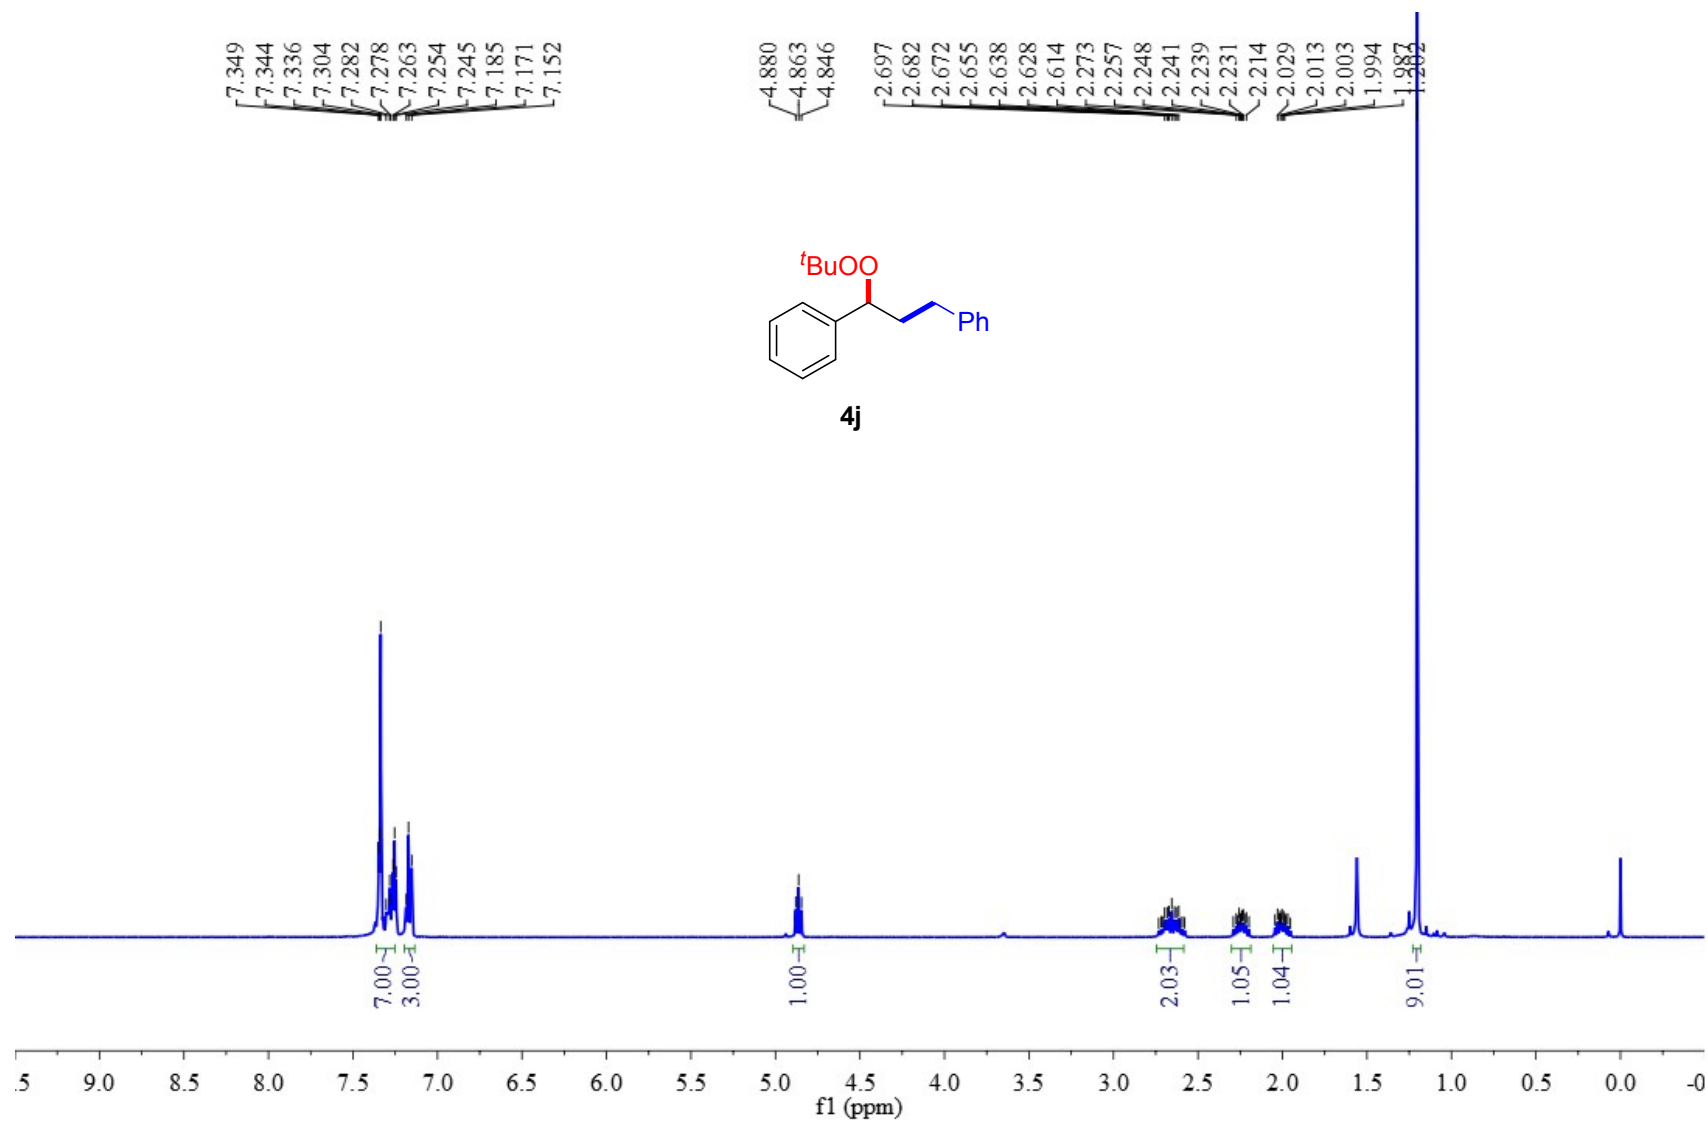

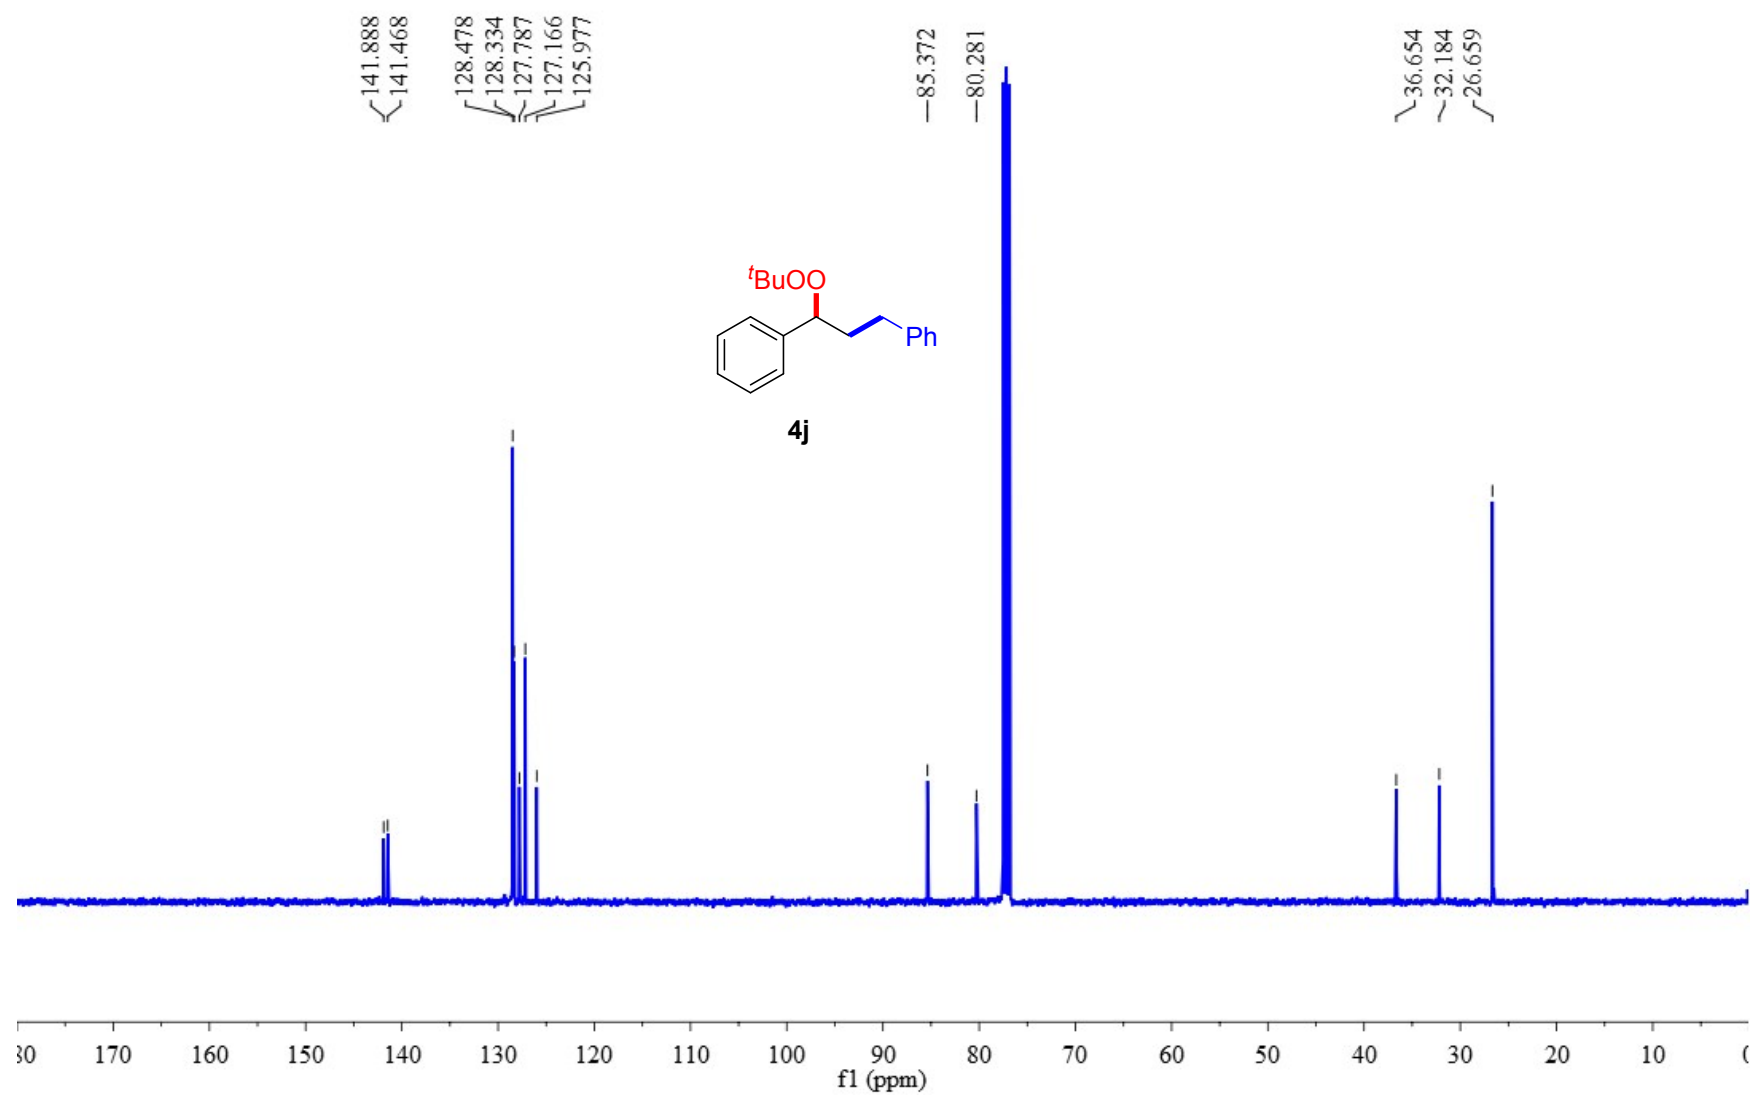

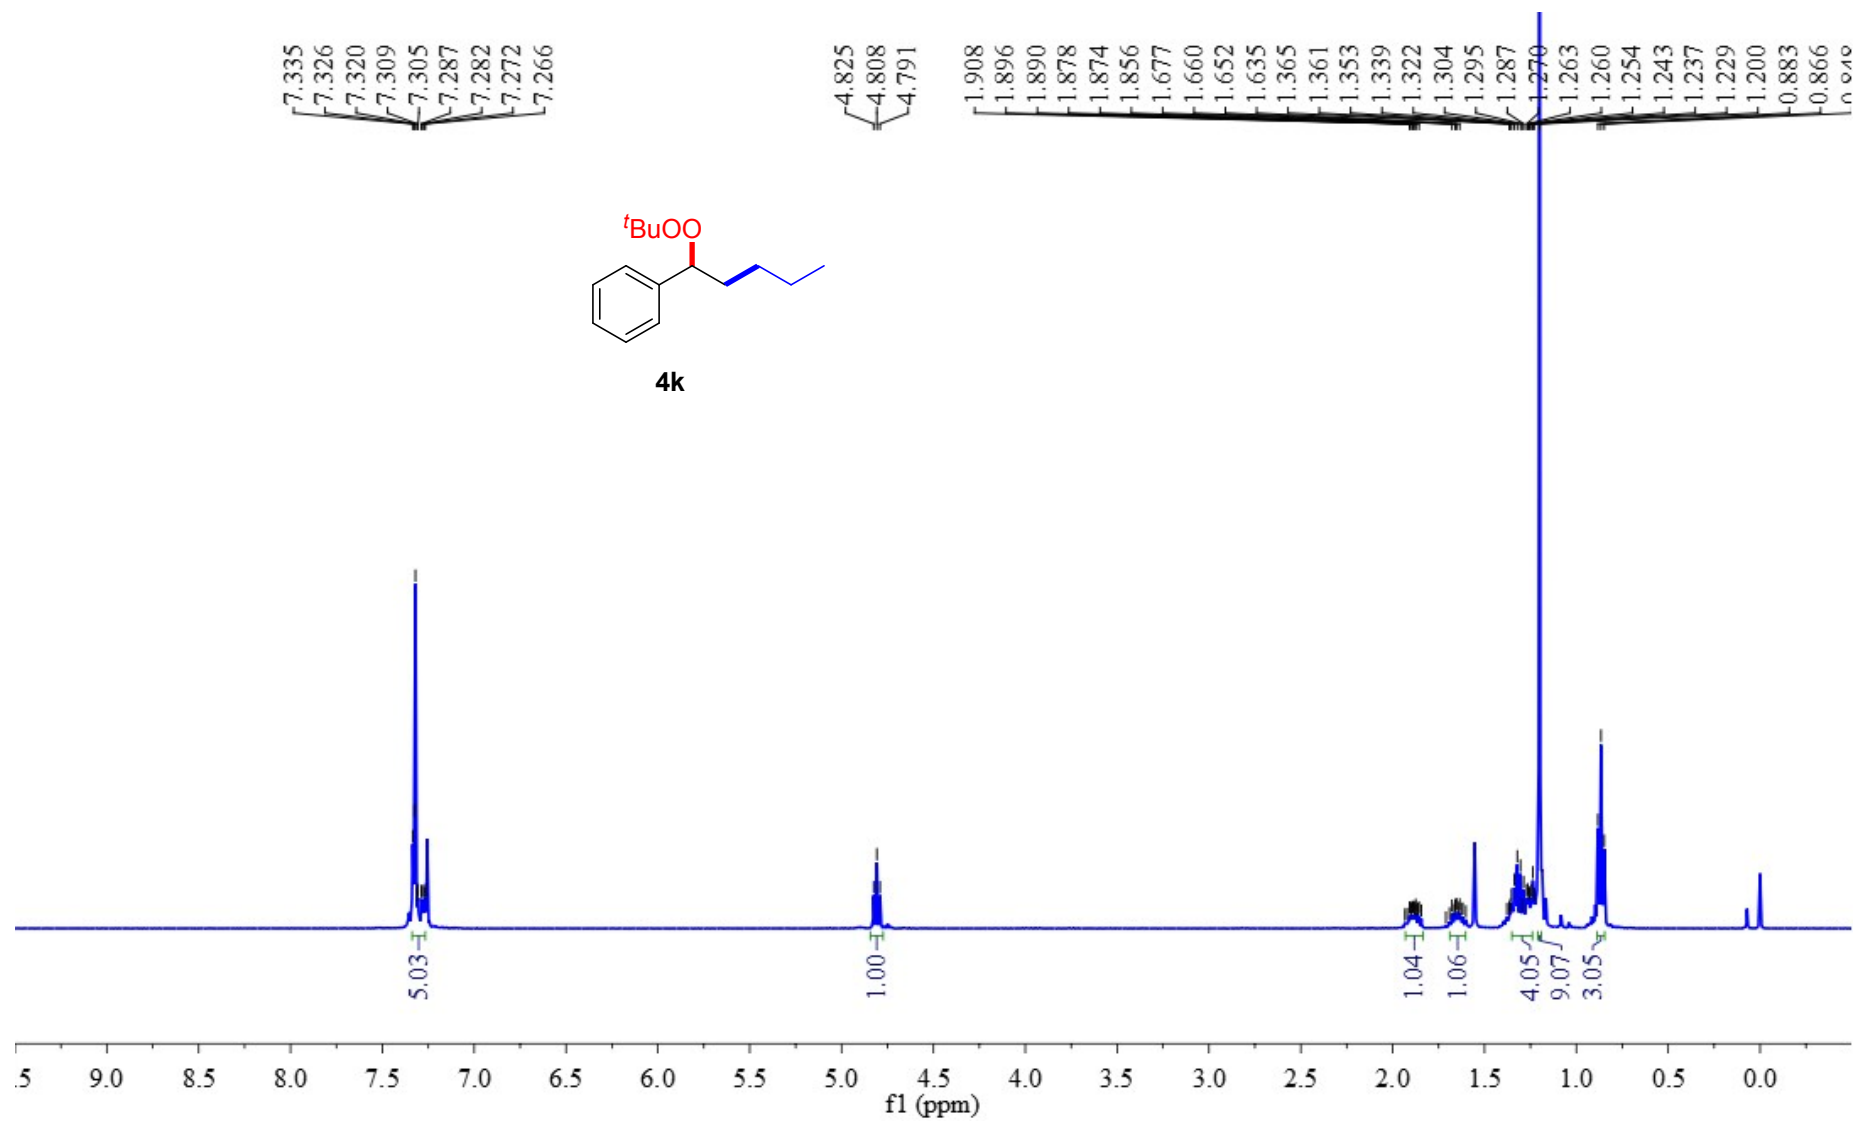

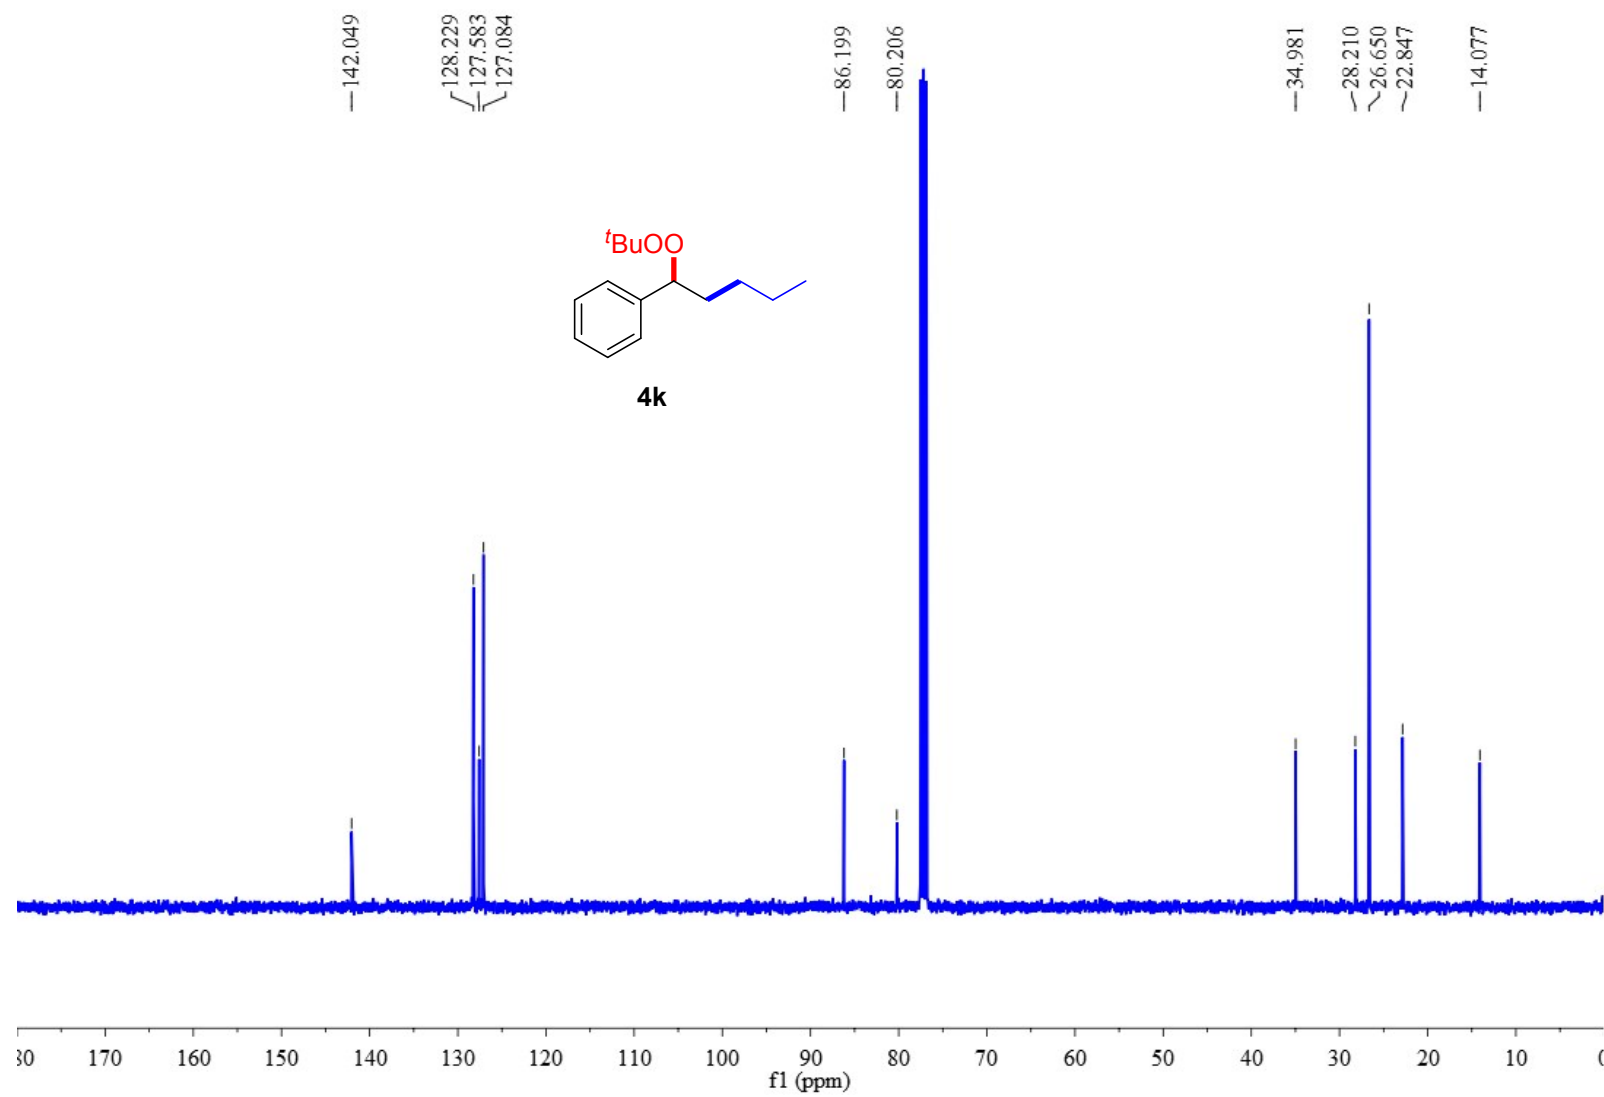



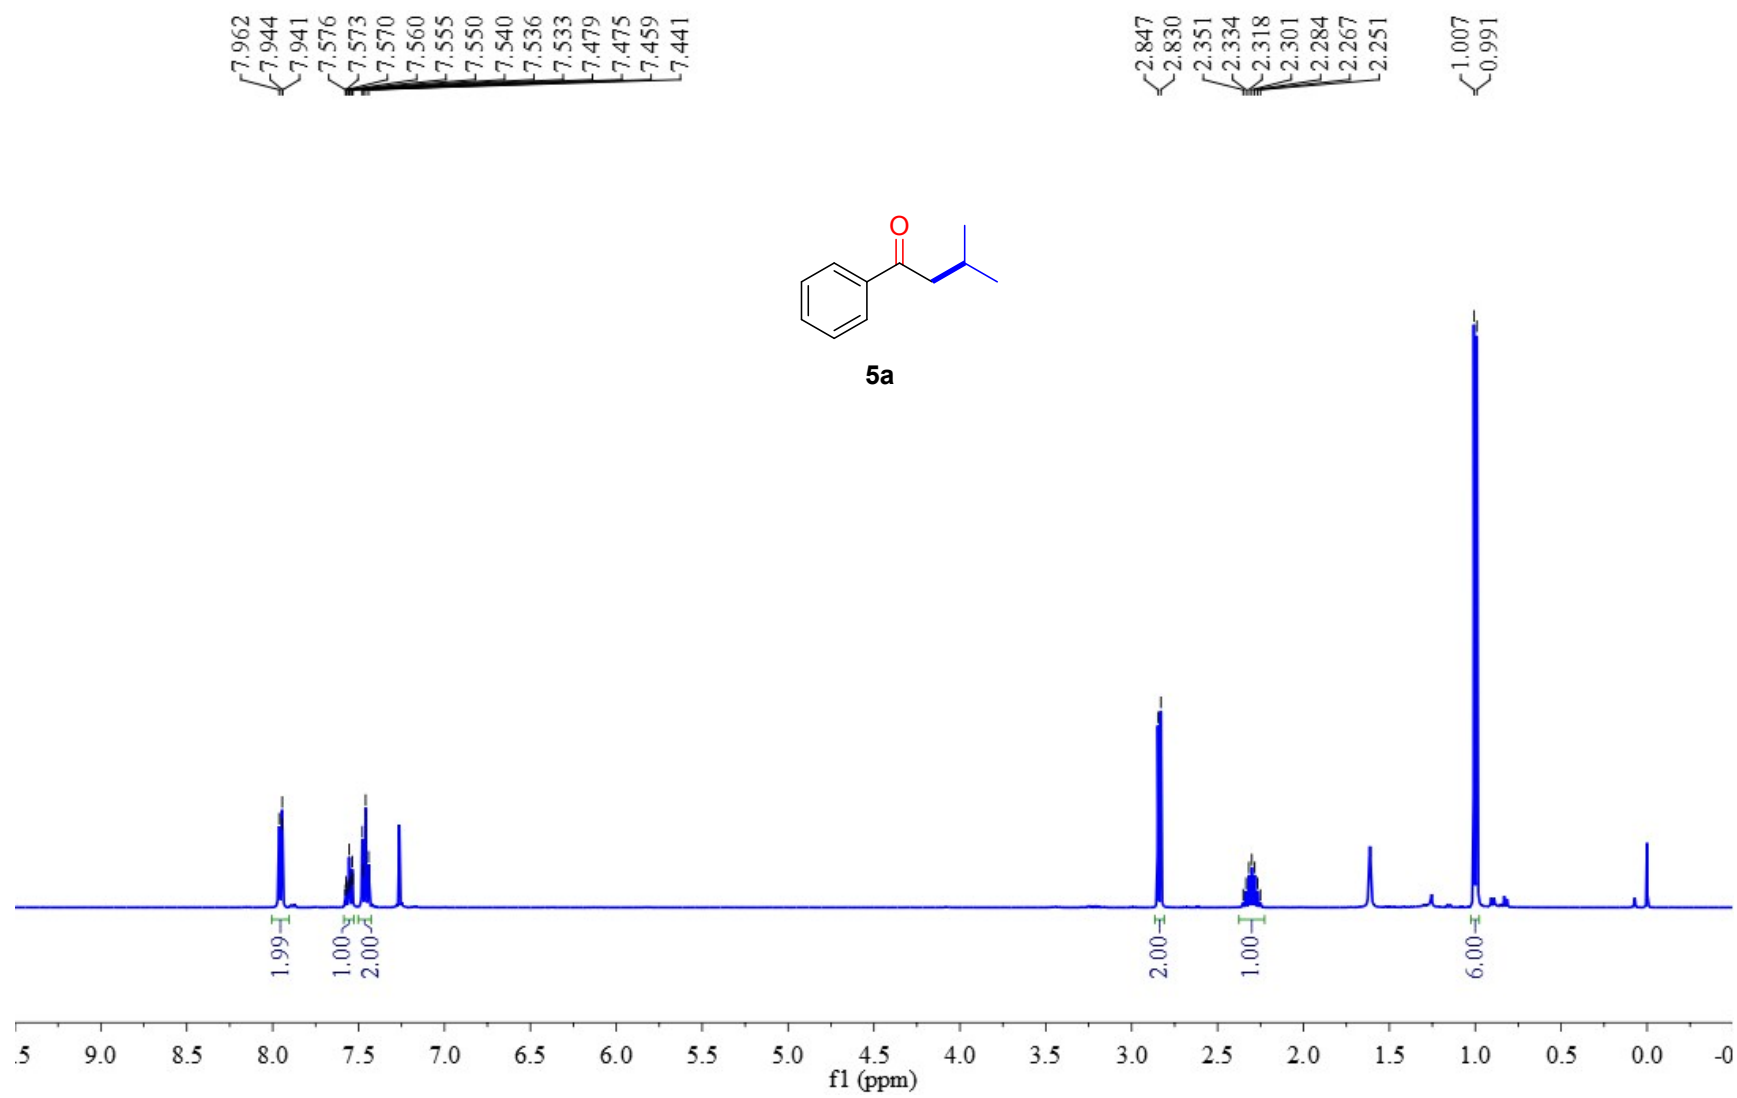

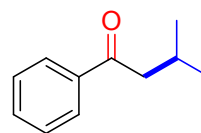

**5a**

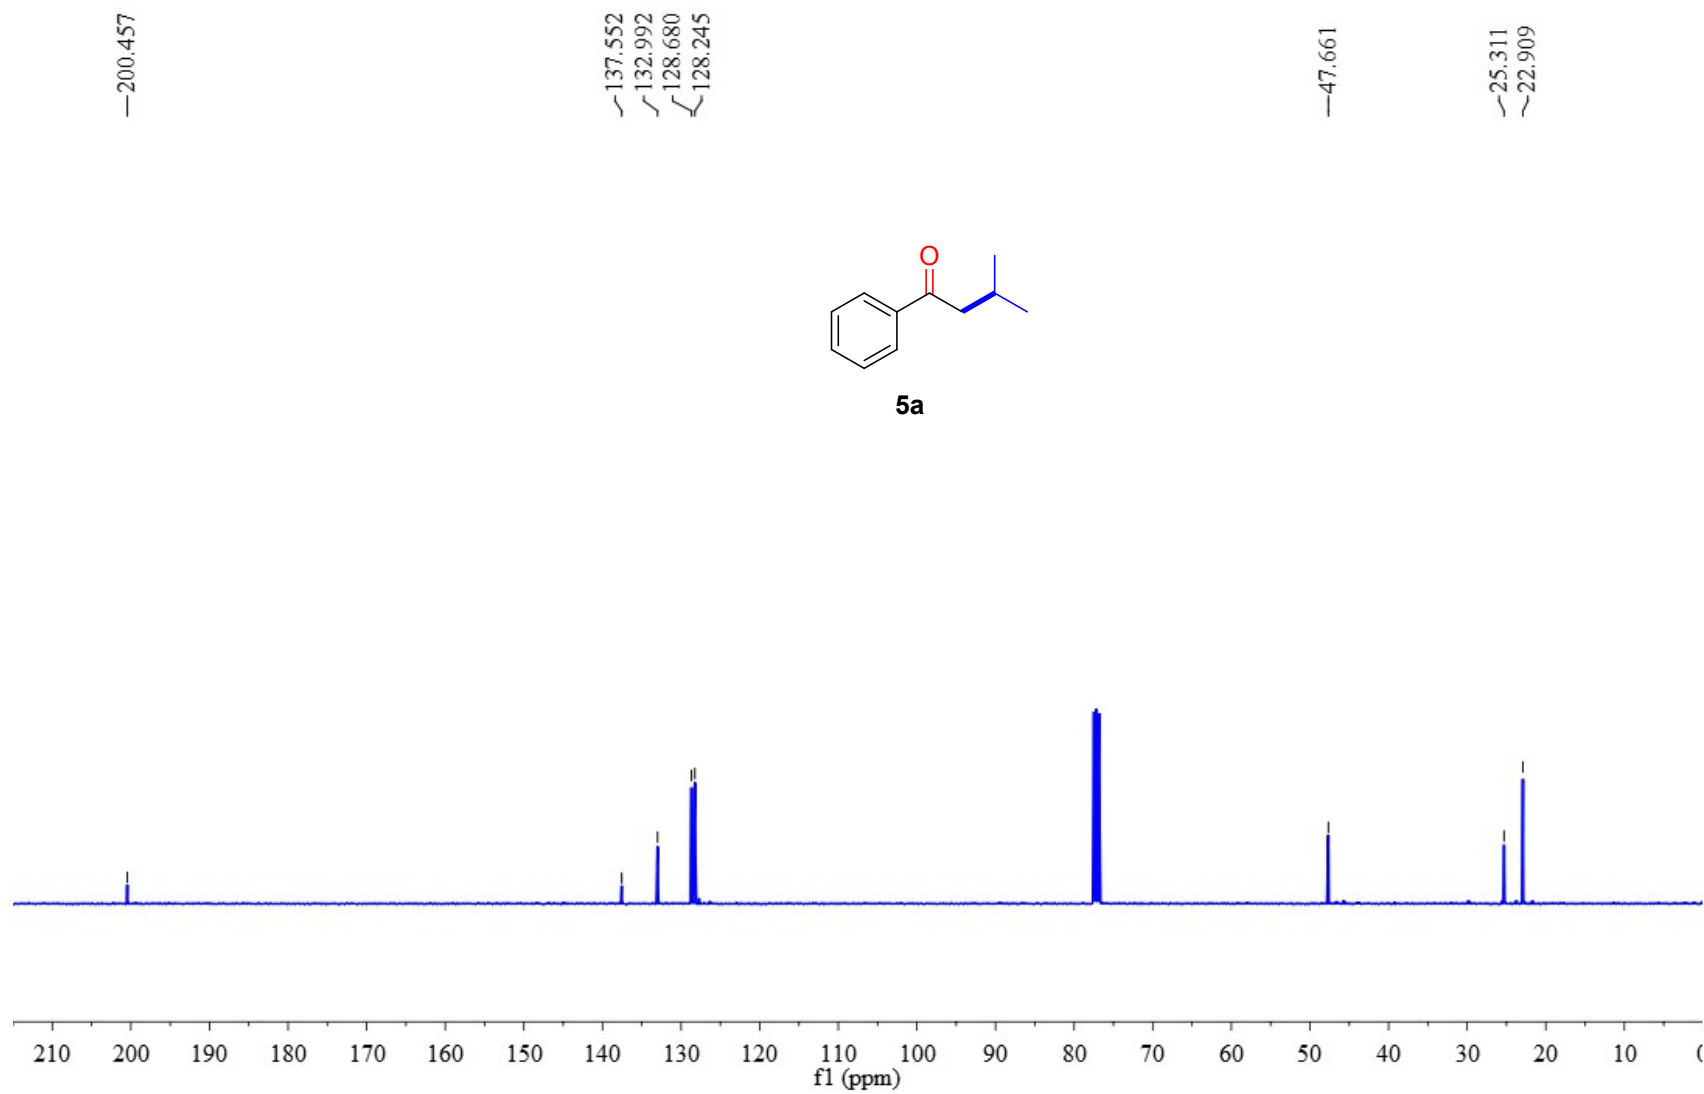

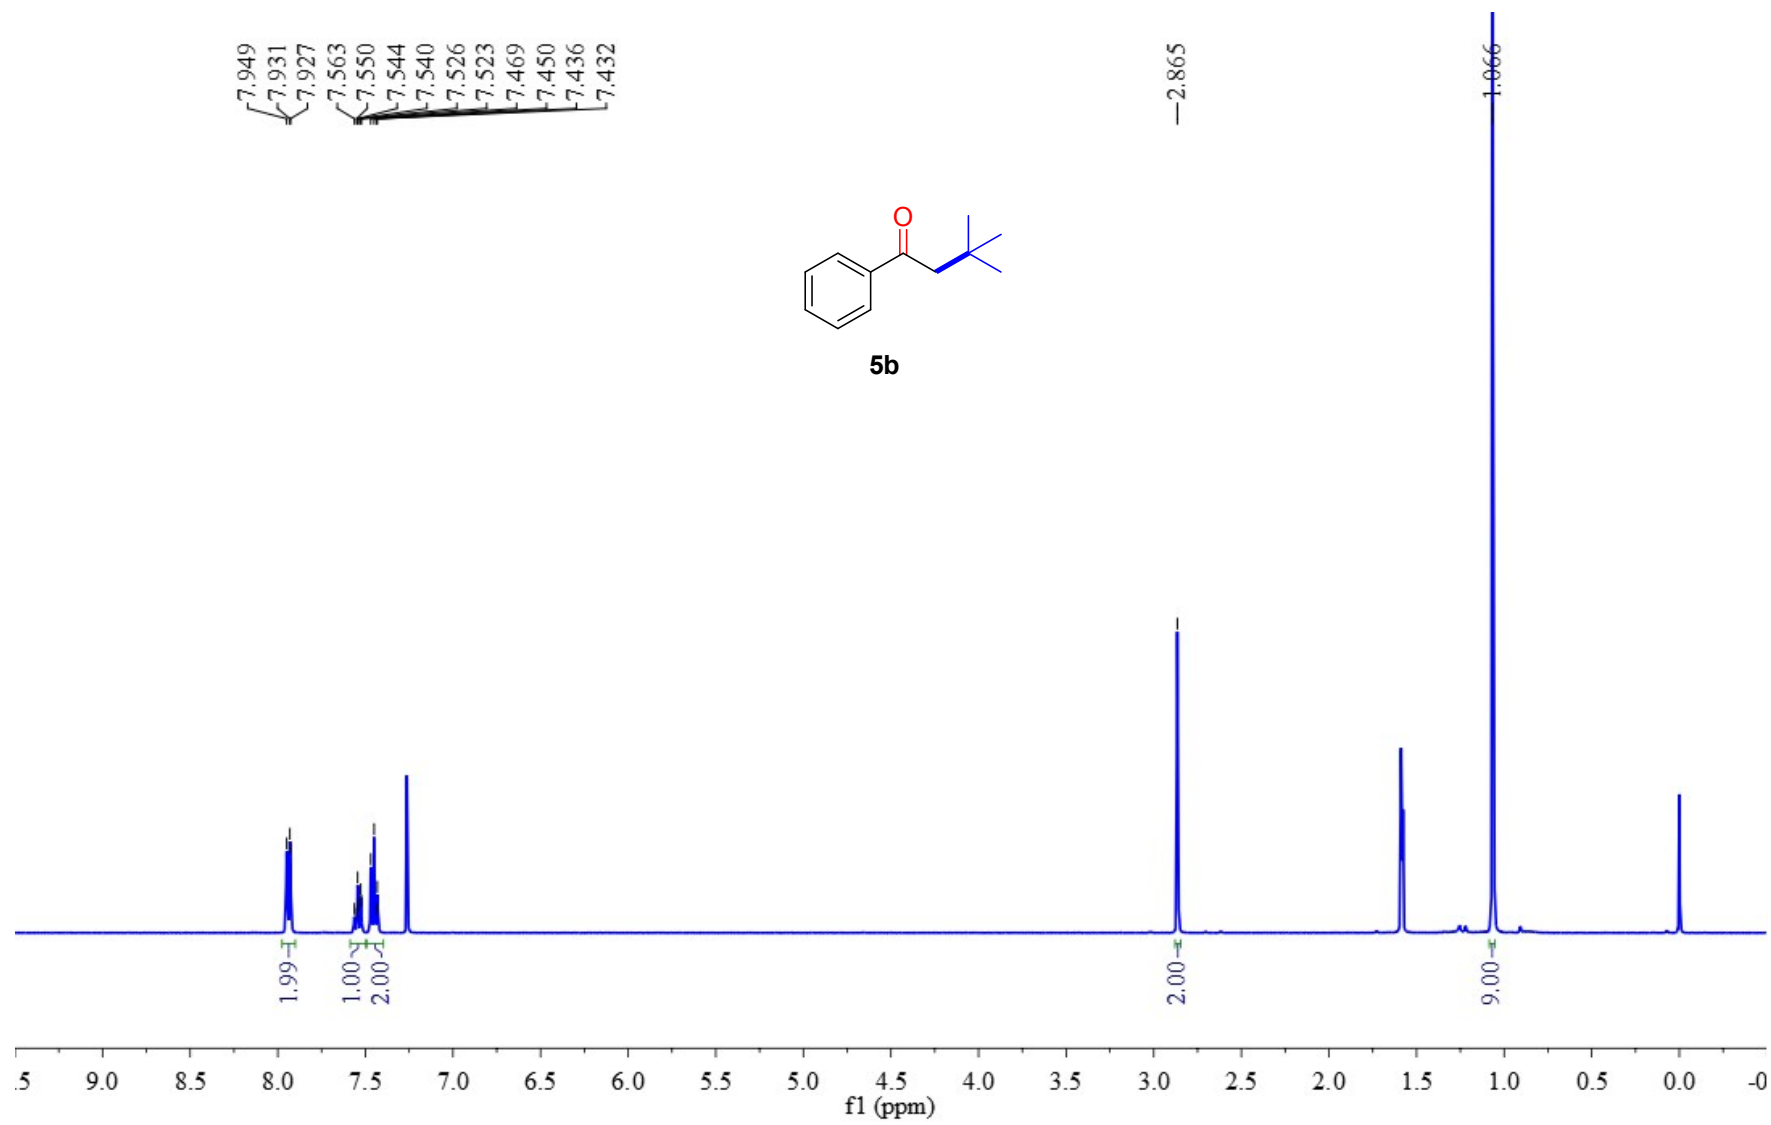

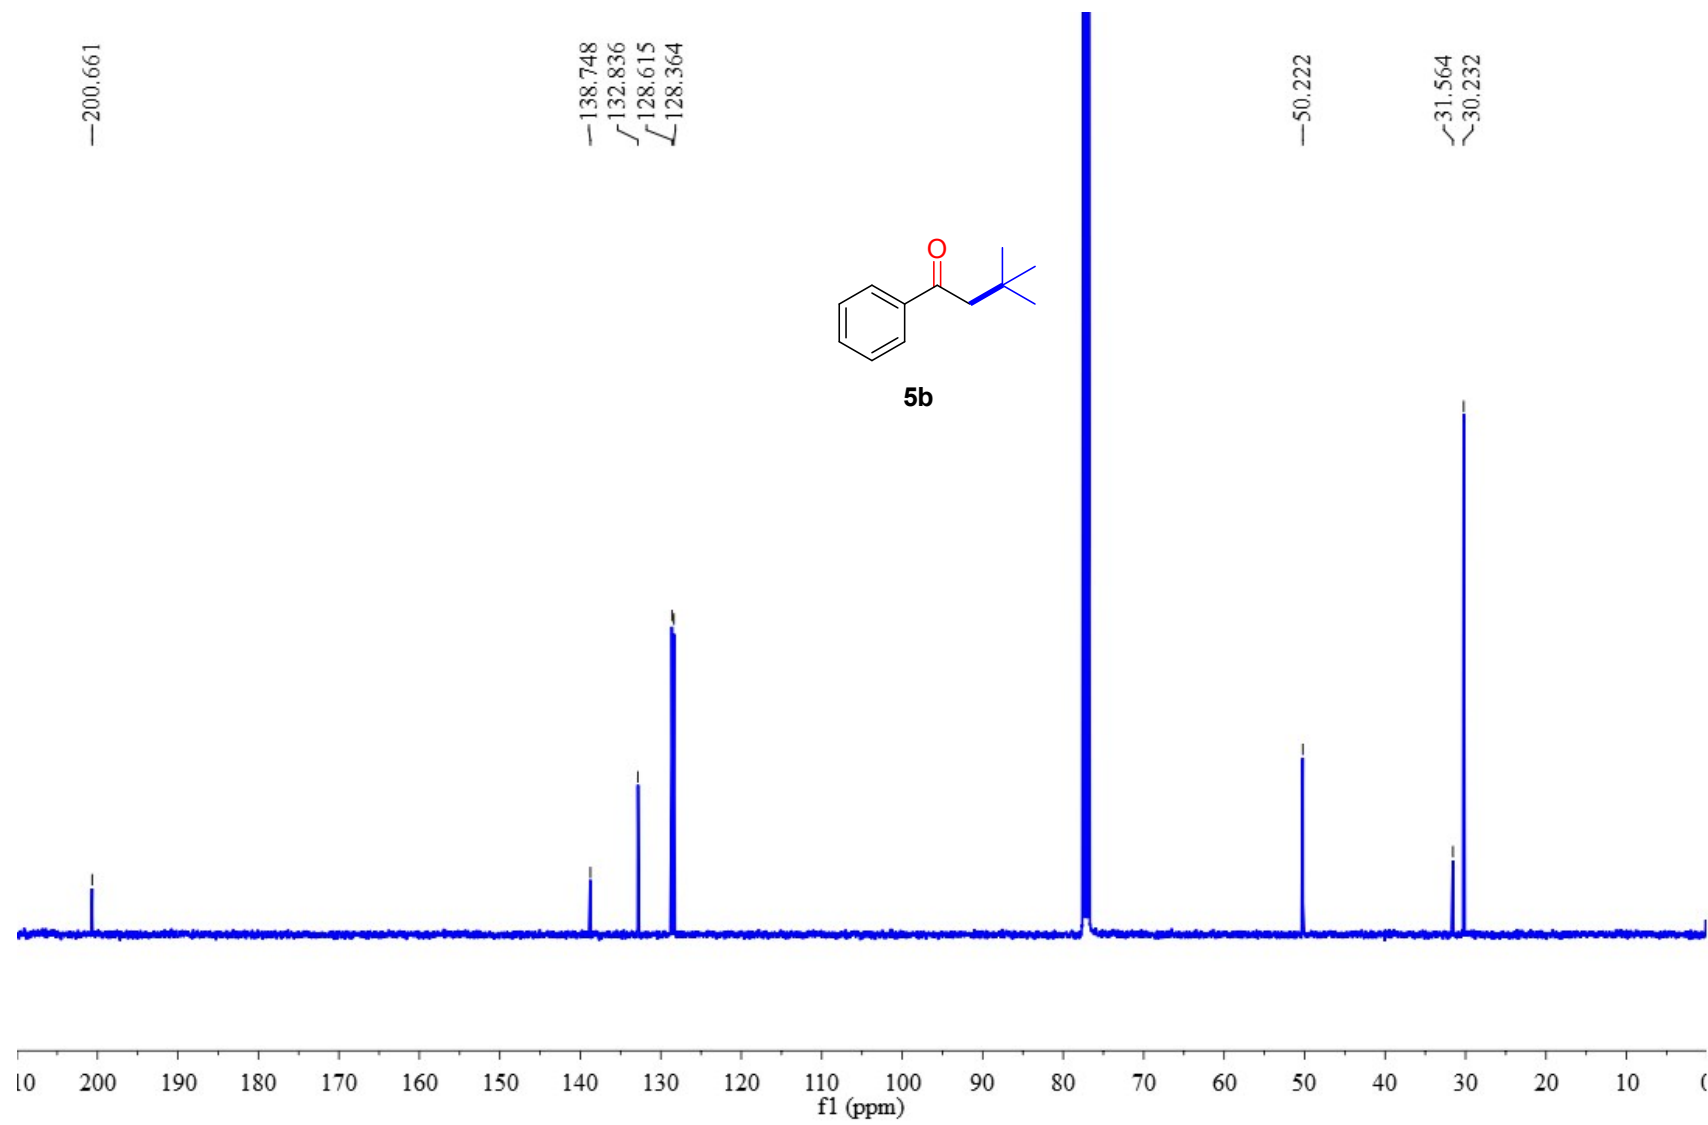

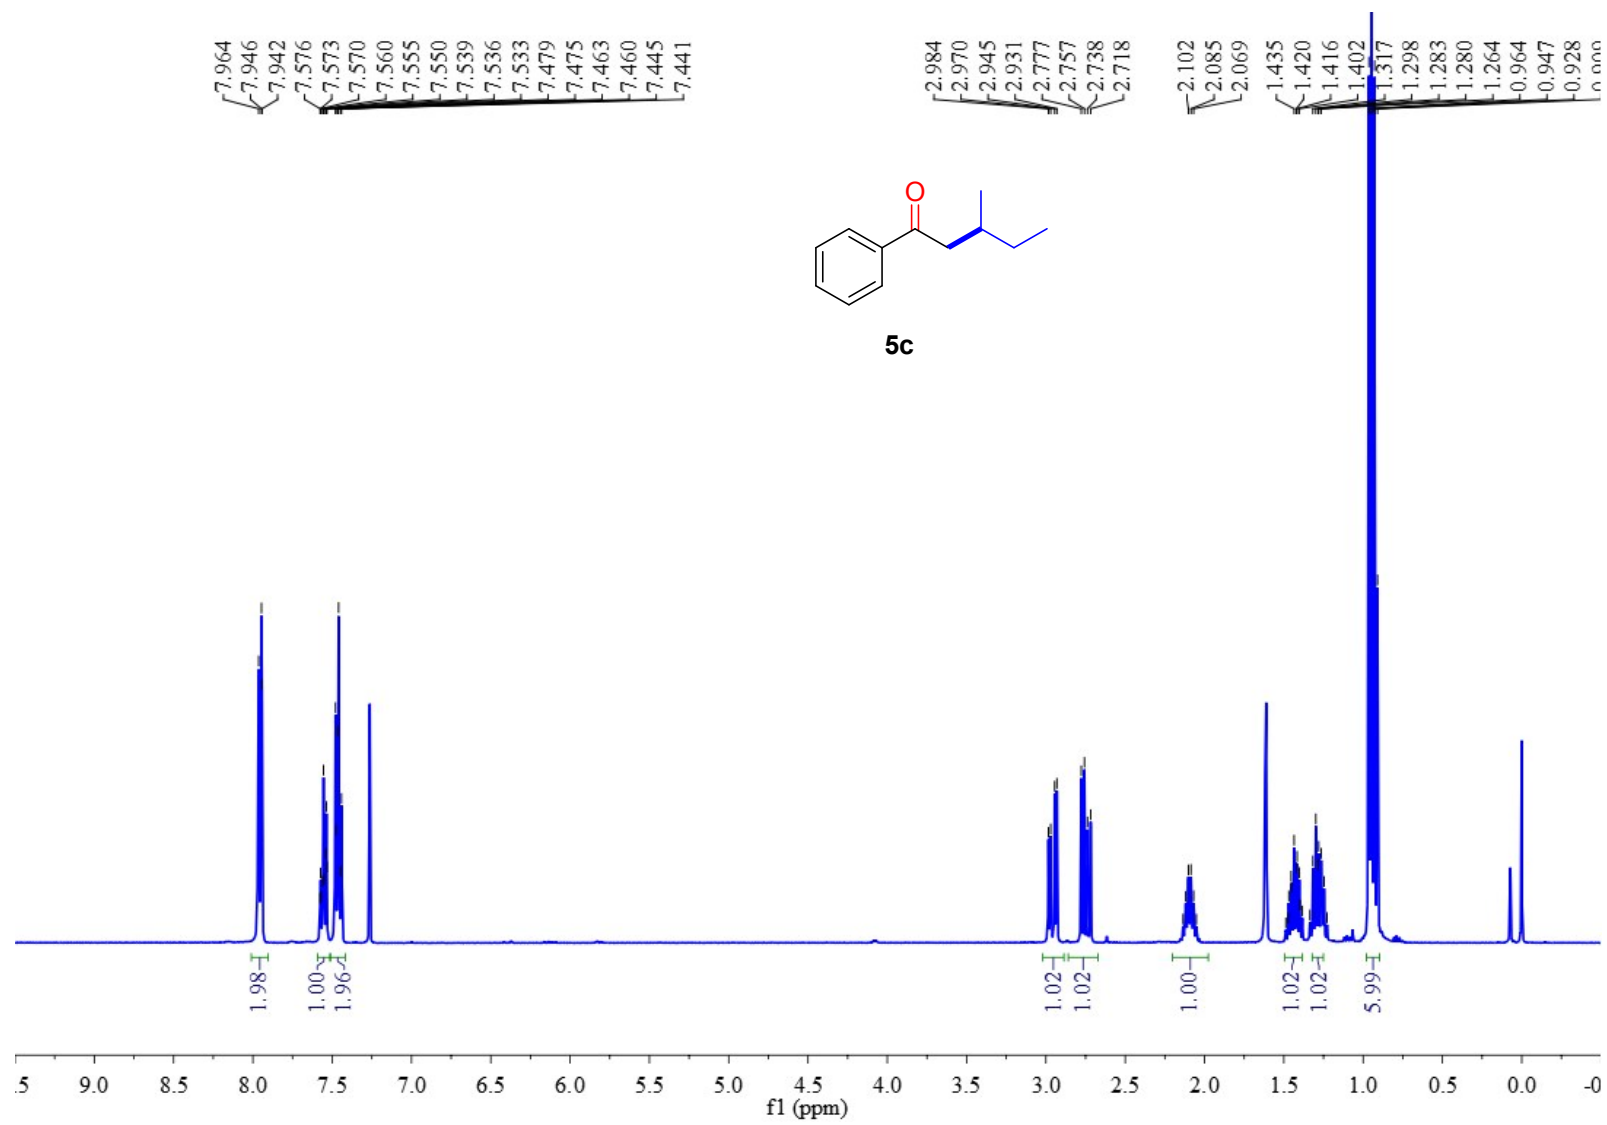

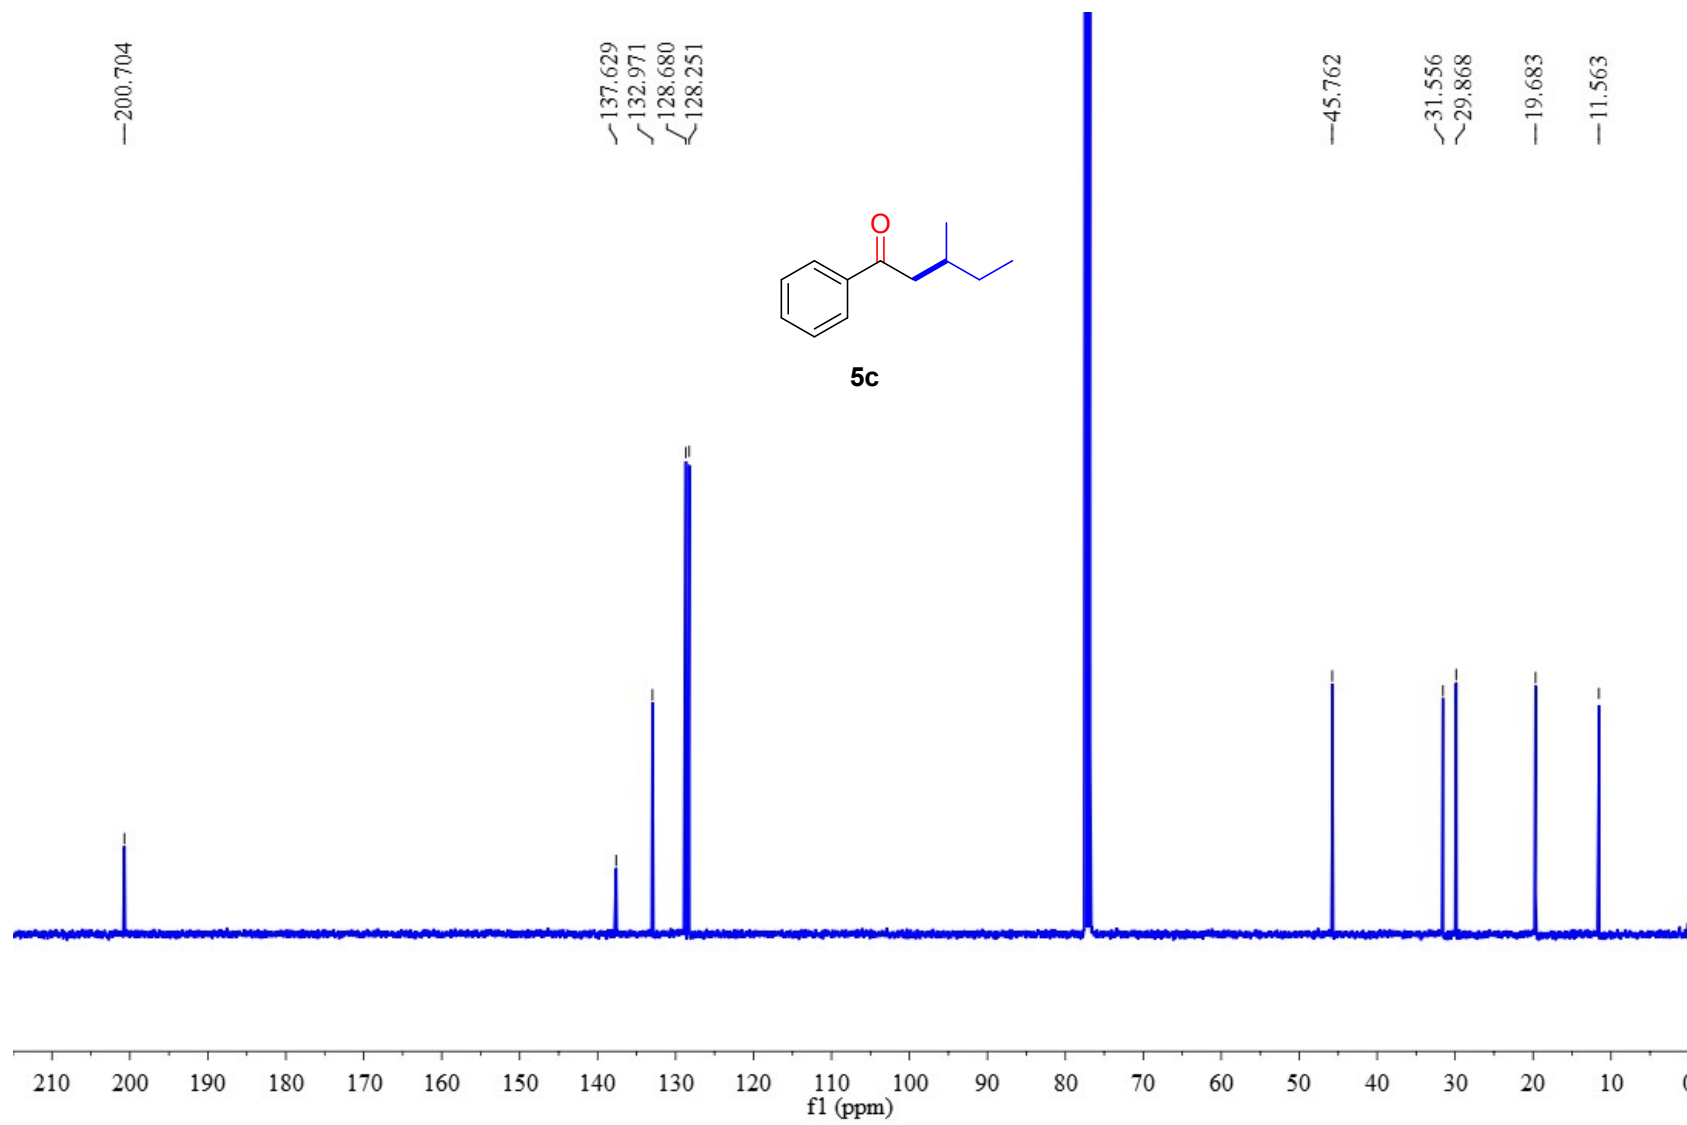

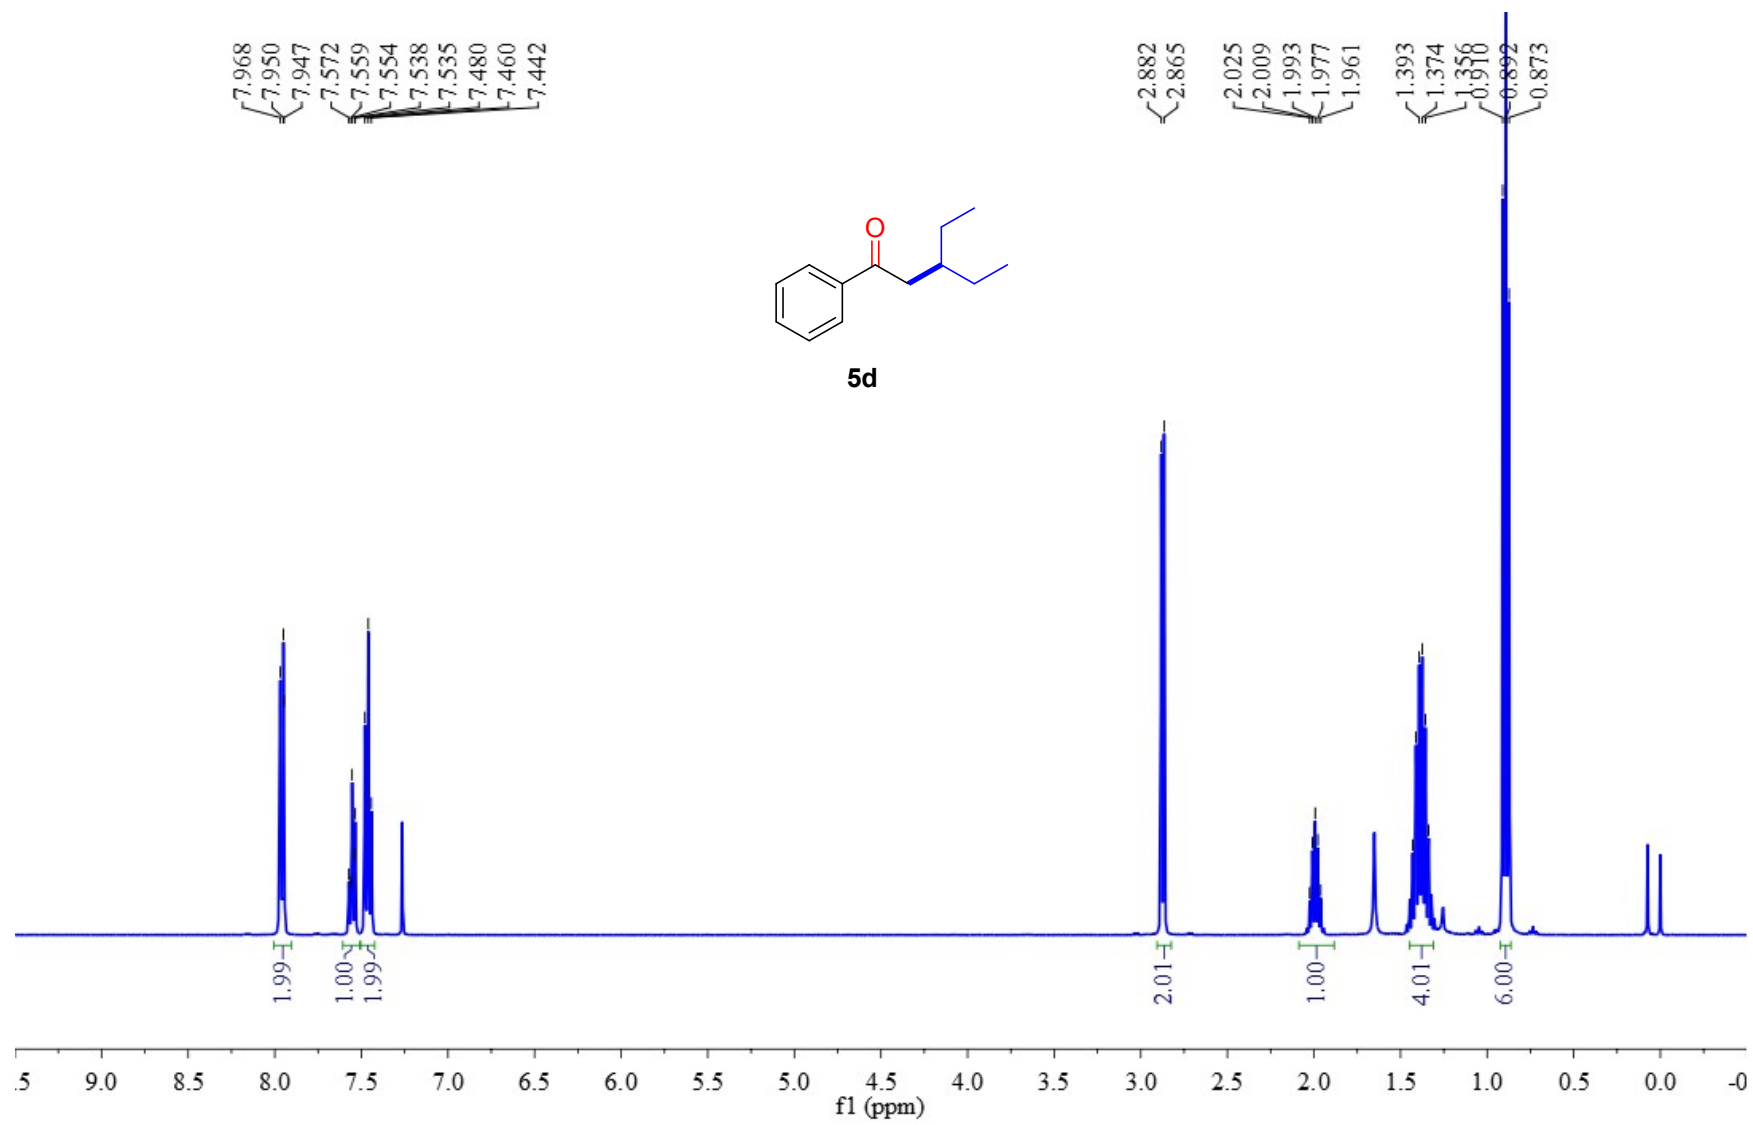

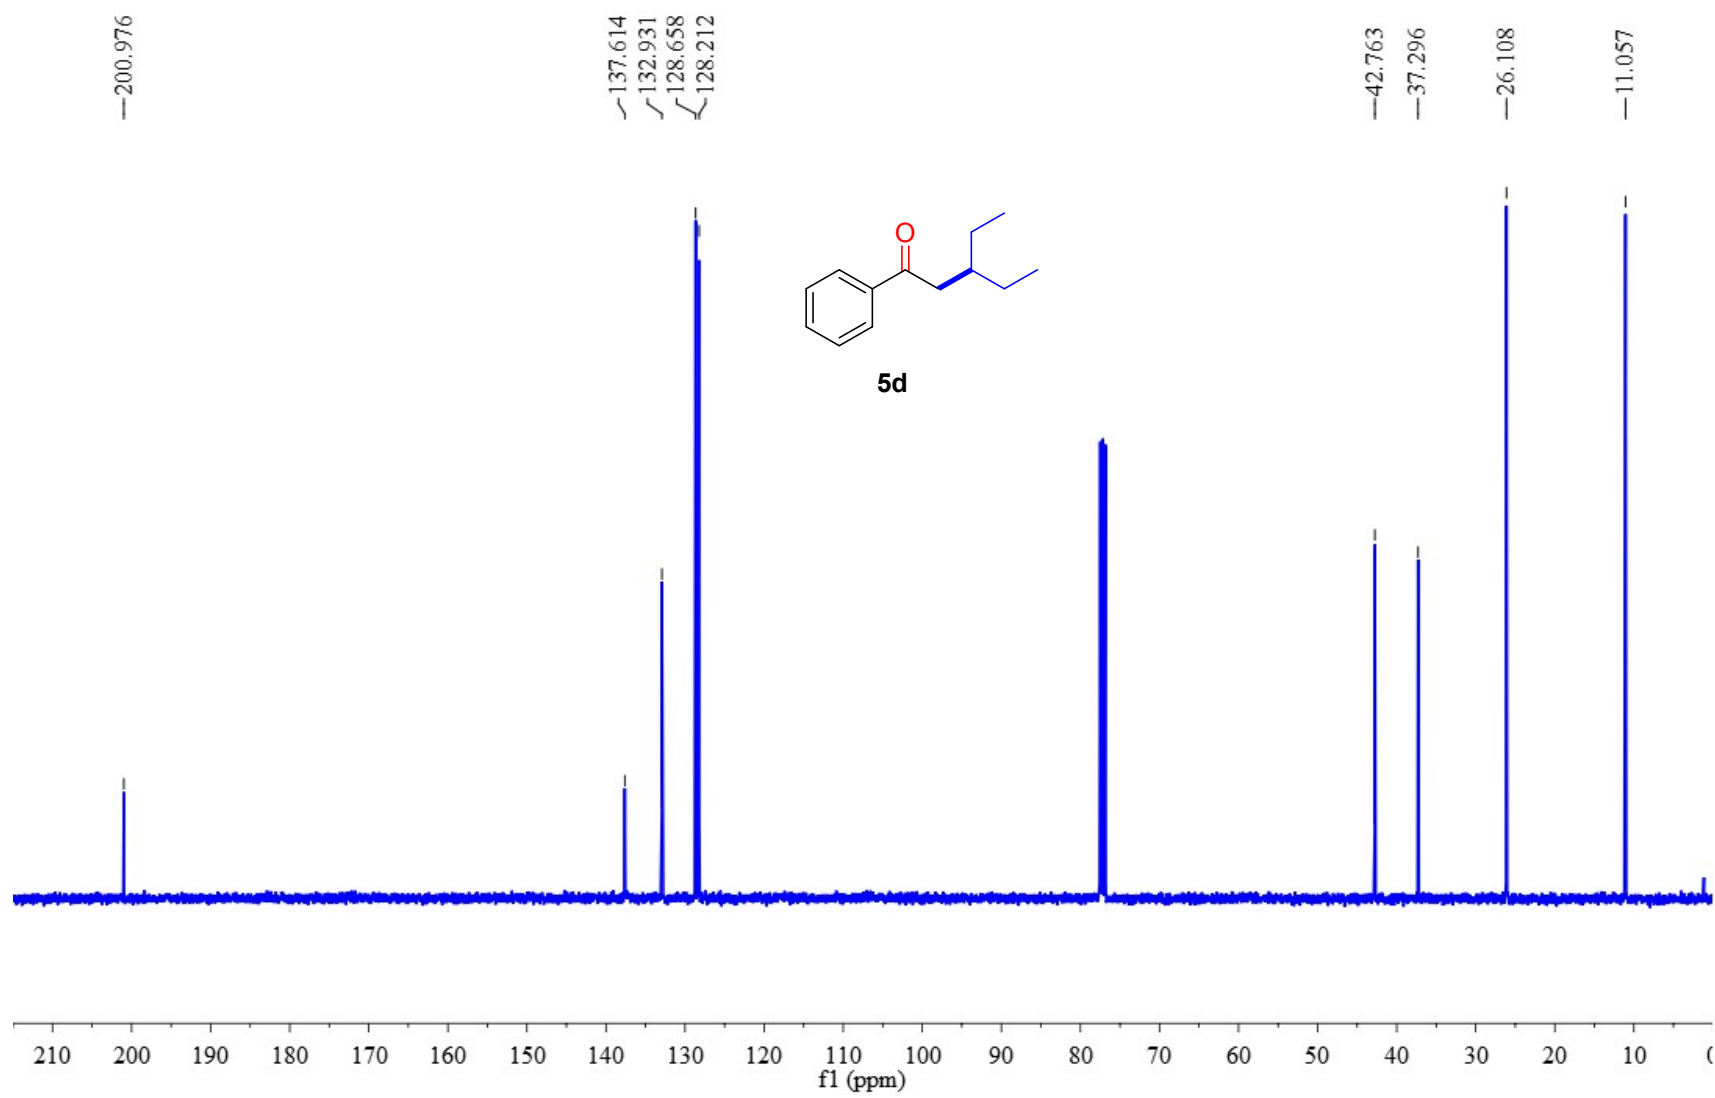



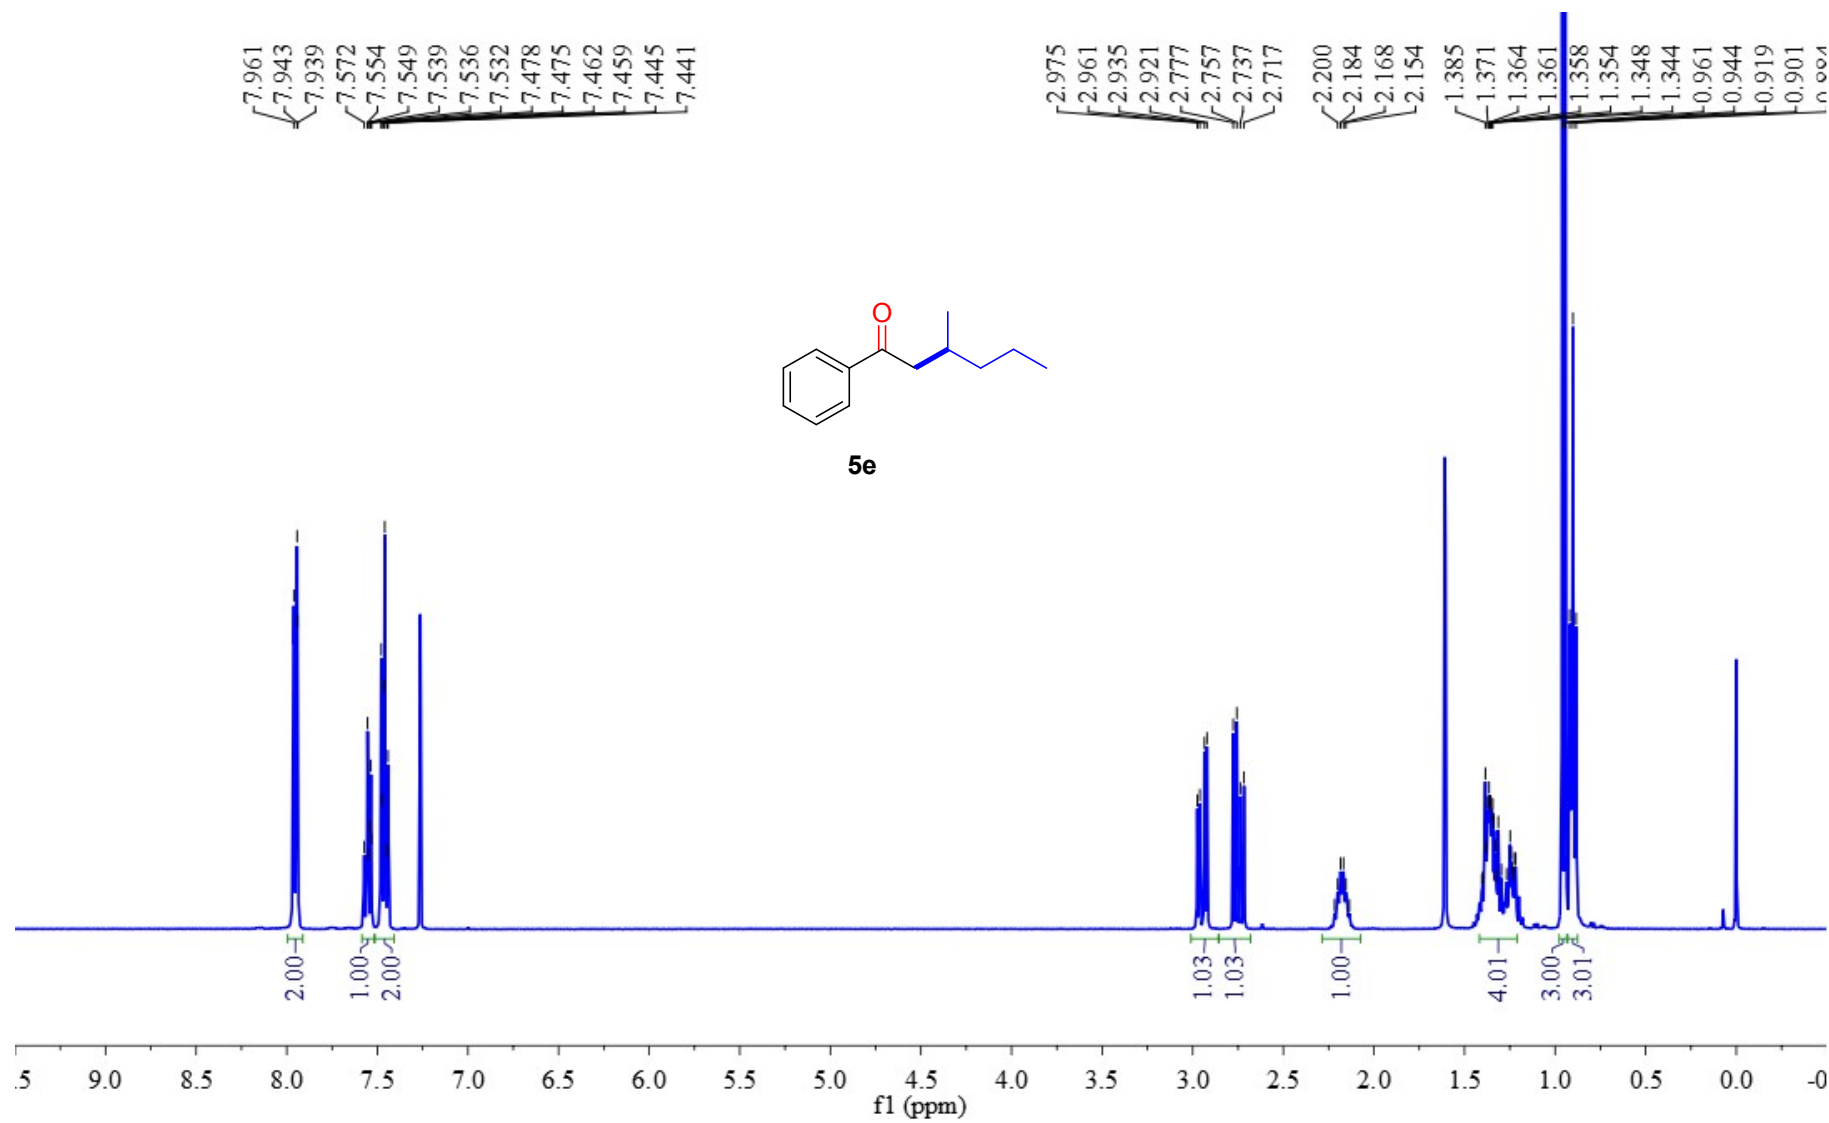

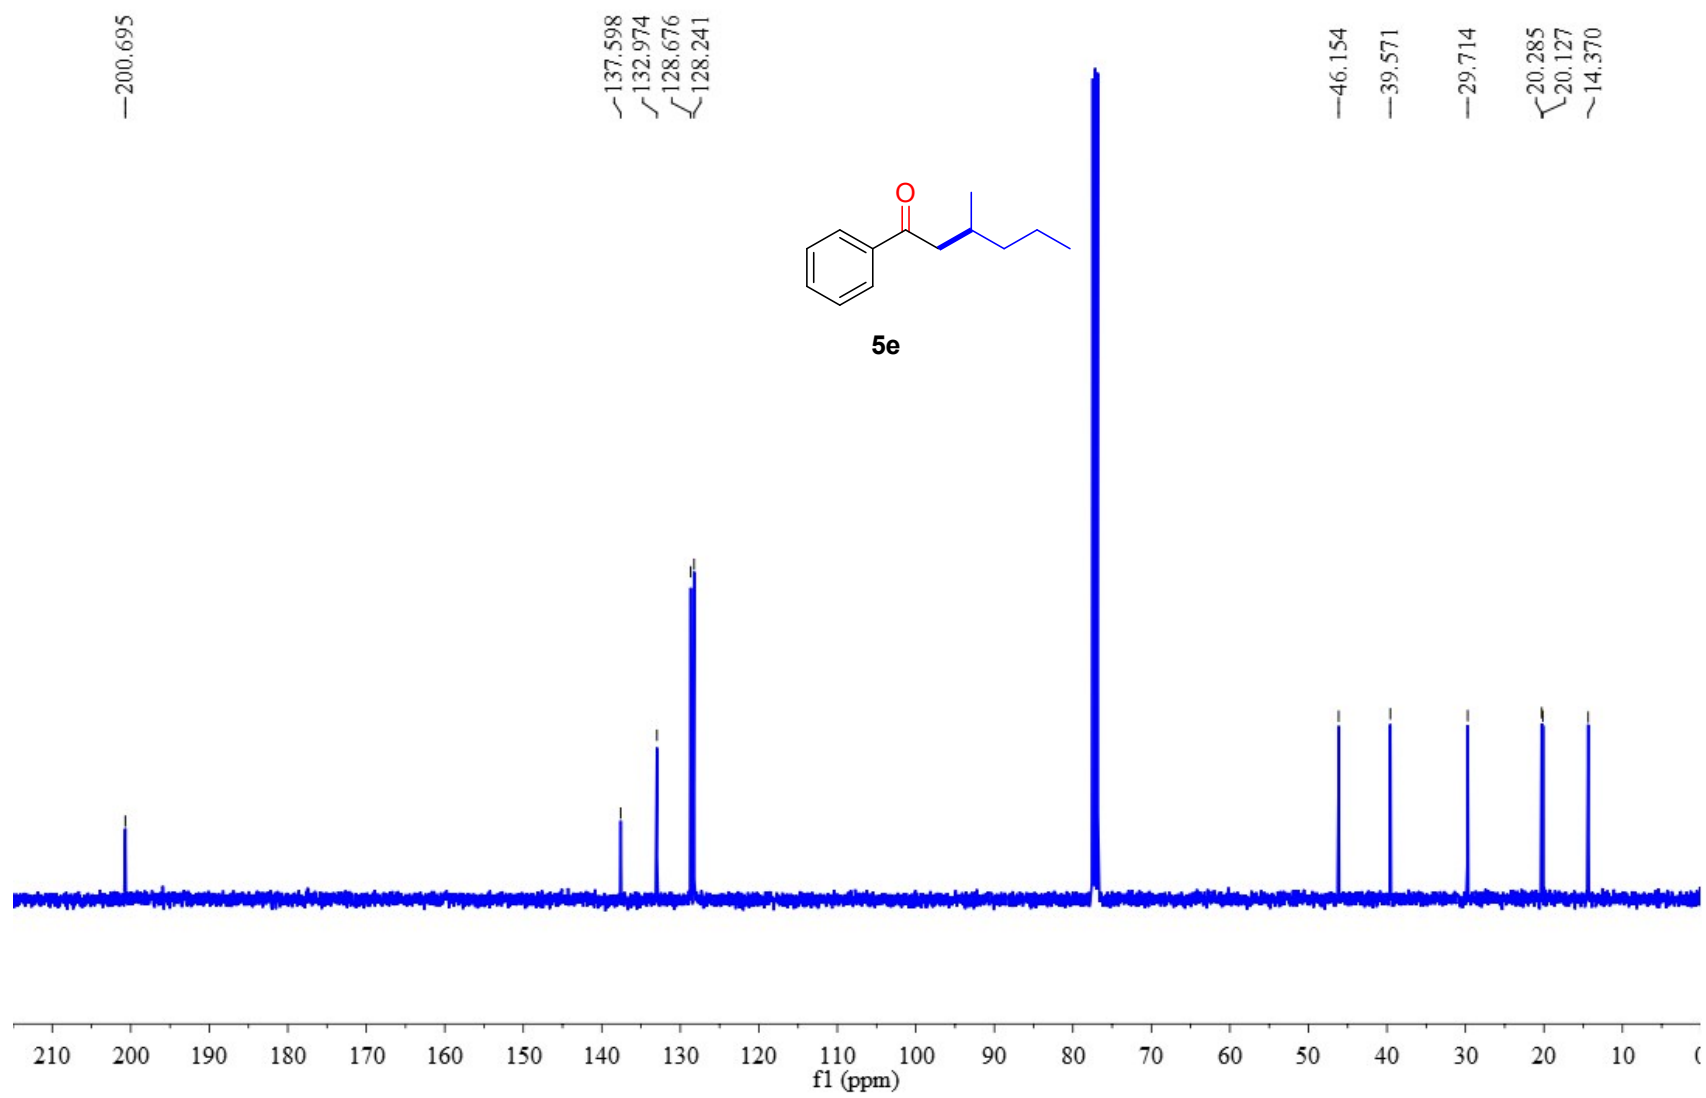

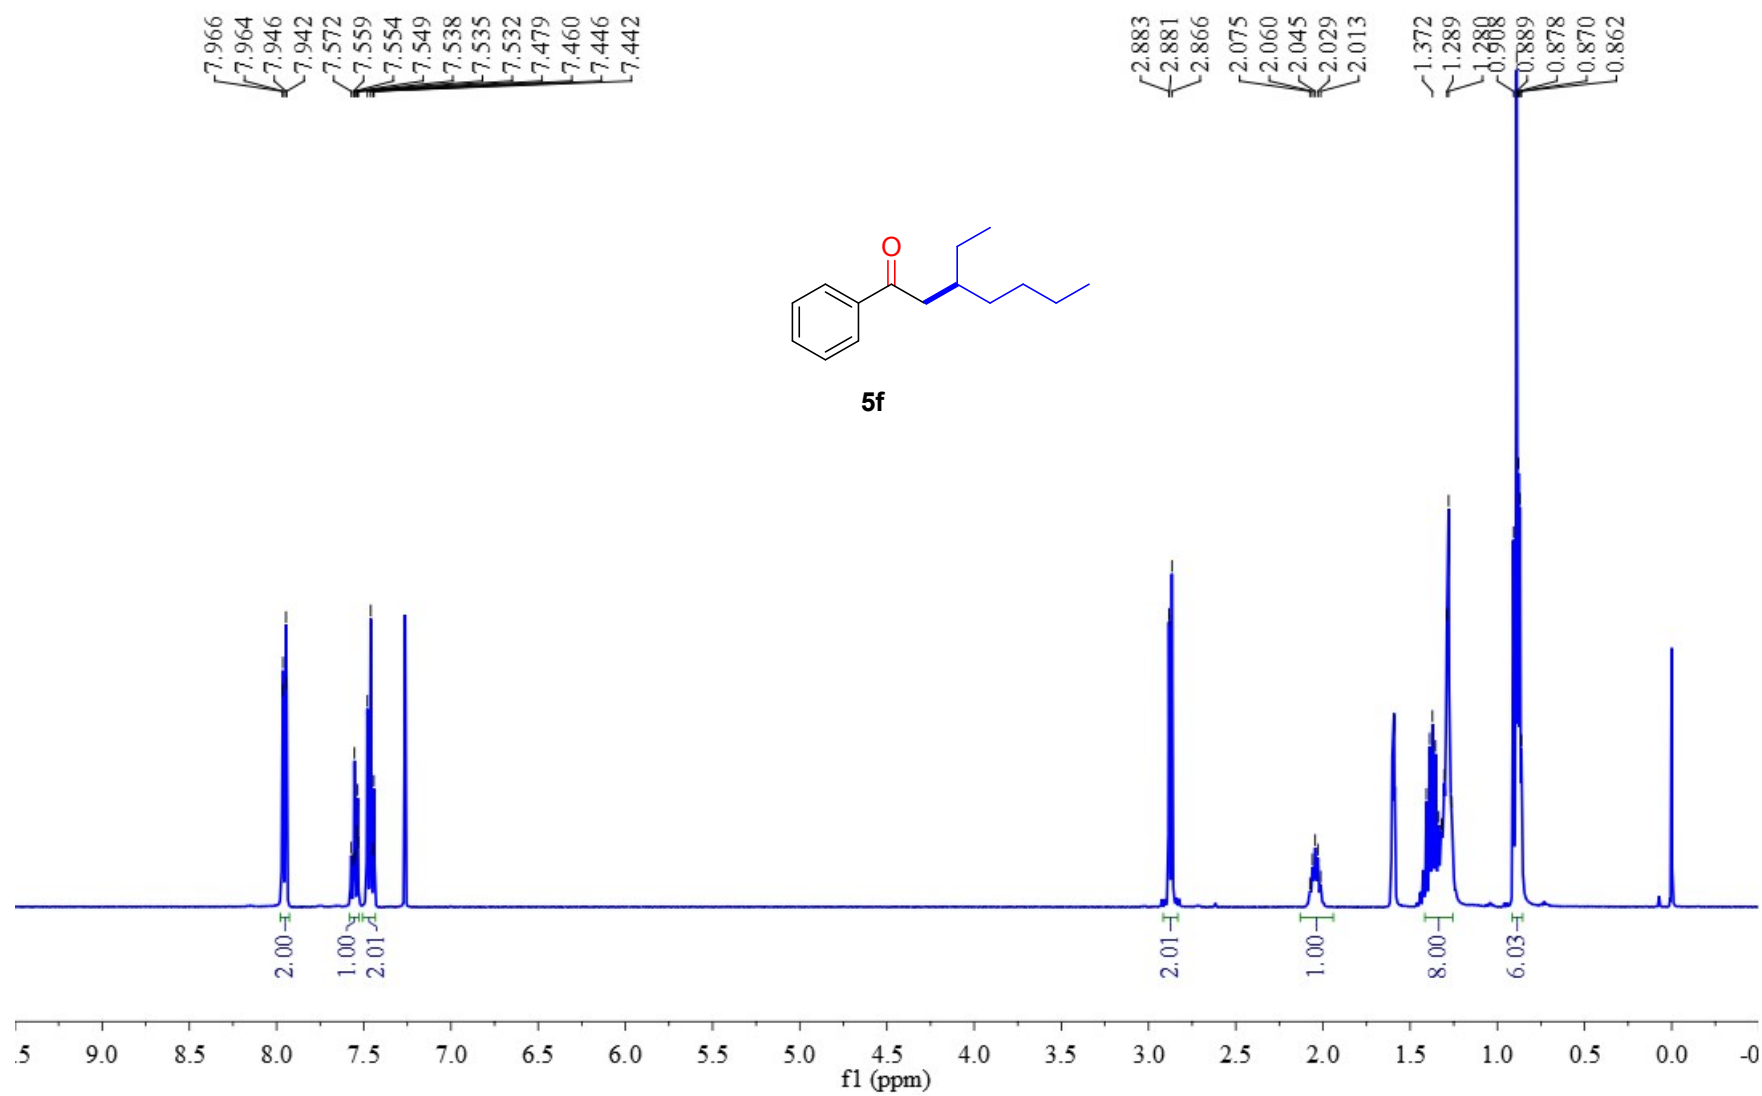

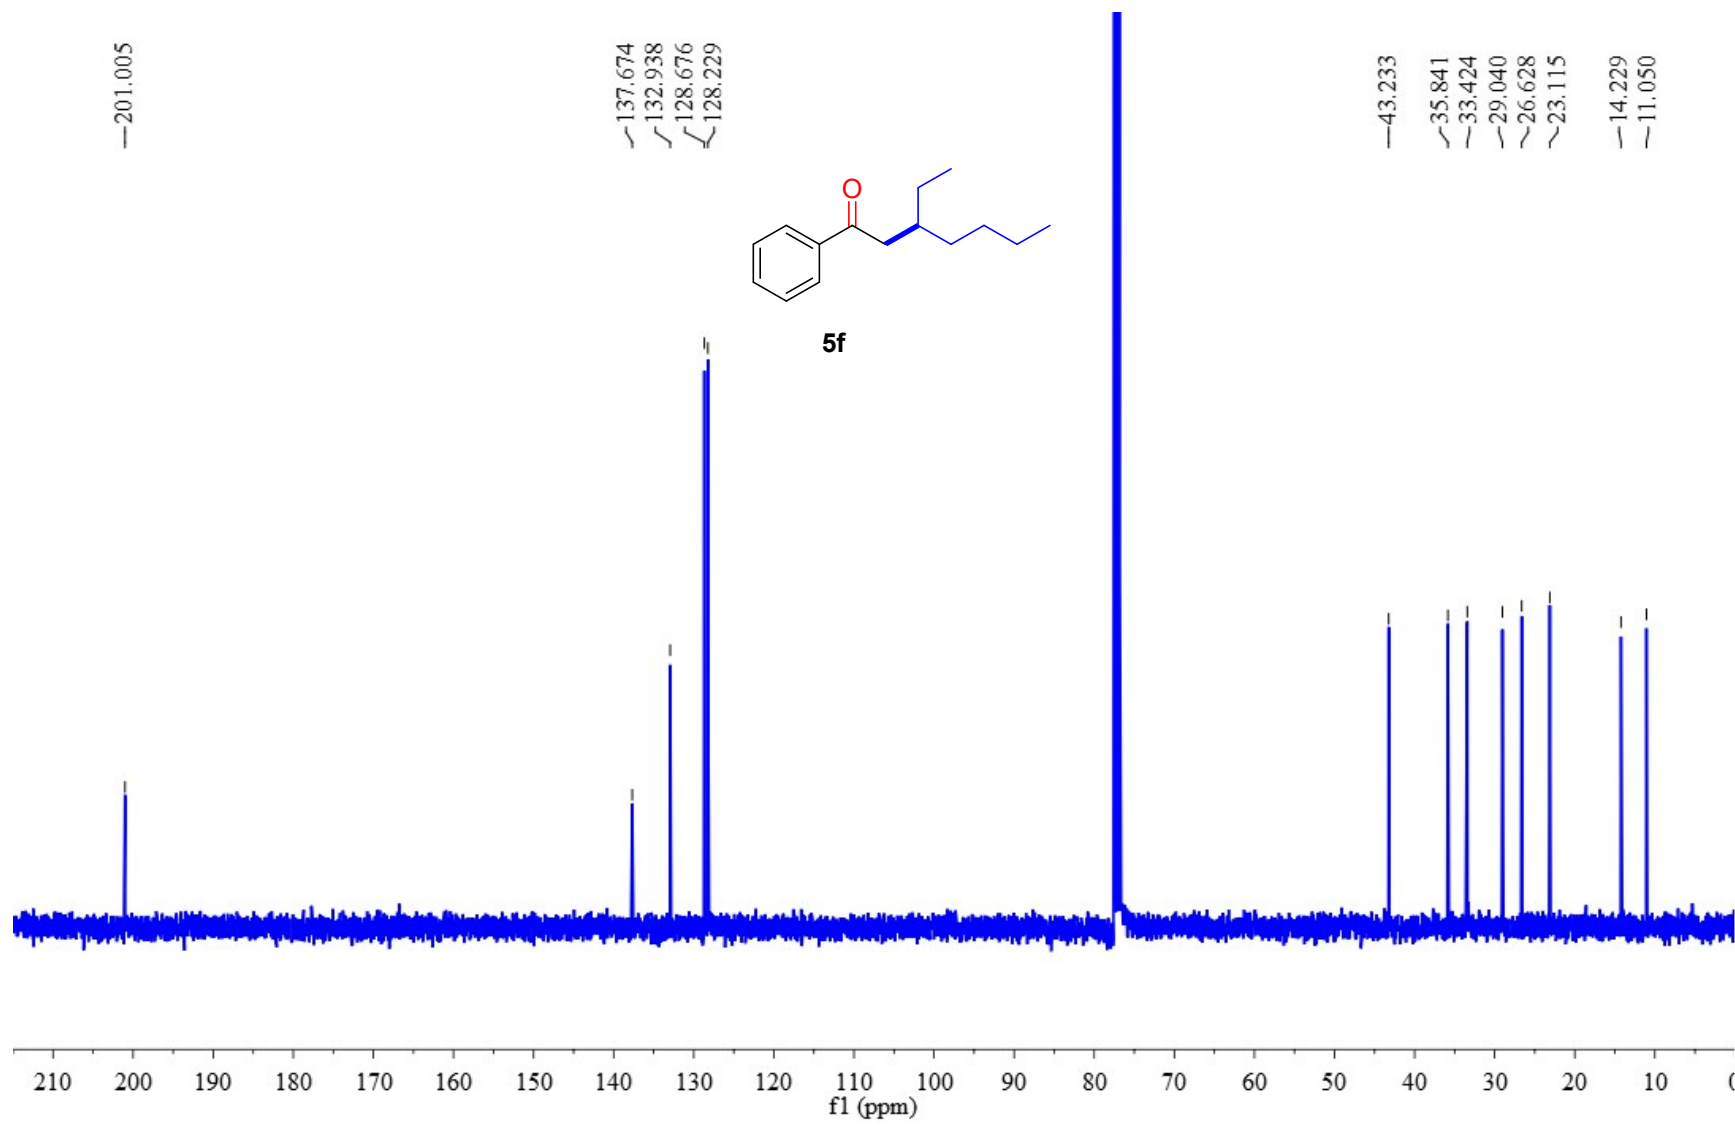

S80

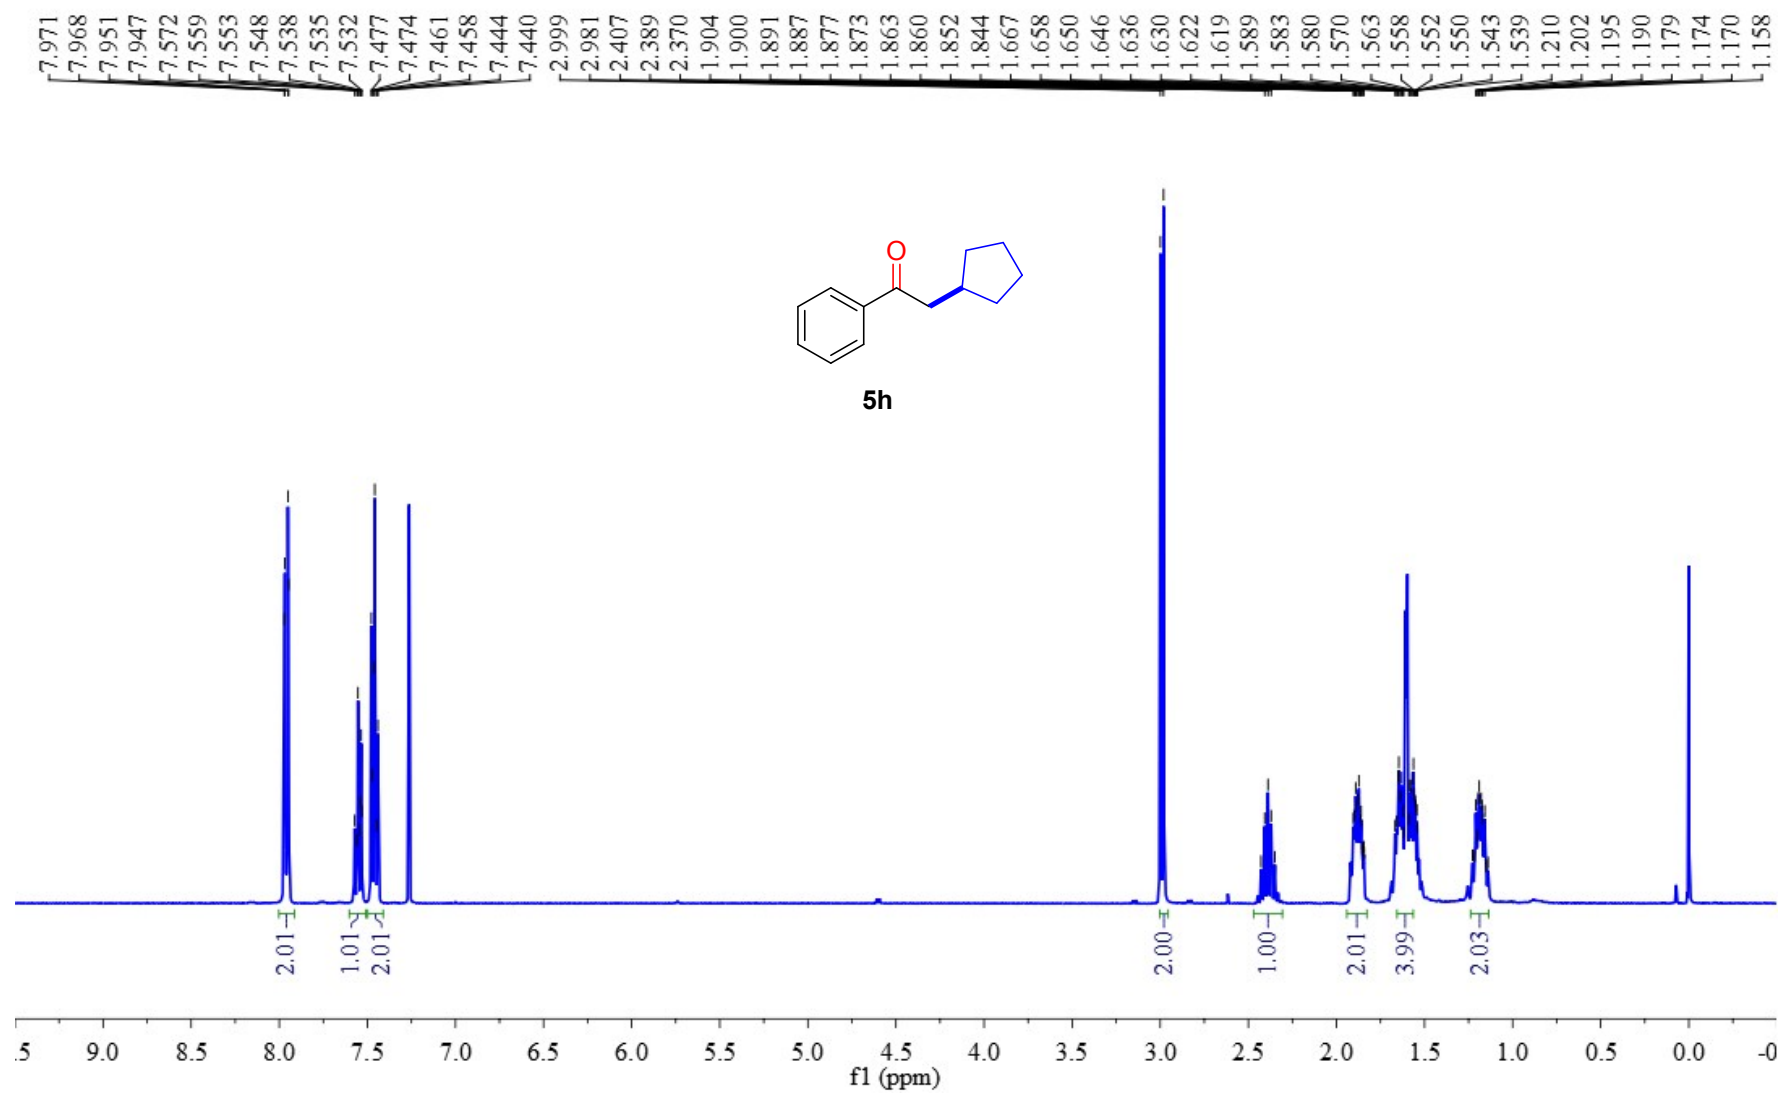

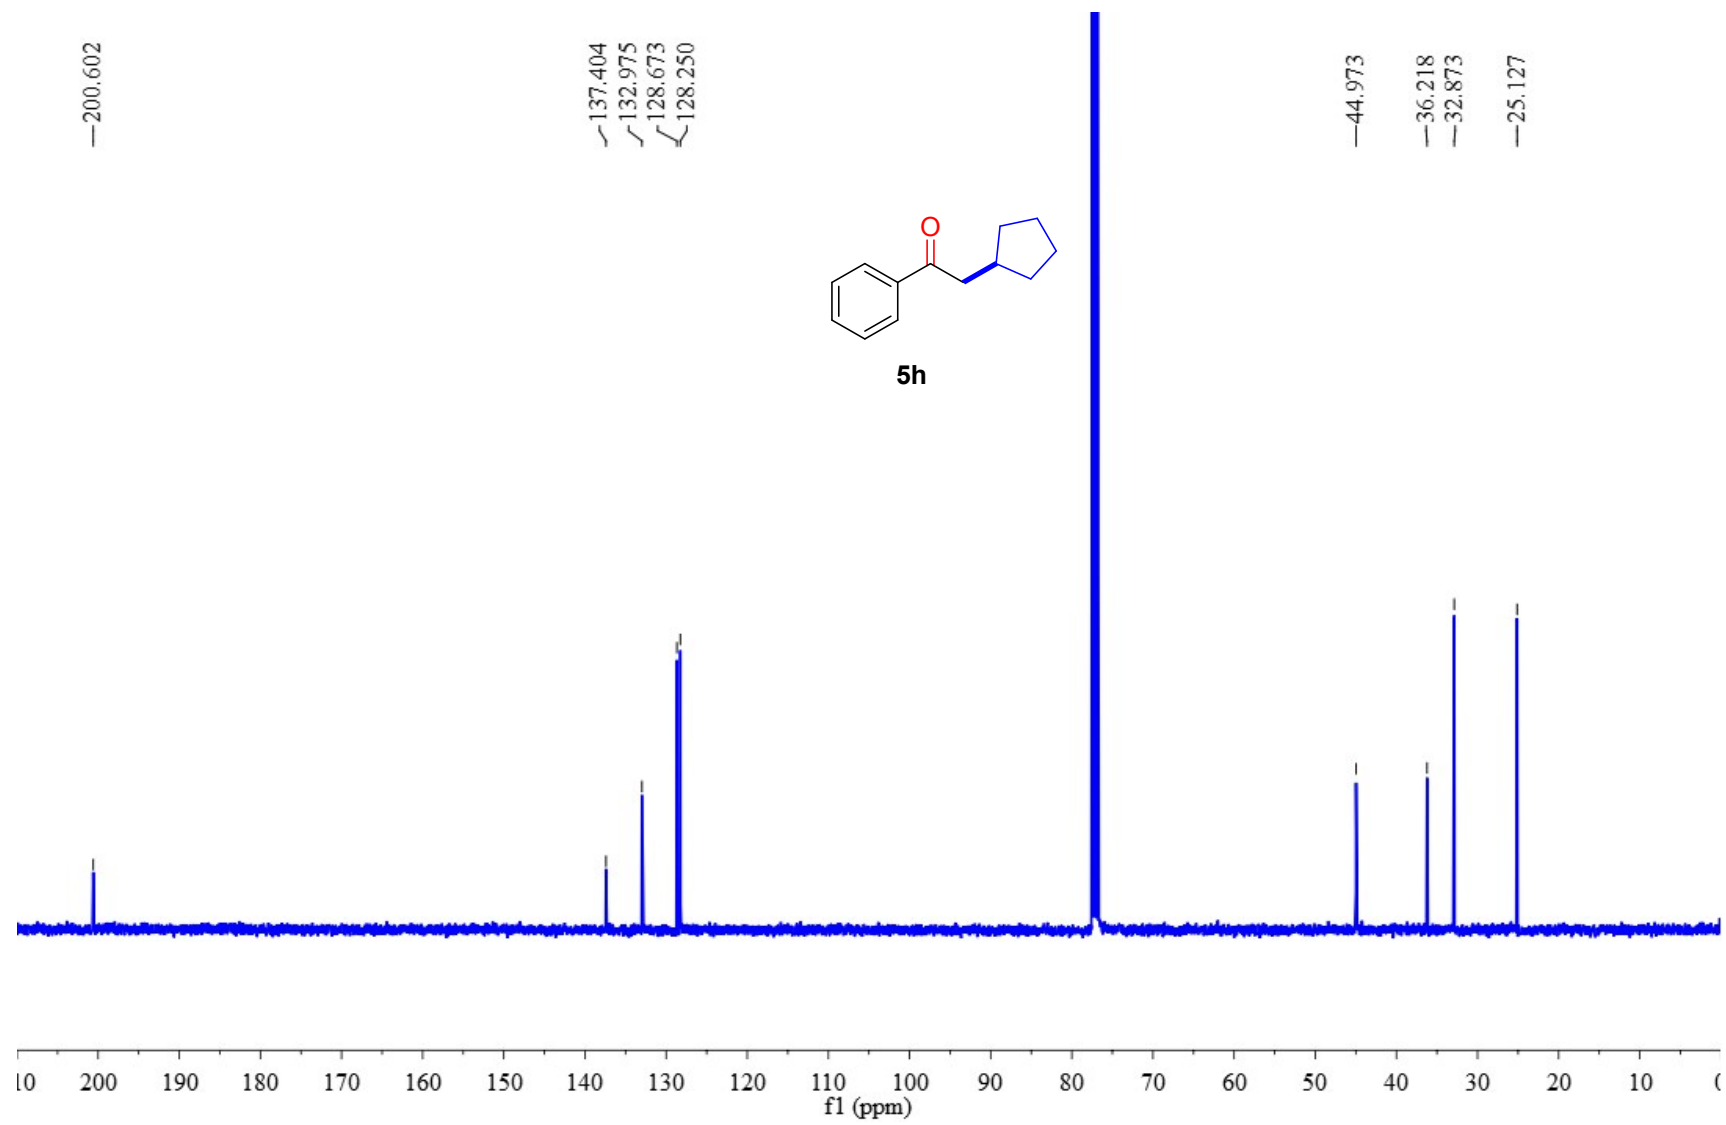

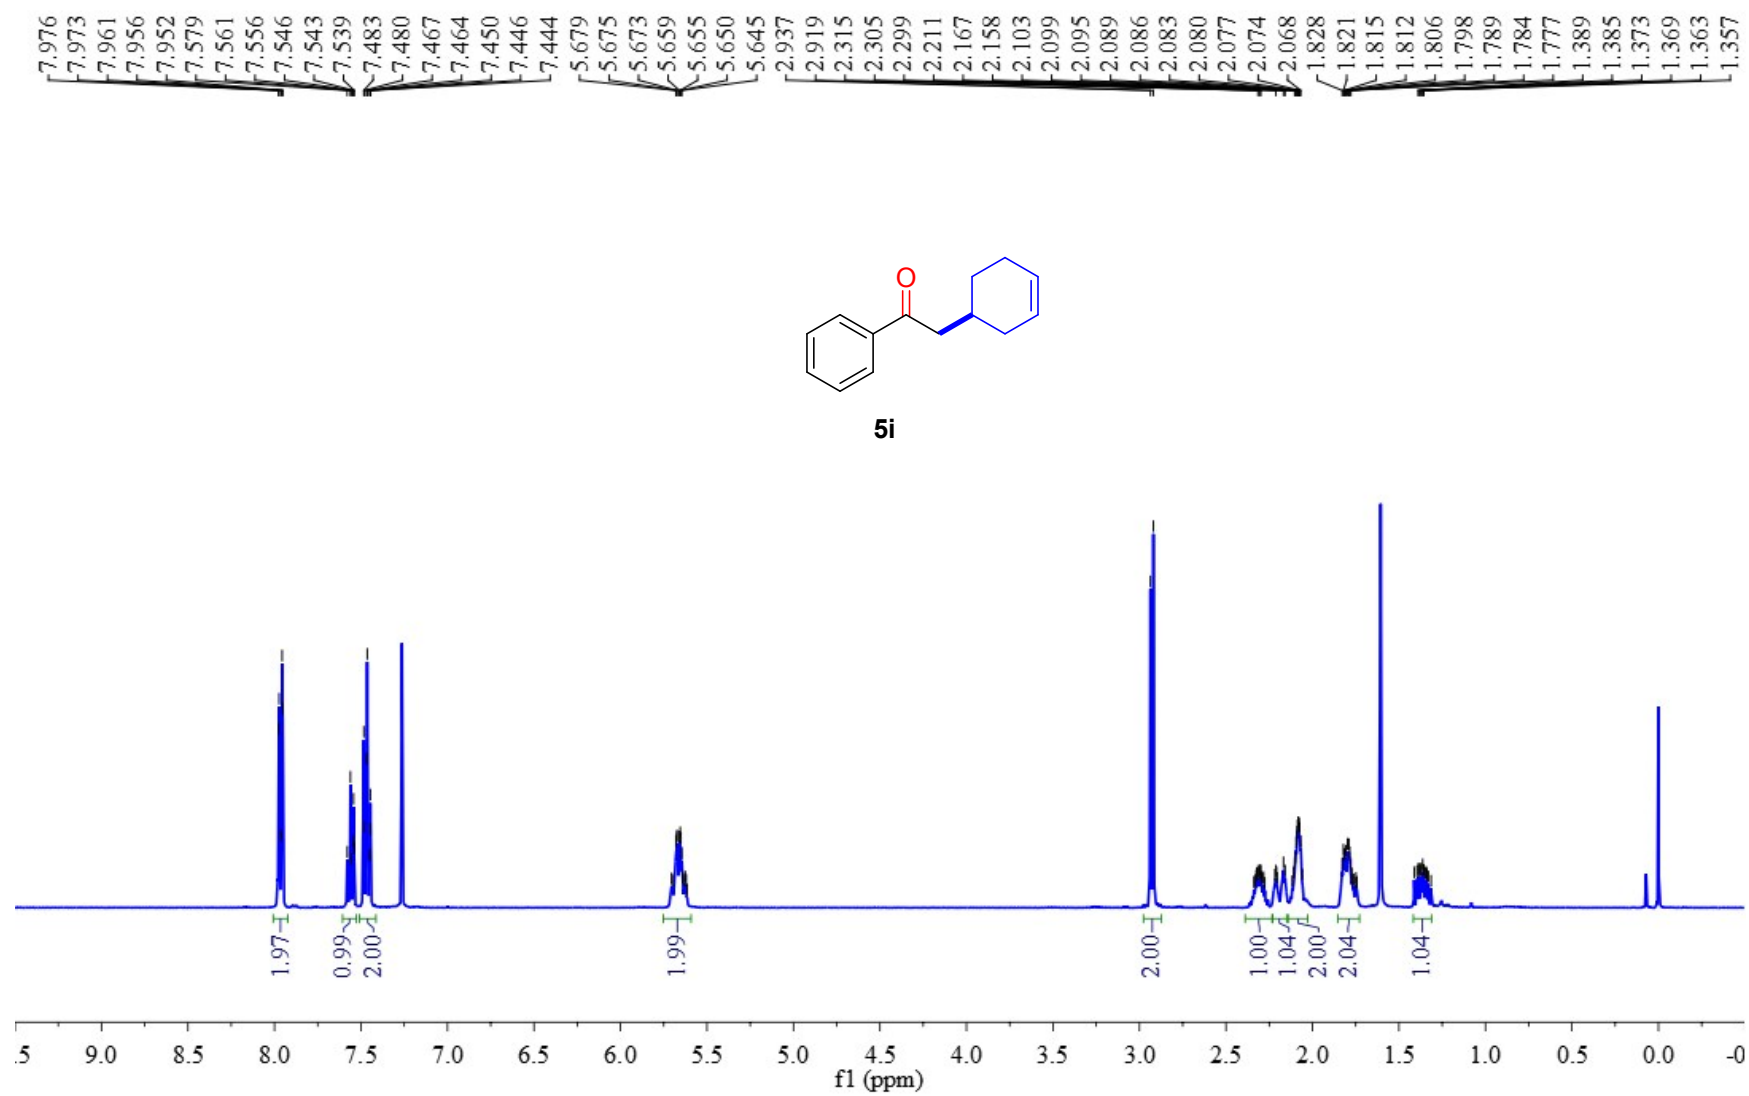

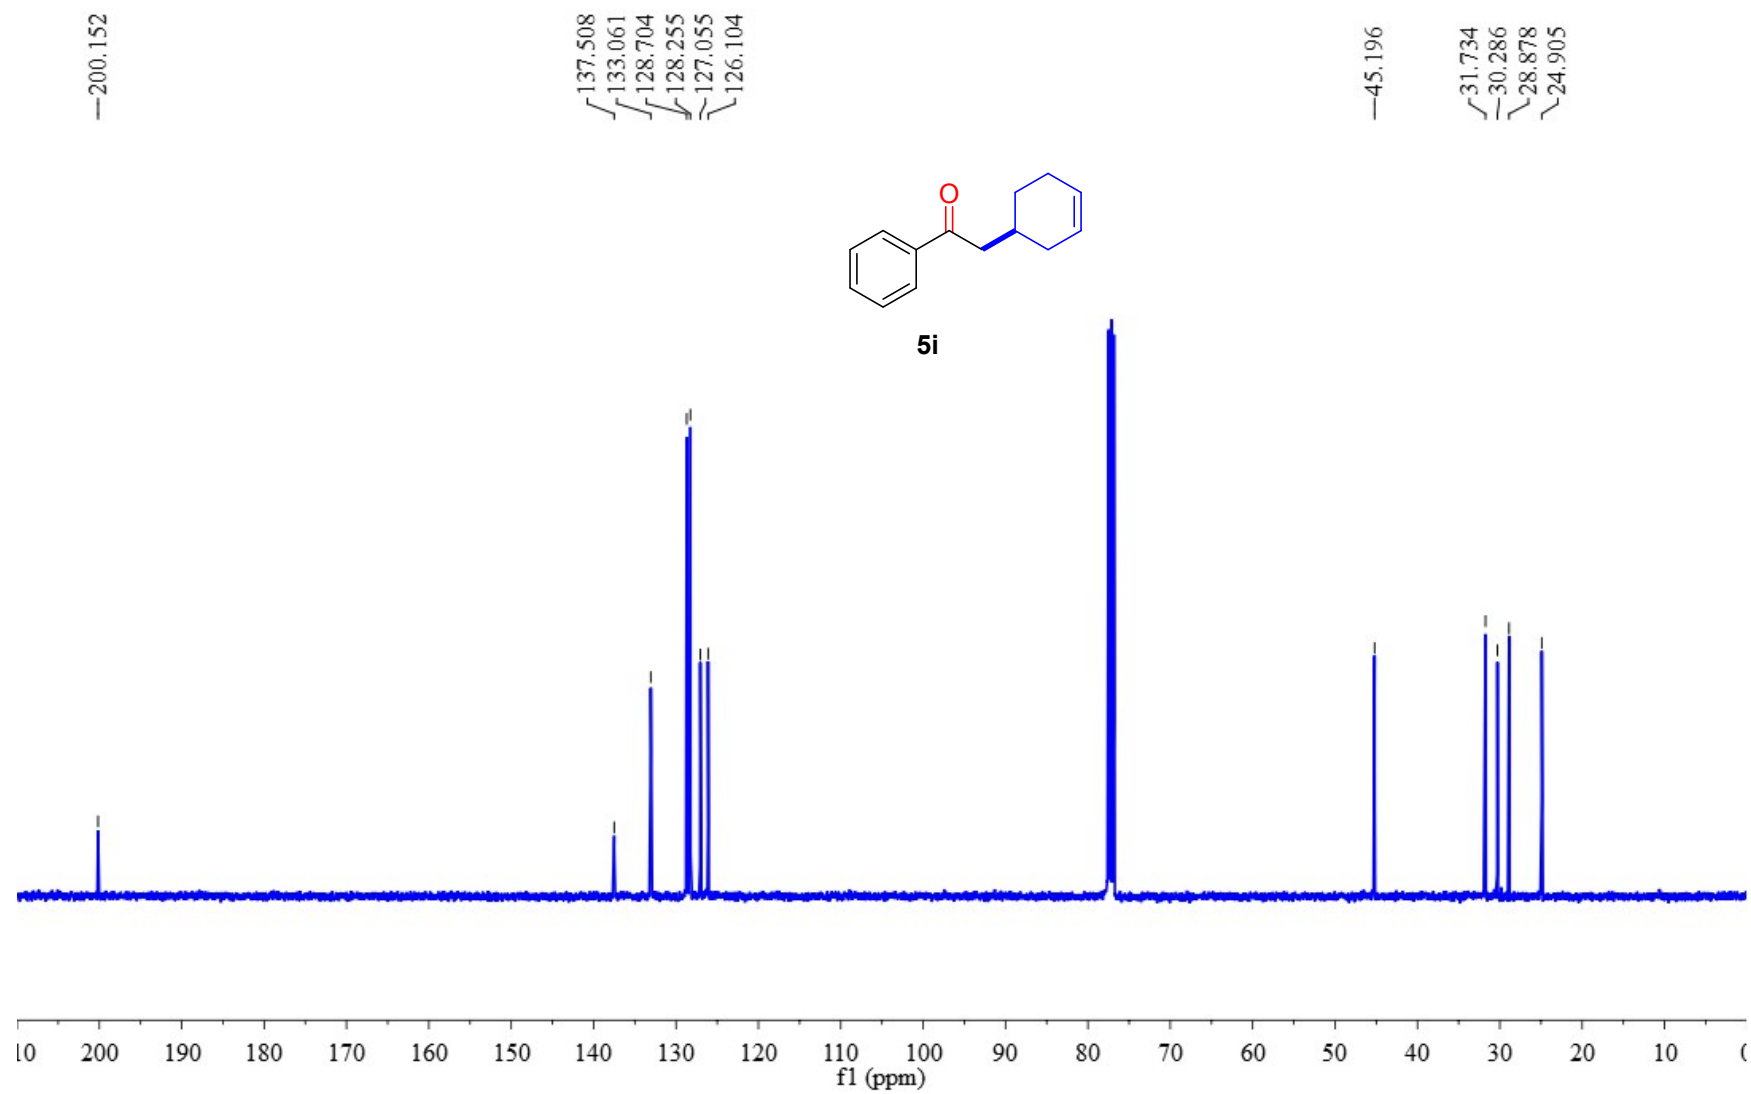



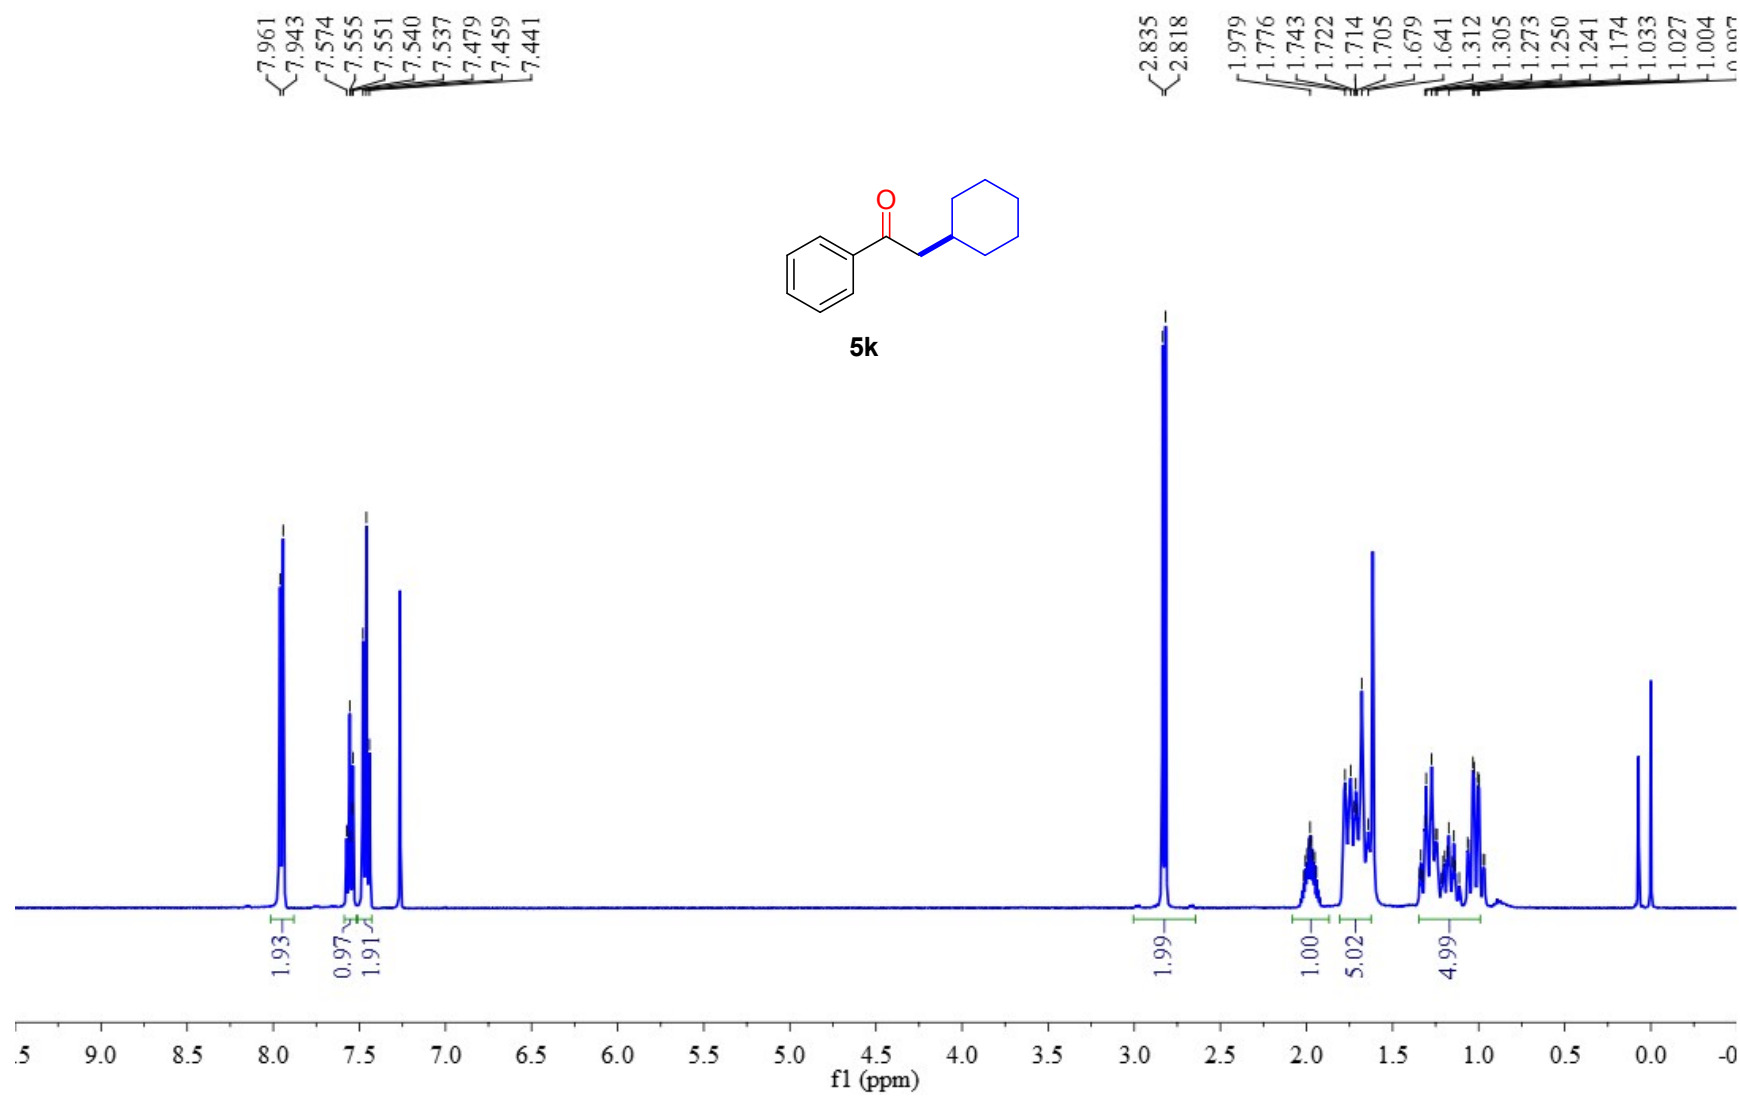

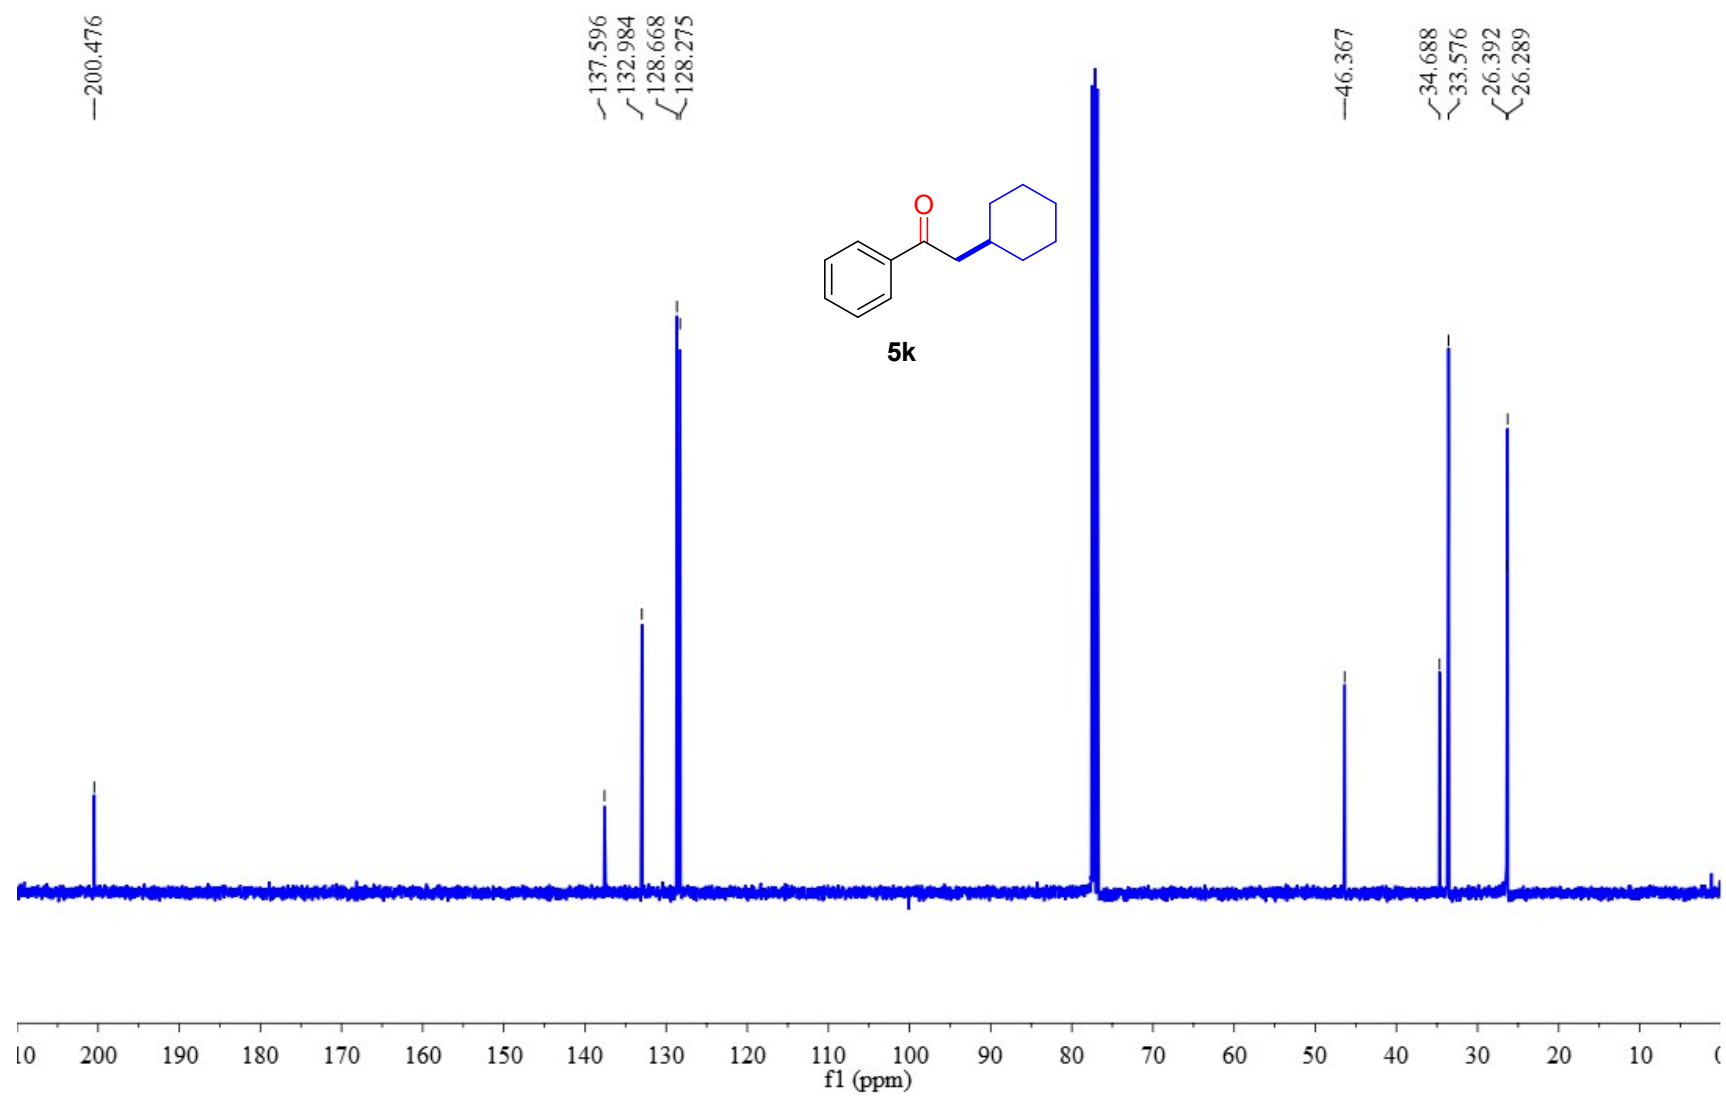

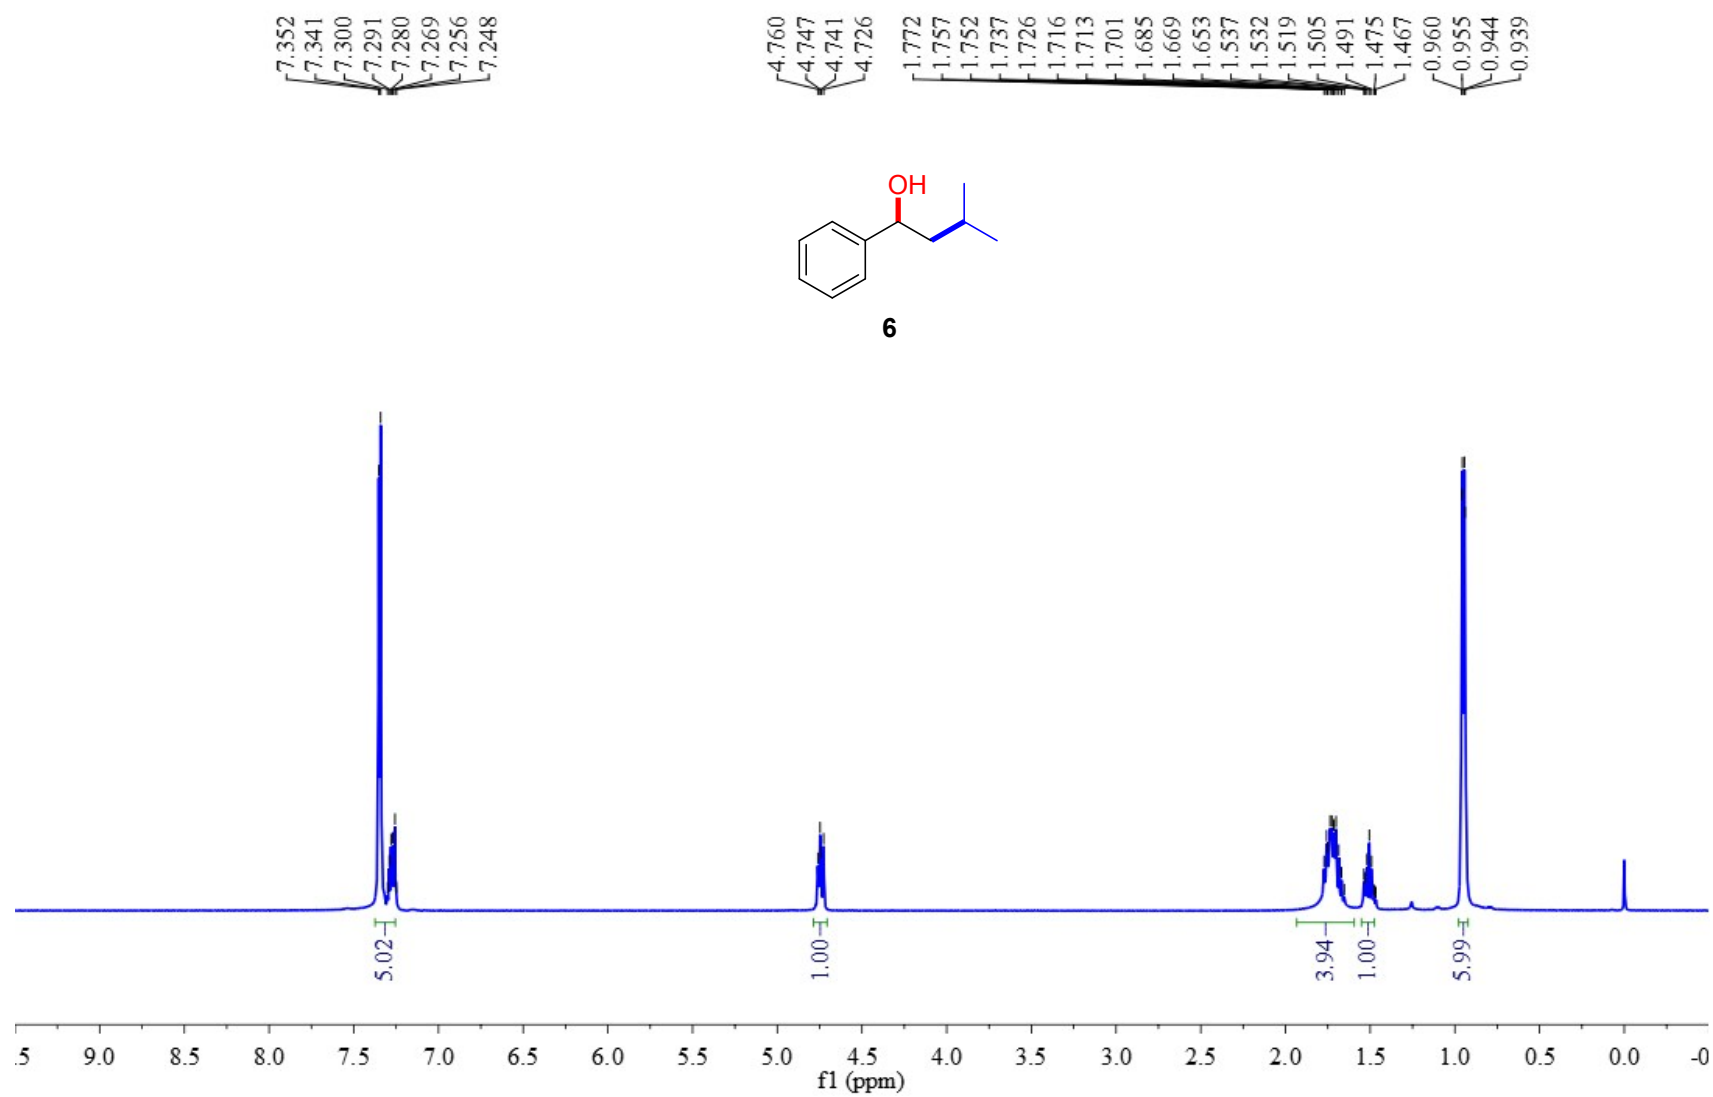

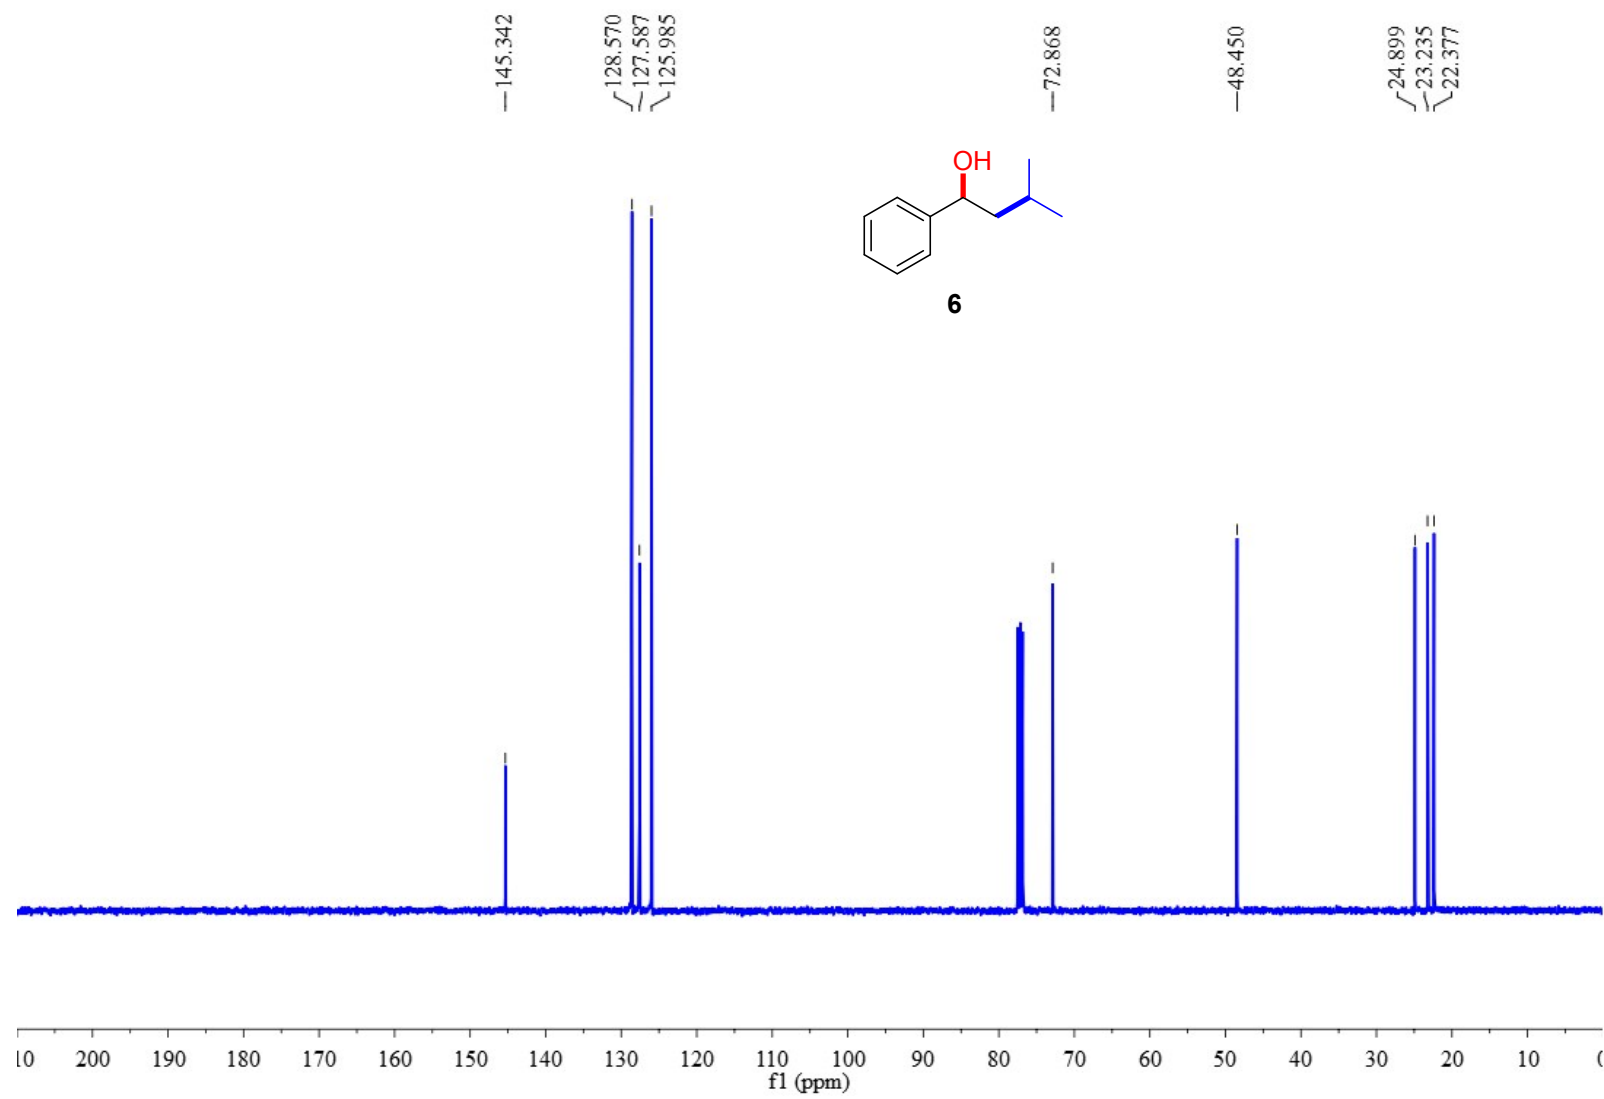

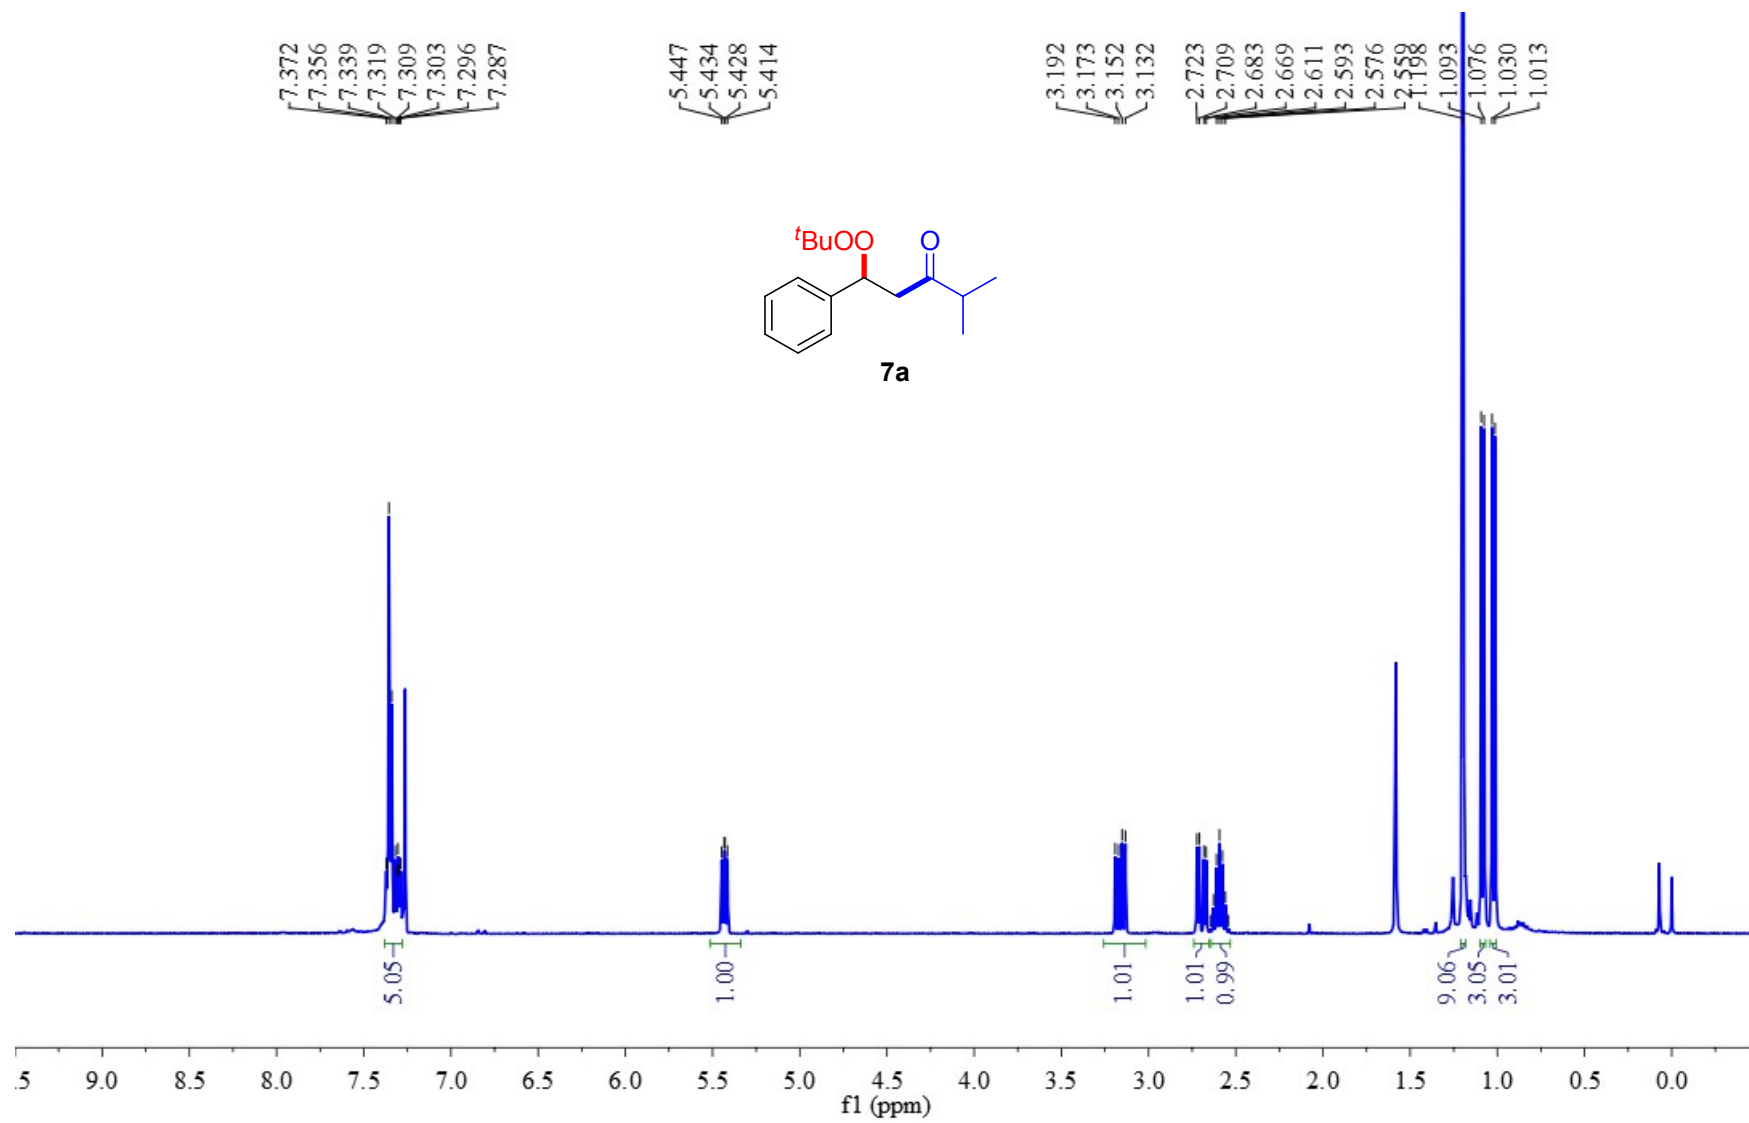

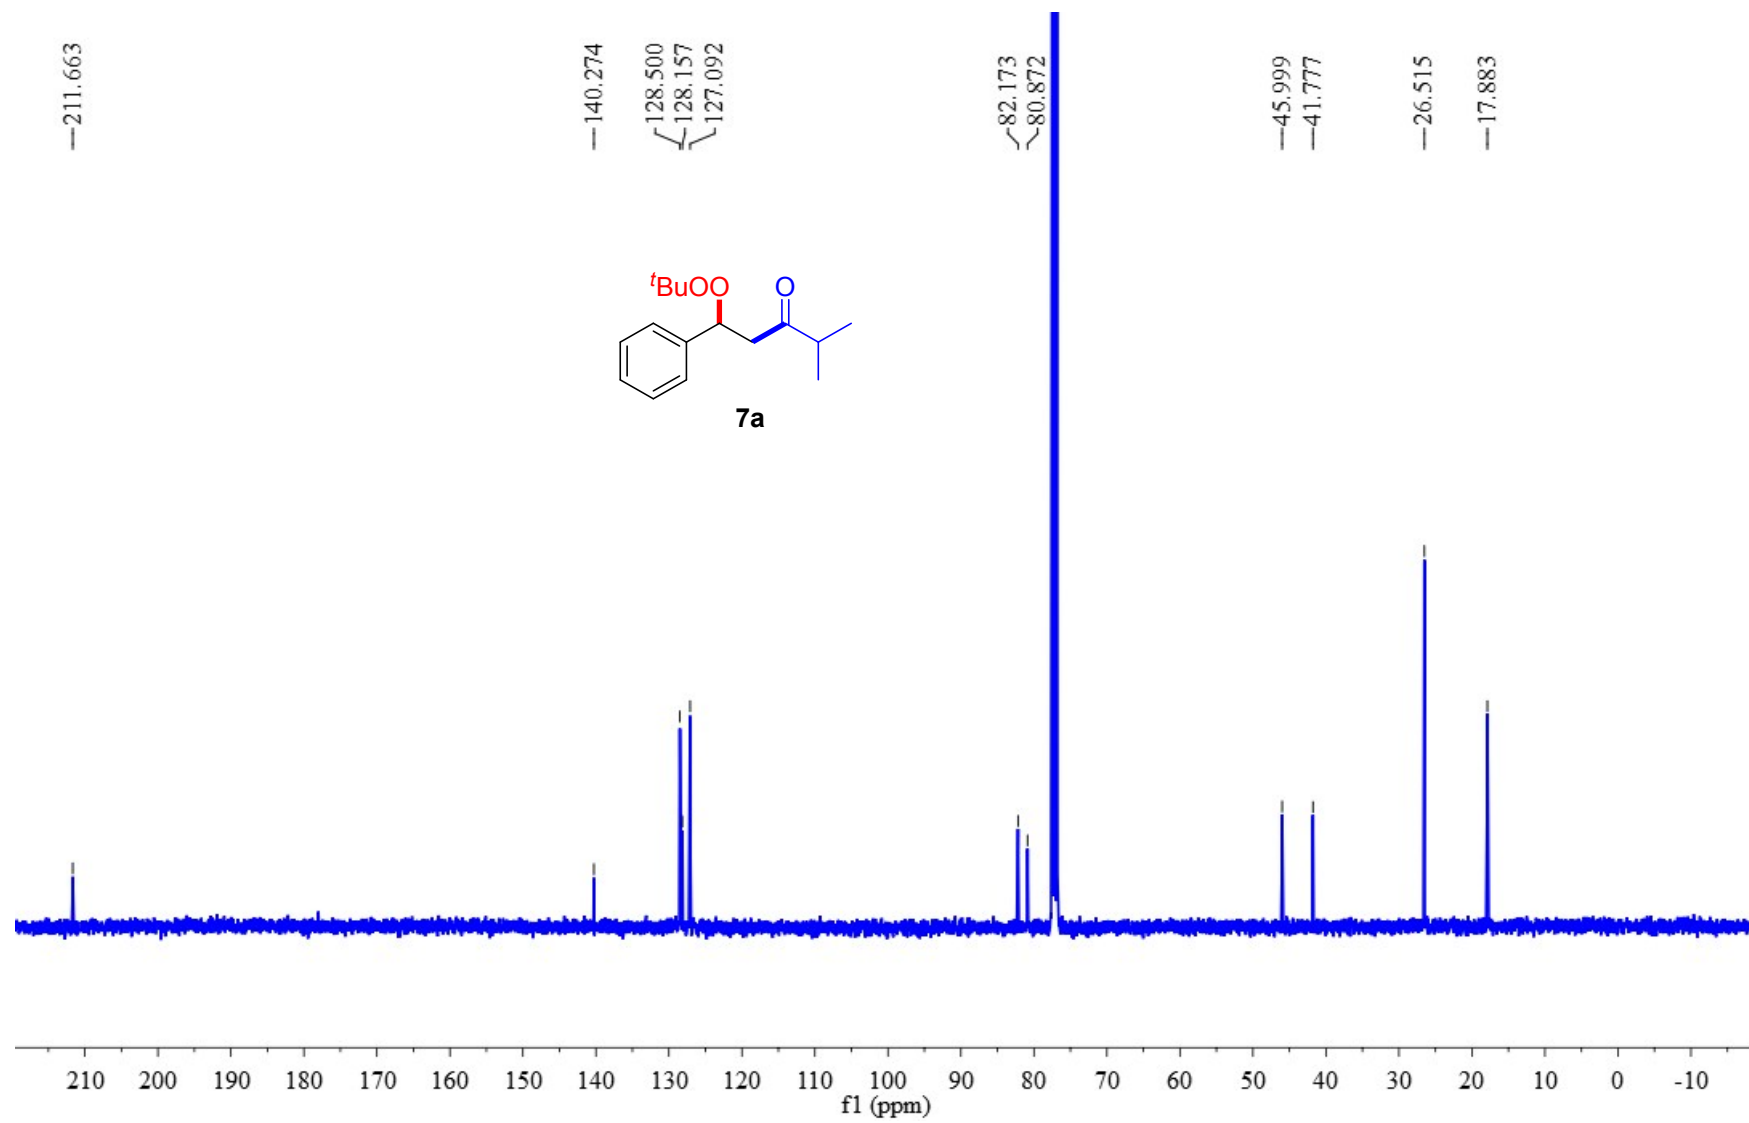

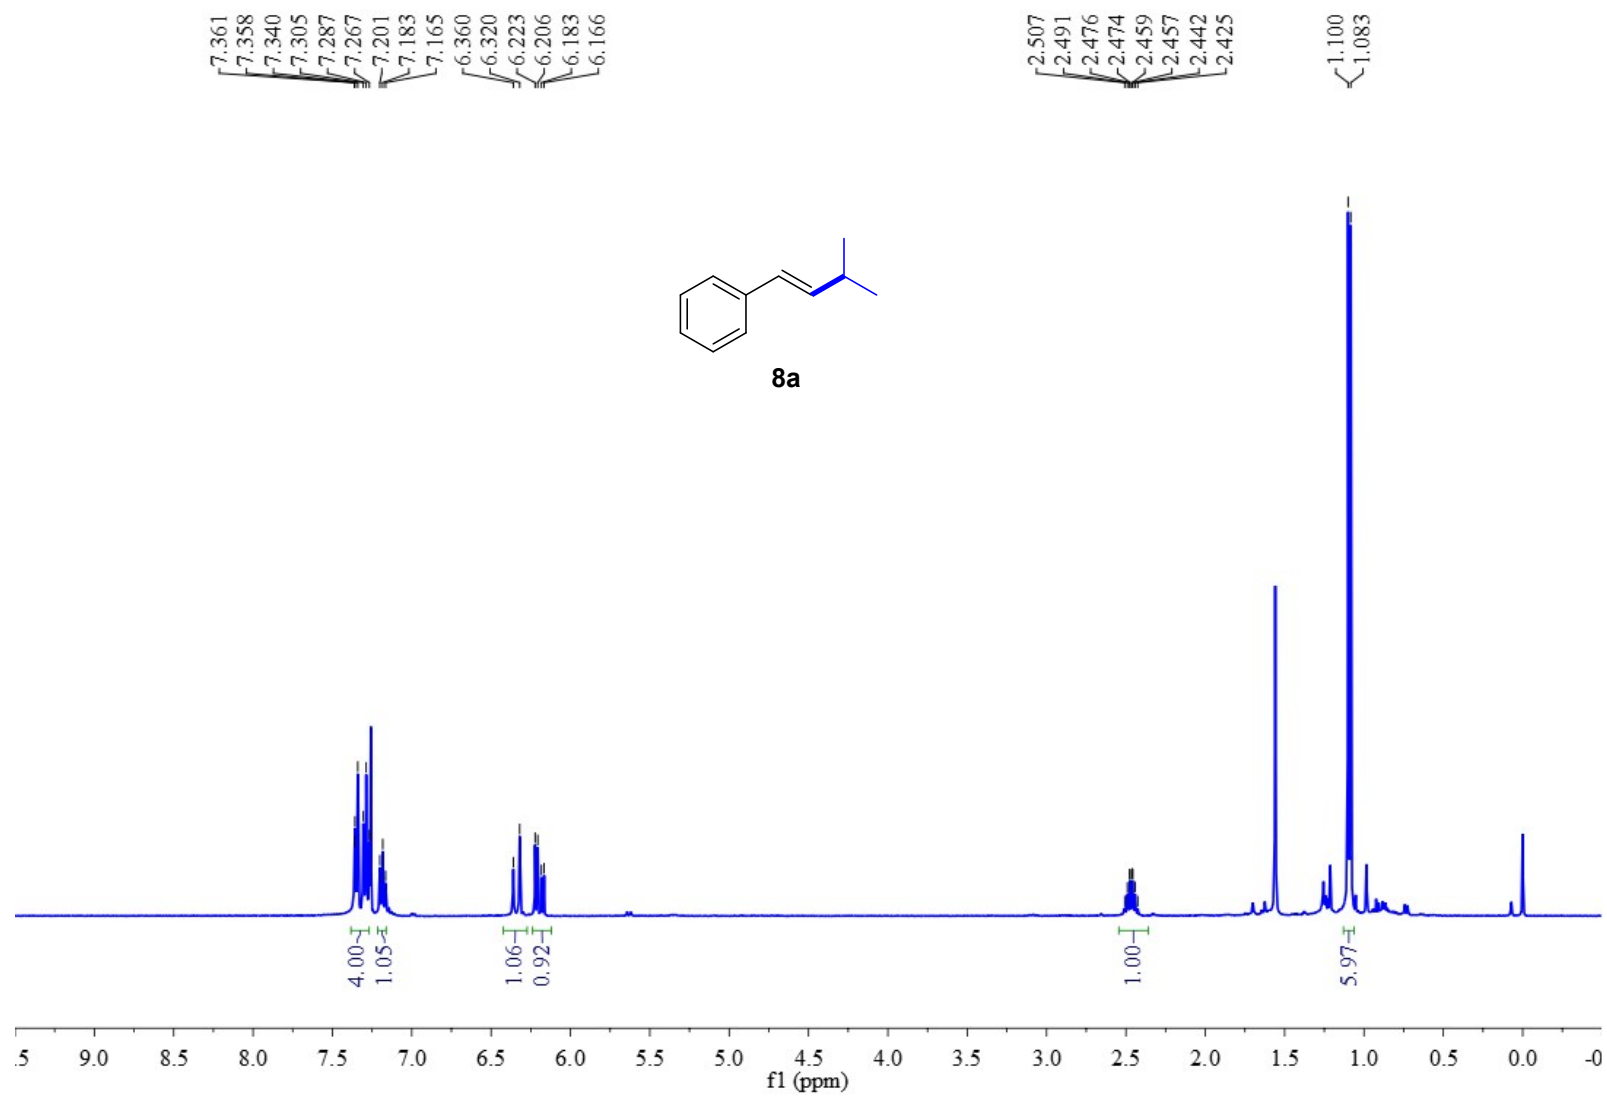

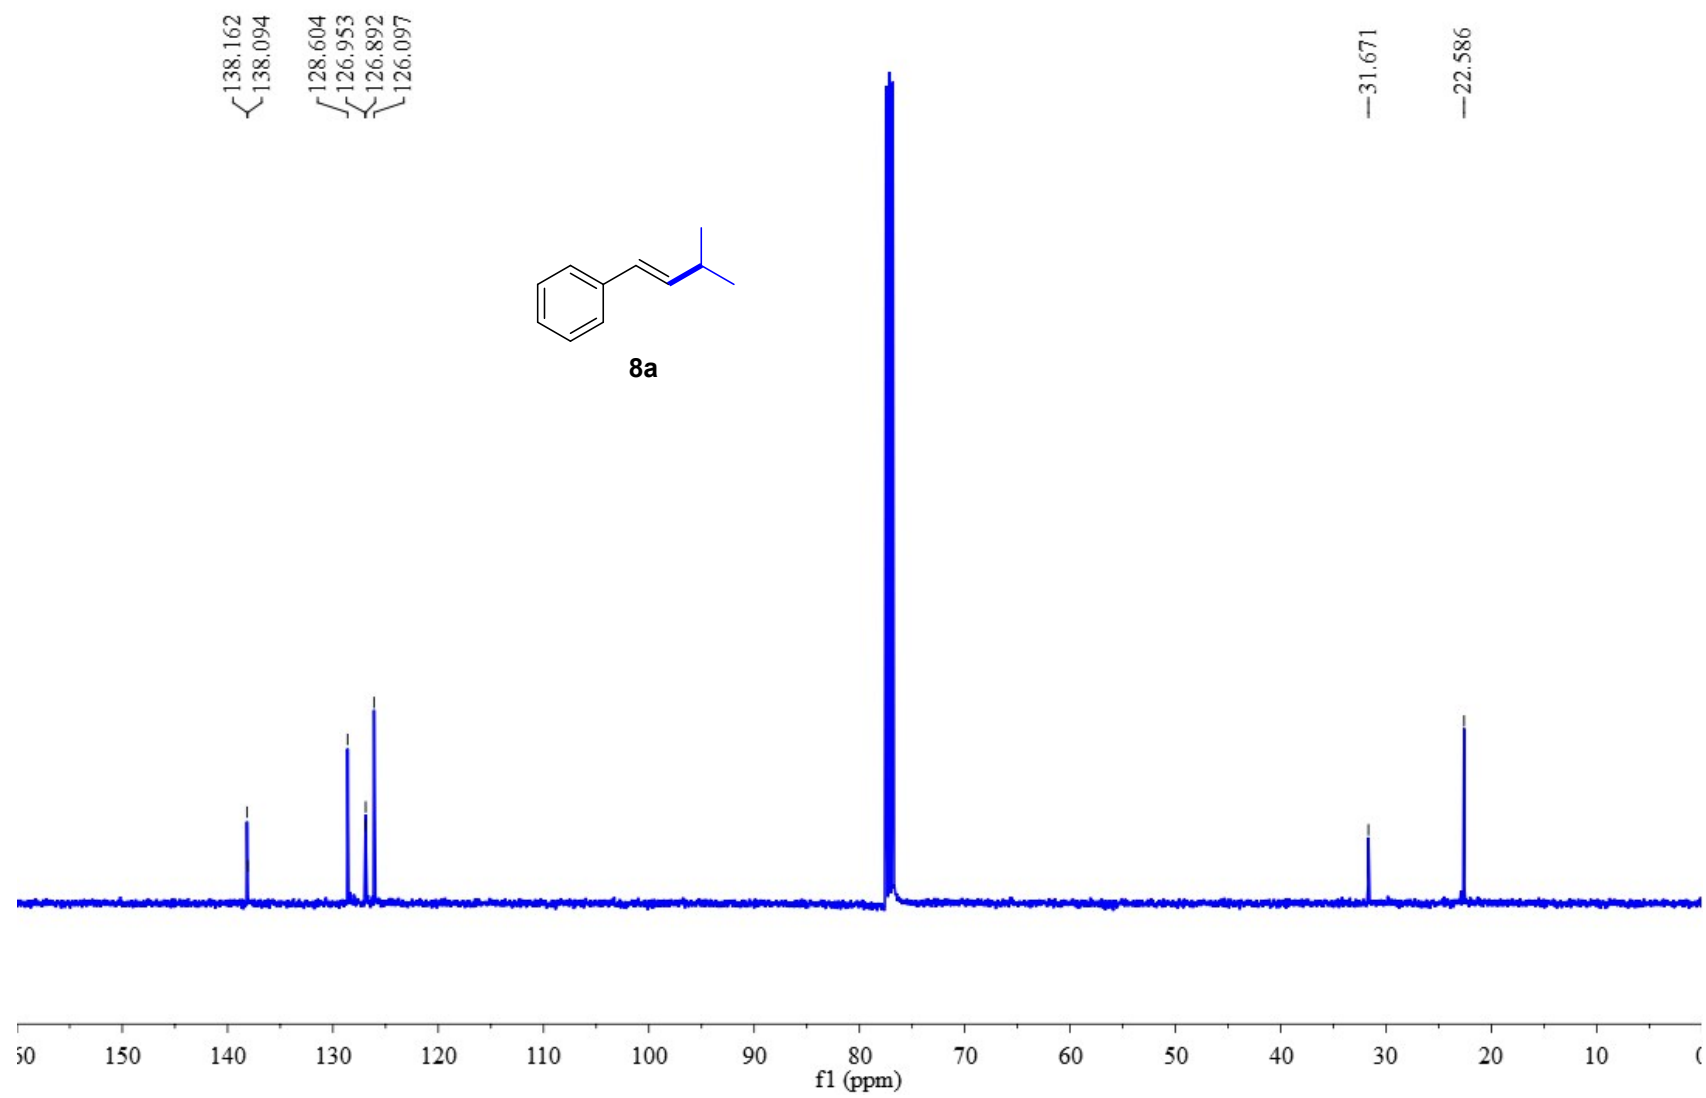

Supplement: c8gc02834f1.pdf [file c8gc02834f1.pdf]
